# Supplementary material for: The Interaction of RecA With Both CheA and CheW Is Required for Chemotaxis
Source: Front Microbiol. 2020 Apr 7;11:583. doi: 10.3389/fmicb.2020.00583 (PMC7154110; doi:10.3389/fmicb.2020.00583)
Supplement: Supplementary file 10 [file Data_Sheet_1.FASTA]

>Enterobacter_roggenkampii_strain_WCHER090065_chromosome__complete_genome
MAIDENKQKALAAALGQIEKQFGKGSIMRLGEDRTMDVETISTGSLSLDIALGAGGLPMG
RIVEIYGPESSGKTTLTLQVIAAAQREGKTCAFIDAEHALDPVYARKLGVDIDNLLCSQP
DTGEQALEICDALARSGAVDVIVVDSVAALTPKAEIEGEIGDSHMGLAARMMSQAMRKLA
GNLKQSNTLLIFINQIRMKIGVMFGNPETTTGGNALKFYASVRLDIRRIGAVKEGENVVG
SETRVKVVKNKIAAPFKQAEFQILYGEGINFYGELVDLGVKEKLIEKAGAWYSYNGDKIG
QGKANAISWLKENPAAAKEIEKKVRELLLNNQDSKPDFVVDAA---DAEETNEDF--
>Lelliottia_nimipressuralis_strain_SGAir0187_chromosome__complete_genome
MAIDENKQKALAAALGQIEKQFGKGSIMRLGEDRTMDVETISTGSLSLDIALGAGGLPMG
RIVEIYGPESSGKTTLTLQVIAAAQREGKTCAFIDAEHALDPVYARKLGVDIDNLLCSQP
DTGEQALEICDALARSGAVDVIVVDSVAALTPKAEIEGEIGDSHMGLAARMMSQAMRKLA
GNLKQSNTLLIFINQIRMKIGVMFGNPETTTGGNALKFYASVRLDIRRIGAVKEGENVVG
SETRVKVVKNKIAAPFKQAEFQILYGEGINFFGELVDLGVKEKLIEKAGAWYSYNGDKIG
QGKANAISWLKENPAAAKEIEKKVRELLLNNQDSKPDFVVDAA---DAEETNEDF--
>Pluralibacter_gergoviae_strain_FDAARGOS_186_chromosome__complete_genome
MAIDENKQKALAAALGQIEKQFGKGSIMRLGEDRTMDVETISTGSLSLDIALGAGGLPMG
RIVEIYGPESSGKTTLTLQVIAAAQREGKTCAFIDAEHALDPVYARKLGVDIDNLLCSQP
DTGEQALEICDALARSGAVDVLVVDSVAALTPKAEIEGEIGDSHMGLAARMMSQAMRKLA
GNLKQSNTLLIFINQIRMKIGVMFGNPETTTGGNALKFYASVRLDIRRIGAVKEGDNVVG
SETRVKVVKNKIAAPFKQAEFQILYGEGINFLGELVDLGVKEKLIEKAGAWYSYNGDKIG
QGKANAISWLKENPAAAKEIEKKVRELLLNNQDDKPAFAVDGN---DAEETHEEF--
>Klebsiella_pneumoniae_strain_TK421_chromosome__complete_genome
MAIDENKQKALAAALGQIEKQFGKGSIMRLGEDRTMDVETISTGSLSLDIALGAGGLPMG
RIVEIYGPESSGKTTLTLQVIAAAQREGKTCAFIDAEHALDPVYARKLGVDIDNLLCSQP
DTGEQALEICDALARSGAVDVIVVDSVAALTPKAEIEGEIGDSHMGLAARMMSQAMRKLA
GNLKQSNTLLIFINQIRMKIGVMFGNPETTTGGNALKFYASVRLDIRRIGAVKEGDNVVG
SETRVKVVKNKIAAPFKQAEFQILYGEGINFYGELVDLGVKEKLIEKAGAWYSYNGDKIG
QGKANAITWLKENPAAAKEIEKKVRELLLNNQDAKPDFVVDGN---DAEETEQDF--
>Kluyvera_georgiana_strain_YDC799_chromosome__complete_genome
MAIDENKQKALAAALGQIEKQFGKGSIMRLGEDRTMDVETISTGSLSLDIALGAGGLPMG
RIVEIYGPESSGKTTLTLQVIAAAQREGKTCAFIDAEHALDPVYARKLGVDIDNLLCSQP
DTGEQALEICDALARSGAVDVIVVDSVAALTPKAEIEGEIGDSHMGLAARMMSQAMRKLA
GNLKQSNTLLIFINQIRMKIGVMFGNPETTTGGNALKFYASVRLDIRRIGAVKEGDNVVG
SETRVKVVKNKIAAPFKQAEFQILYGEGINFFGELVDLGVKEKLIEKAGAWYSYNGDKIG
QGKANAISWLKENPAAAKEIEKKVRELLLNNQDDKPDFVVDNN---SVEETNEDF--
>Raoultella_planticola_strain_FDAARGOS_430_chromosome__complete_genome
MAIDENKQKALAAALGQIEKQFGKGSIMRLGEDRSMDVETISTGSLSLDIALGAGGLPMG
RIVEIYGPESSGKTTLTLQVIAAAQREGKTCAFIDAEHALDPVYARKLGVDIDNLLCSQP
DTGEQALEICDALARSGAVDVIVVDSVAALTPKAEIEGEIGDSHMGLAARMMSQAMRKLA
GNLKQSNTLLIFINQIRMKIGVMFGNPETTTGGNALKFYASVRLDIRRIGAVKDGDNVIG
SETRVKVVKNKIAAPFKQAEFQILYGEGINFYGELVDLGVKEKLIEKAGAWYSYNGDKIG
QGKANAISWLKDNPAAAKEIEKKVRELLLSNQDSTPDFVVDGNG-AGAEETHEDF--
>Leclercia_adecarboxylata_strain_E61_chromosome__complete_genome
MAIDENKQKALAAALGQIEKQFGKGSIMRLGEDRSMDVETISTGSLSLDIALGAGGLPMG
RIVEIYGPESSGKTTLTLQVVAAAQREGKTCAFIDAEHALDPVYARKLGVDIDNLLCSQP
DTGEQALEICDALARSGAVDVIIVDSVAALTPKAEIEGEIGDSHMGLAARMMSQAMRKLA
GNLKQSNTLLIFINQIRMKIGVMFGNPETTTGGNALKFYASVRLDIRRIGAVKDGENVVG
SETRVKVVKNKIAAPFKQAEFQILYGEGINFYGELVDLGVKEKLIEKAGAWYSYNGDKIG
QGKANAISWLKENPEAAKEIEKKVRELLLSNQDSKPQFAVDGE---GVEETNEDF--
>Salmonella_enterica_subsp._enterica_serovar_Albany_str._ATCC_51960__complete_genome
MAIDENKQKALAAALGQIEKQFGKGSIMRLGEDRSMDVETISTGSLSLDIALGAGGLPMG
RIVEIYGPESSGKTTLTLQVIAAAQREGKTCAFIDAEHALDPVYARKLGVDIDNLLCSQP
DTGEQALEICDALARSGAVDVIVVDSVAALTPKAEIEGEIGDSHMGLAARMMSQAMRKLA
GNLKQSNTLLIFINQIRMKIGVMFGNPETTTGGNALKFYASVRLDIRRIGAVKEGDNVVG
SETRVKVVKNKIAAPFKQAEFQILYGEGINFYGELVDLGVKEKLIEKAGAWYSYNGEKIG
QGKANATTWLKENPATAKEIEKRVRELLLSNQNATPDFAVDDS--EGVAETNEDF--
>Salmonella_enterica_subsp._enterica_serovar_Anatum_str._ATCC_BAA-1592__complete_genome
MAIDENKQKALAAALGQIEKQFGKGSIMRLGEDRSMDVETISTGSLSLDIALGAGGLPMG
RIVEIYGPESSGKTTLTLQVIAAAQREGKTCAFIDAEHALDPVYARKLGVDIDNLLCSQP
DTGEQALEICDALARSGAVDVIVVDSVAALTPKAEIEGEIGDSHMGLAARMMSQAMRKLA
GNLKQSNTLLIFINQIRMKIGVMFGNPETTTGGNALKFYASVRLDIRRIGAVKEGDNVVG
SETRVKVVKNKIAAPFKQAEFQILYGEGINFYGELVDLGVKEKLIEKAGAWYSYNGEKIG
QGKANATTWLKENPATAKEIEKRVRELLLSNQNATPDFAVDDS--EGVAETNEDF--
>Salmonella_enterica_subsp._enterica_serovar_Ohio_strain_SA20120345_chromosome__complete_genome
MAIDENKQKALAAALGQIEKQFGKGSIMRLGEDRSMDVETISTGSLSLDIALGAGGLPMG
RIVEIYGPESSGKTTLTLQVIAAAQREGKTCAFIDAEHALDPVYARKLGVDIDNLLCSQP
DTGEQALEICDALARSGAVDVIVVDSVAALTPKAEIEGEIGDSHMGLAARMMSQAMRKLA
GNLKQSNTLLIFINQIRMKIGVMFGNPETTTGGNALKFYASVRLDIRRIGAVKEGDNVVG
SETRVKVVKNKIAAPFKQAEFQILYGEGINFYGELVDLGVKEKLIEKAGAWYSYNGEKIG
QGKANATTWLKENPATAKEIEKRVRELLLSNQNATPDFAVDDS--EGVAETNEDF--
>Salmonella_enterica_subsp._enterica_serovar_Indiana_strain_SJTUF13520v2_isolate_food_chromosome__complete_genome
MAIDENKQKALAAALGQIEKQFGKGSIMRLGEDRSMDVETISTGSLSLDIALGAGGLPMG
RIVEIYGPESSGKTTLTLQVIAAAQREGKTCAFIDAEHALDPVYARKLGVDIDNLLCSQP
DTGEQALEICDALARSGAVDVIVVDSVAALTPKAEIEGEIGDSHMGLAARMMSQAMRKLA
GNLKQSNTLLIFINQIRMKIGVMFGNPETTTGGNALKFYASVRLDIRRIGAVKEGDNVVG
SETRVKVVKNKIAAPFKQAEFQILYGEGINFYGELVDLGVKEKLIEKAGAWYSYNGEKIG
QGKANATTWLKENPATAKEIEKRVRELLLSNQNATPDFAVDDS--EGVAETNEDF--
>Salmonella_enterica_subsp._enterica_serovar_Bareilly_str._CFSAN000211_chromosome__complete_genome
MAIDENKQKALAAALGQIEKQFGKGSIMRLGEDRSMDVETISTGSLSLDIALGAGGLPMG
RIVEIYGPESSGKTTLTLQVIAAAQREGKTCAFIDAEHALDPVYARKLGVDIDNLLCSQP
DTGEQALEICDALARSGAVDVIVVDSVAALTPKAEIEGEIGDSHMGLAARMMSQAMRKLA
GNLKQSNTLLIFINQIRMKIGVMFGNPETTTGGNALKFYASVRLDIRRIGAVKEGDNVVG
SETRVKVVKNKIAAPFKQAEFQILYGEGINFYGELVDLGVKEKLIEKAGAWYSYNGEKIG
QGKANATTWLKENPATAKEIEKRVRELLLSNQNATPDFAVDDS--EGVAETNEDF--
>Salmonella_enterica_subsp._enterica_serovar_Enteritidis_str._EC20120008__complete_genome
MAIDENKQKALAAALGQIEKQFGKGSIMRLGEDRSMDVETISTGSLSLDIALGAGGLPMG
RIVEIYGPESSGKTTLTLQVIAAAQREGKTCAFIDAEHALDPVYARKLGVDIDNLLCSQP
DTGEQALEICDALARSGAVDVIVVDSVAALTPKAEIEGEIGDSHMGLAARMMSQAMRKLA
GNLKQSNTLLIFINQIRMKIGVMFGNPETTTGGNALKFYASVRLDIRRIGAVKEGDNVVG
SETRVKVVKNKIAAPFKQAEFQILYGEGINFYGELVDLGVKEKLIEKAGAWYSYNGEKIG
QGKANATTWLKENPATAKEIEKRVRELLLSNQNATPDFAVDDS--EGVAETNEDF--
>Salmonella_enterica_subsp._enterica_serovar_Schwarzengrund_str._CVM19633__complete_genome
MAIDENKQKALAAALGQIEKQFGKGSIMRLGEDRSMDVETISTGSLSLDIALGAGGLPMG
RIVEIYGPESSGKTTLTLQVIAAAQREGKTCAFIDAEHALDPVYARKLGVDIDNLLCSQP
DTGEQALEICDALARSGAVDVIVVDSVAALTPKAEIEGEIGDSHMGLAARMMSQAMRKLA
GNLKQSNTLLIFINQIRMKIGVMFGNPETTTGGNALKFYASVRLDIRRIGAVKEGDNVVG
SETRVKVVKNKIAAPFKQAEFQILYGEGINFYGELVDLGVKEKLIEKAGAWYSYNGEKIG
QGKANATTWLKENPATAKEIEKRVRELLLSNQNATPDFAVDDS--EGVAETNEDF--
>Salmonella_enterica_subsp._enterica_serovar_Typhi_strain_311189_268186_chromosome__complete_genome
MAIDENKQKALAAALGQIEKQFGKGSIMRLGEDRSMDVETISTGSLSLDIALGAGGLPMG
RIVEIYGPESSGKTTLTLQVIAAAQREGKTCAFIDAEHALDPVYARKLGVDIDNLLCSQP
DTGEQALEICDALARSGAVDVIVVDSVAALTPKAEIEGEIGDSHMGLAARMMSQAMRKLA
GNLKQSNTLLIFINQIRMKIGVMFGNPETTTGGNALKFYASVRLDIRRIGAVKEGDNVVG
SETRVKVVKNKIAAPFKQAEFQILYGEGINFYGELVDLGVKEKLIEKAGAWYSYNGEKIG
QGKANATTWLKENPATAKEIEKRVRELLLSNQNATPDFAVDDS--EGVAETNEDF--
>Salmonella_enterica_subsp._enterica_serovar_Heidelberg_strain_A3EZ223_chromosome__complete_genome
MAIDENKQKALAAALGQIEKQFGKGSIMRLGEDRSMDVETISTGSLSLDIALGAGGLPMG
RIVEIYGPESSGKTTLTLQVIAAAQREGKTCAFIDAEHALDPVYARKLGVDIDNLLCSQP
DTGEQALEICDALARSGAVDVIVVDSVAALTPKAEIEGEIGDSHMGLAARMMSQAMRKLA
GNLKQSNTLLIFINQIRMKIGVMFGNPETTTGGNALKFYASVRLDIRRIGAVKEGDNVVG
SETRVKVVKNKIAAPFKQAEFQILYGEGINFYGELVDLGVKEKLIEKAGAWYSYNGEKIG
QGKANATTWLKENPATAKEIEKRVRELLLSNQNATPDFAVDDS--EGVAETNEDF--
>Salmonella_enterica_subsp._enterica_serovar_Typhi_strain_343077_281186_chromosome__complete_genome
MAIDENKQKALAAALGQIEKQFGKGSIMRLGEDRSMDVETISTGSLSLDIALGAGGLPMG
RIVEIYGPESSGKTTLTLQVIAAAQREGKTCAFIDAEHALDPVYARKLGVDIDNLLCSQP
DTGEQALEICDALARSGAVDVIVVDSVAALTPKAEIEGEIGDSHMGLAARMMSQAMRKLA
GNLKQSNTLLIFINQIRMKIGVMFGNPETTTGGNALKFYASVRLDIRRIGAVKEGDNVVG
SETRVKVVKNKIAAPFKQAEFQILYGEGINFYGELVDLGVKEKLIEKAGAWYSYNGEKIG
QGKANATTWLKENPATAKEIEKRVRELLLSNQNATPDFAVDDS--EGVAETNEDF--
>Salmonella_enterica_subsp._enterica_serovar_Montevideo_str._USDA-ARS-USMARC-1901__complete_genome
MAIDENKQKALAAALGQIEKQFGKGSIMRLGEDRSMDVETISTGSLSLDIALGAGGLPMG
RIVEIYGPESSGKTTLTLQVIAAAQREGKTCAFIDAEHALDPVYARKLGVDIDNLLCSQP
DTGEQALEICDALARSGAVDVIVVDSVAALTPKAEIEGEIGDSHMGLAARMMSQAMRKLA
GNLKQSNTLLIFINQIRMKIGVMFGNPETTTGGNALKFYASVRLDIRRIGAVKEGDNVVG
SETRVKVVKNKIAAPFKQAEFQILYGEGINFYGELVDLGVKEKLIEKAGAWYSYNGEKIG
QGKANATTWLKENPATAKEIEKRVRELLLSNQNATPDFAVDDS--EGVAETNEDF--
>Salmonella_enterica_subsp._enterica_serovar_Enteritidis_str._EC20110361__complete_genome
MAIDENKQKALAAALGQIEKQFGKGSIMRLGEDRSMDVETISTGSLSLDIALGAGGLPMG
RIVEIYGPESSGKTTLTLQVIAAAQREGKTCAFIDAEHALDPVYARKLGVDIDNLLCSQP
DTGEQALEICDALARSGAVDVIVVDSVAALTPKAEIEGEIGDSHMGLAARMMSQAMRKLA
GNLKQSNTLLIFINQIRMKIGVMFGNPETTTGGNALKFYASVRLDIRRIGAVKEGDNVVG
SETRVKVVKNKIAAPFKQAEFQILYGEGINFYGELVDLGVKEKLIEKAGAWYSYNGEKIG
QGKANATTWLKENPATAKEIEKRVRELLLSNQNATPDFAVDDS--EGVAETNEDF--
>Salmonella_enterica_subsp._enterica_serovar_Typhi_strain_343076_269157_chromosome__complete_genome
MAIDENKQKALAAALGQIEKQFGKGSIMRLGEDRSMDVETISTGSLSLDIALGAGGLPMG
RIVEIYGPESSGKTTLTLQVIAAAQREGKTCAFIDAEHALDPVYARKLGVDIDNLLCSQP
DTGEQALEICDALARSGAVDVIVVDSVAALTPKAEIEGEIGDSHMGLAARMMSQAMRKLA
GNLKQSNTLLIFINQIRMKIGVMFGNPETTTGGNALKFYASVRLDIRRIGAVKEGDNVVG
SETRVKVVKNKIAAPFKQAEFQILYGEGINFYGELVDLGVKEKLIEKAGAWYSYNGEKIG
QGKANATTWLKENPATAKEIEKRVRELLLSNQNATPDFAVDDS--EGVAETNEDF--
>Salmonella_enterica_subsp._enterica_serovar_Enteritidis_str._77-1427__complete_genome
MAIDENKQKALAAALGQIEKQFGKGSIMRLGEDRSMDVETISTGSLSLDIALGAGGLPMG
RIVEIYGPESSGKTTLTLQVIAAAQREGKTCAFIDAEHALDPVYARKLGVDIDNLLCSQP
DTGEQALEICDALARSGAVDVIVVDSVAALTPKAEIEGEIGDSHMGLAARMMSQAMRKLA
GNLKQSNTLLIFINQIRMKIGVMFGNPETTTGGNALKFYASVRLDIRRIGAVKEGDNVVG
SETRVKVVKNKIAAPFKQAEFQILYGEGINFYGELVDLGVKEKLIEKAGAWYSYNGEKIG
QGKANATTWLKENPATAKEIEKRVRELLLSNQNATPDFAVDDS--EGVAETNEDF--
>Salmonella_enterica_subsp._enterica_serovar_Typhi_strain_PM016
MAIDENKQKALAAALGQIEKQFGKGSIMRLGEDRSMDVETISTGSLSLDIALGAGGLPMG
RIVEIYGPESSGKTTLTLQVIAAAQREGKTCAFIDAEHALDPVYARKLGVDIDNLLCSQP
DTGEQALEICDALARSGAVDVIVVDSVAALTPKAEIEGEIGDSHMGLAARMMSQAMRKLA
GNLKQSNTLLIFINQIRMKIGVMFGNPETTTGGNALKFYASVRLDIRRIGAVKEGDNVVG
SETRVKVVKNKIAAPFKQAEFQILYGEGINFYGELVDLGVKEKLIEKAGAWYSYNGEKIG
QGKANATTWLKENPATAKEIEKRVRELLLSNQNATPDFAVDDS--EGVAETNEDF--
>Salmonella_enterica_subsp._enterica_serovar_Typhimurium_strain_TJWQ005_chromosome__complete_genome
MAIDENKQKALAAALGQIEKQFGKGSIMRLGEDRSMDVETISTGSLSLDIALGAGGLPMG
RIVEIYGPESSGKTTLTLQVIAAAQREGKTCAFIDAEHALDPVYARKLGVDIDNLLCSQP
DTGEQALEICDALARSGAVDVIVVDSVAALTPKAEIEGEIGDSHMGLAARMMSQAMRKLA
GNLKQSNTLLIFINQIRMKIGVMFGNPETTTGGNALKFYASVRLDIRRIGAVKEGDNVVG
SETRVKVVKNKIAAPFKQAEFQILYGEGINFYGELVDLGVKEKLIEKAGAWYSYNGEKIG
QGKANATTWLKENPATAKEIEKRVRELLLSNQNATPDFAVDDS--EGVAETNEDF--
>Salmonella_enterica_subsp._enterica_serovar_Enteritidis_str._EC20120005__complete_genome
MAIDENKQKALAAALGQIEKQFGKGSIMRLGEDRSMDVETISTGSLSLDIALGAGGLPMG
RIVEIYGPESSGKTTLTLQVIAAAQREGKTCAFIDAEHALDPVYARKLGVDIDNLLCSQP
DTGEQALEICDALARSGAVDVIVVDSVAALTPKAEIEGEIGDSHMGLAARMMSQAMRKLA
GNLKQSNTLLIFINQIRMKIGVMFGNPETTTGGNALKFYASVRLDIRRIGAVKEGDNVVG
SETRVKVVKNKIAAPFKQAEFQILYGEGINFYGELVDLGVKEKLIEKAGAWYSYNGEKIG
QGKANATTWLKENPATAKEIEKRVRELLLSNQNATPDFAVDDS--EGVAETNEDF--
>Salmonella_enterica_subsp._enterica_serovar_Typhimurium_strain_13-931__complete_genome
MAIDENKQKALAAALGQIEKQFGKGSIMRLGEDRSMDVETISTGSLSLDIALGAGGLPMG
RIVEIYGPESSGKTTLTLQVIAAAQREGKTCAFIDAEHALDPVYARKLGVDIDNLLCSQP
DTGEQALEICDALARSGAVDVIVVDSVAALTPKAEIEGEIGDSHMGLAARMMSQAMRKLA
GNLKQSNTLLIFINQIRMKIGVMFGNPETTTGGNALKFYASVRLDIRRIGAVKEGDNVVG
SETRVKVVKNKIAAPFKQAEFQILYGEGINFYGELVDLGVKEKLIEKAGAWYSYNGEKIG
QGKANATTWLKENPATAKEIEKRVRELLLSNQNATPDFAVDDS--EGVAETNEDF--
>Salmonella_enterica_subsp._enterica_serovar_Heidelberg_strain_AMR588-04-00437_chromosome__complete_genome
MAIDENKQKALAAALGQIEKQFGKGSIMRLGEDRSMDVETISTGSLSLDIALGAGGLPMG
RIVEIYGPESSGKTTLTLQVIAAAQREGKTCAFIDAEHALDPVYARKLGVDIDNLLCSQP
DTGEQALEICDALARSGAVDVIVVDSVAALTPKAEIEGEIGDSHMGLAARMMSQAMRKLA
GNLKQSNTLLIFINQIRMKIGVMFGNPETTTGGNALKFYASVRLDIRRIGAVKEGDNVVG
SETRVKVVKNKIAAPFKQAEFQILYGEGINFYGELVDLGVKEKLIEKAGAWYSYNGEKIG
QGKANATTWLKENPATAKEIEKRVRELLLSNQNATPDFAVDDS--EGVAETNEDF--
>Salmonella_enterica_subsp._enterica_serovar_Typhimurium_strain_16425992_chromosome__complete_genome
MAIDENKQKALAAALGQIEKQFGKGSIMRLGEDRSMDVETISTGSLSLDIALGAGGLPMG
RIVEIYGPESSGKTTLTLQVIAAAQREGKTCAFIDAEHALDPVYARKLGVDIDNLLCSQP
DTGEQALEICDALARSGAVDVIVVDSVAALTPKAEIEGEIGDSHMGLAARMMSQAMRKLA
GNLKQSNTLLIFINQIRMKIGVMFGNPETTTGGNALKFYASVRLDIRRIGAVKEGDNVVG
SETRVKVVKNKIAAPFKQAEFQILYGEGINFYGELVDLGVKEKLIEKAGAWYSYNGEKIG
QGKANATTWLKENPATAKEIEKRVRELLLSNQNATPDFAVDDS--EGVAETNEDF--
>Salmonella_enterica_subsp._enterica_serovar_Agona_strain_USDA-ARS-USMARC-76340_chromosome__complete_genome
MAIDENKQKALAAALGQIEKQFGKGSIMRLGEDRSMDVETISTGSLSLDIALGAGGLPMG
RIVEIYGPESSGKTTLTLQVIAAAQREGKTCAFIDAEHALDPVYARKLGVDIDNLLCSQP
DTGEQALEICDALARSGAVDVIVVDSVAALTPKAEIEGEIGDSHMGLAARMMSQAMRKLA
GNLKQSNTLLIFINQIRMKIGVMFGNPETTTGGNALKFYASVRLDIRRIGAVKEGDNVVG
SETRVKVVKNKIAAPFKQAEFQILYGEGINFYGELVDLGVKEKLIEKAGAWYSYNGEKIG
QGKANATTWLKENPATAKEIEKRVRELLLSNQNATPDFAVDDS--EGVAETNEDF--
>Salmonella_enterica_subsp._enterica_serovar_Javiana_strain_FARPER-220_chromosome__complete_genome
MAIDENKQKALAAALGQIEKQFGKGSIMRLGEDRSMDVETISTGSLSLDIALGAGGLPMG
RIVEIYGPESSGKTTLTLQVIAAAQREGKTCAFIDAEHALDPVYARKLGVDIDNLLCSQP
DTGEQALEICDALARSGAVDVIVVDSVAALTPKAEIEGEIGDSHMGLAARMMSQAMRKLA
GNLKQSNTLLIFINQIRMKIGVMFGNPETTTGGNALKFYASVRLDIRRIGAVKEGDNVVG
SETRVKVVKNKIAAPFKQAEFQILYGEGINFYGELVDLGVKEKLIEKAGAWYSYNGEKIG
QGKANATTWLKENPATAKEIEKRVRELLLSNQNATPDFAVDDS--EGVAETNEDF--
>Salmonella_enterica_subsp._enterica_serovar_Typhimurium_str._14028S_substr._GXS259_chromosome__complete_genome
MAIDENKQKALAAALGQIEKQFGKGSIMRLGEDRSMDVETISTGSLSLDIALGAGGLPMG
RIVEIYGPESSGKTTLTLQVIAAAQREGKTCAFIDAEHALDPVYARKLGVDIDNLLCSQP
DTGEQALEICDALARSGAVDVIVVDSVAALTPKAEIEGEIGDSHMGLAARMMSQAMRKLA
GNLKQSNTLLIFINQIRMKIGVMFGNPETTTGGNALKFYASVRLDIRRIGAVKEGDNVVG
SETRVKVVKNKIAAPFKQAEFQILYGEGINFYGELVDLGVKEKLIEKAGAWYSYNGEKIG
QGKANATTWLKENPATAKEIEKRVRELLLSNQNATPDFAVDDS--EGVAETNEDF--
>Salmonella_enterica_subsp._enterica_strain_CFSA629_chromosome__complete_genome
MAIDENKQKALAAALGQIEKQFGKGSIMRLGEDRSMDVETISTGSLSLDIALGAGGLPMG
RIVEIYGPESSGKTTLTLQVIAAAQREGKTCAFIDAEHALDPVYARKLGVDIDNLLCSQP
DTGEQALEICDALARSGAVDVIVVDSVAALTPKAEIEGEIGDSHMGLAARMMSQAMRKLA
GNLKQSNTLLIFINQIRMKIGVMFGNPETTTGGNALKFYASVRLDIRRIGAVKEGDNVVG
SETRVKVVKNKIAAPFKQAEFQILYGEGINFYGELVDLGVKEKLIEKAGAWYSYNGEKIG
QGKANATTWLKENPATAKEIEKRVRELLLSNQNATPDFAVDDS--EGVAETNEDF--
>Salmonella_enterica_subsp._enterica_strain_16C0703578_chromosome__complete_genome
MAIDENKQKALAAALGQIEKQFGKGSIMRLGEDRSMDVETISTGSLSLDIALGAGGLPMG
RIVEIYGPESSGKTTLTLQVIAAAQREGKTCAFIDAEHALDPVYARKLGVDIDNLLCSQP
DTGEQALEICDALARSGAVDVIVVDSVAALTPKAEIEGEIGDSHMGLAARMMSQAMRKLA
GNLKQSNTLLIFINQIRMKIGVMFGNPETTTGGNALKFYASVRLDIRRIGAVKEGDNVVG
SETRVKVVKNKIAAPFKQAEFQILYGEGINFYGELVDLGVKEKLIEKAGAWYSYNGEKIG
QGKANATTWLKENPATAKEIEKRVRELLLSNQNATPDFAVDDS--EGVAETNEDF--
>Salmonella_enterica_strain_SA20094620_chromosome__complete_genome
MAIDENKQKALAAALGQIEKQFGKGSIMRLGEDRSMDVETISTGSLSLDIALGAGGLPMG
RIVEIYGPESSGKTTLTLQVIAAAQREGKTCAFIDAEHALDPVYARKLGVDIDNLLCSQP
DTGEQALEICDALARSGAVDVIVVDSVAALTPKAEIEGEIGDSHMGLAARMMSQAMRKLA
GNLKQSNTLLIFINQIRMKIGVMFGNPETTTGGNALKFYASVRLDIRRIGAVKEGDNVVG
SETRVKVVKNKIAAPFKQAEFQILYGEGINFYGELVDLGVKEKLIEKAGAWYSYNGEKIG
QGKANATTWLKENPATAKEIEKRVRELLLSNQNATPDFAVDDS--EGVAETNEDF--
>Salmonella_enterica_subsp._enterica_strain_CFSA231_chromosome__complete_genome
MAIDENKQKALAAALGQIEKQFGKGSIMRLGEDRSMDVETISTGSLSLDIALGAGGLPMG
RIVEIYGPESSGKTTLTLQVIAAAQREGKTCAFIDAEHALDPVYARKLGVDIDNLLCSQP
DTGEQALEICDALARSGAVDVIVVDSVAALTPKAEIEGEIGDSHMGLAARMMSQAMRKLA
GNLKQSNTLLIFINQIRMKIGVMFGNPETTTGGNALKFYASVRLDIRRIGAVKEGDNVVG
SETRVKVVKNKIAAPFKQAEFQILYGEGINFYGELVDLGVKEKLIEKAGAWYSYNGEKIG
QGKANATTWLKENPATAKEIEKRVRELLLSNQNATPDFAVDDS--EGVAETNEDF--
>Salmonella_enterica_subsp._enterica_serovar_Montevideo_str._USDA-ARS-USMARC-1903__complete_genome
MAIDENKQKALAAALGQIEKQFGKGSIMRLGEDRSMDVETISTGSLSLDIALGAGGLPMG
RIVEIYGPESSGKTTLTLQVIAAAQREGKTCAFIDAEHALDPVYARKLGVDIDNLLCSQP
DTGEQALEICDALARSGAVDVIVVDSVAALTPKAEIEGEIGDSHMGLAARMMSQAMRKLA
GNLKQSNTLLIFINQIRMKIGVMFGNPETTTGGNALKFYASVRLDIRRIGAVKEGDNVVG
SETRVKVVKNKIAAPFKQAEFQILYGEGINFYGELVDLGVKEKLIEKAGAWYSYNGEKIG
QGKANATTWLKENPATAKEIEKRVRELLLSNQNATPDFAVDDS--EGVAETNEDF--
>Salmonella_enterica_subsp._enterica_serovar_Typhi_strain_B
MAIDENKQKALAAALGQIEKQFGKGSIMRLGEDRSMDVETISTGSLSLDIALGAGGLPMG
RIVEIYGPESSGKTTLTLQVIAAAQREGKTCAFIDAEHALDPVYARKLGVDIDNLLCSQP
DTGEQALEICDALARSGAVDVIVVDSVAALTPKAEIEGEIGDSHMGLAARMMSQAMRKLA
GNLKQSNTLLIFINQIRMKIGVMFGNPETTTGGNALKFYASVRLDIRRIGAVKEGDNVVG
SETRVKVVKNKIAAPFKQAEFQILYGEGINFYGELVDLGVKEKLIEKAGAWYSYNGEKIG
QGKANATTWLKENPATAKEIEKRVRELLLSNQNATPDFAVDDS--EGVAETNEDF--
>Salmonella_enterica_subsp._enterica_strain_E2640147322_chromosome__complete_genome
MAIDENKQKALAAALGQIEKQFGKGSIMRLGEDRSMDVETISTGSLSLDIALGAGGLPMG
RIVEIYGPESSGKTTLTLQVIAAAQREGKTCAFIDAEHALDPVYARKLGVDIDNLLCSQP
DTGEQALEICDALARSGAVDVIVVDSVAALTPKAEIEGEIGDSHMGLAARMMSQAMRKLA
GNLKQSNTLLIFINQIRMKIGVMFGNPETTTGGNALKFYASVRLDIRRIGAVKEGDNVVG
SETRVKVVKNKIAAPFKQAEFQILYGEGINFYGELVDLGVKEKLIEKAGAWYSYNGEKIG
QGKANATTWLKENPATAKEIEKRVRELLLSNQNATPDFAVDDS--EGVAETNEDF--
>Salmonella_enterica_subsp._enterica_serovar_Bredeney_str._CFSAN001080__complete_genome
MAIDENKQKALAAALGQIEKQFGKGSIMRLGEDRSMDVETISTGSLSLDIALGAGGLPMG
RIVEIYGPESSGKTTLTLQVIAAAQREGKTCAFIDAEHALDPVYARKLGVDIDNLLCSQP
DTGEQALEICDALARSGAVDVIVVDSVAALTPKAEIEGEIGDSHMGLAARMMSQAMRKLA
GNLKQSNTLLIFINQIRMKIGVMFGNPETTTGGNALKFYASVRLDIRRIGAVKEGDNVVG
SETRVKVVKNKIAAPFKQAEFQILYGEGINFYGELVDLGVKEKLIEKAGAWYSYNGEKIG
QGKANATTWLKENPATAKEIEKRVRELLLSNQNATPDFAVDDS--EGVAETNEDF--
>Salmonella_enterica_subsp._enterica_serovar_Bareilly_str._CFSAN000753_chromosome__complete_genome
MAIDENKQKALAAALGQIEKQFGKGSIMRLGEDRSMDVETISTGSLSLDIALGAGGLPMG
RIVEIYGPESSGKTTLTLQVIAAAQREGKTCAFIDAEHALDPVYARKLGVDIDNLLCSQP
DTGEQALEICDALARSGAVDVIVVDSVAALTPKAEIEGEIGDSHMGLAARMMSQAMRKLA
GNLKQSNTLLIFINQIRMKIGVMFGNPETTTGGNALKFYASVRLDIRRIGAVKEGDNVVG
SETRVKVVKNKIAAPFKQAEFQILYGEGINFYGELVDLGVKEKLIEKAGAWYSYNGEKIG
QGKANATTWLKENPATAKEIEKRVRELLLSNQNATPDFAVDDS--EGVAETNEDF--
>Salmonella_enterica_subsp._enterica_strain_ID105460_chromosome__complete_genome
MAIDENKQKALAAALGQIEKQFGKGSIMRLGEDRSMDVETISTGSLSLDIALGAGGLPMG
RIVEIYGPESSGKTTLTLQVIAAAQREGKTCAFIDAEHALDPVYARKLGVDIDNLLCSQP
DTGEQALEICDALARSGAVDVIVVDSVAALTPKAEIEGEIGDSHMGLAARMMSQAMRKLA
GNLKQSNTLLIFINQIRMKIGVMFGNPETTTGGNALKFYASVRLDIRRIGAVKEGDNVVG
SETRVKVVKNKIAAPFKQAEFQILYGEGINFYGELVDLGVKEKLIEKAGAWYSYNGEKIG
QGKANATTWLKENPATAKEIEKRVRELLLSNQNATPDFAVDDS--EGVAETNEDF--
>Salmonella_enterica_subsp._enterica_serovar_Typhi_strain_343077_292148_chromosome__complete_genome
MAIDENKQKALAAALGQIEKQFGKGSIMRLGEDRSMDVETISTGSLSLDIALGAGGLPMG
RIVEIYGPESSGKTTLTLQVIAAAQREGKTCAFIDAEHALDPVYARKLGVDIDNLLCSQP
DTGEQALEICDALARSGAVDVIVVDSVAALTPKAEIEGEIGDSHMGLAARMMSQAMRKLA
GNLKQSNTLLIFINQIRMKIGVMFGNPETTTGGNALKFYASVRLDIRRIGAVKEGDNVVG
SETRVKVVKNKIAAPFKQAEFQILYGEGINFYGELVDLGVKEKLIEKAGAWYSYNGEKIG
QGKANATTWLKENPATAKEIEKRVRELLLSNQNATPDFAVDDS--EGVAETNEDF--
>Salmonella_enterica_subsp._enterica_serovar_Typhimurium_var._5-_strain_CFSAN067216_chromosome__complete_genome
MAIDENKQKALAAALGQIEKQFGKGSIMRLGEDRSMDVETISTGSLSLDIALGAGGLPMG
RIVEIYGPESSGKTTLTLQVIAAAQREGKTCAFIDAEHALDPVYARKLGVDIDNLLCSQP
DTGEQALEICDALARSGAVDVIVVDSVAALTPKAEIEGEIGDSHMGLAARMMSQAMRKLA
GNLKQSNTLLIFINQIRMKIGVMFGNPETTTGGNALKFYASVRLDIRRIGAVKEGDNVVG
SETRVKVVKNKIAAPFKQAEFQILYGEGINFYGELVDLGVKEKLIEKAGAWYSYNGEKIG
QGKANATTWLKENPATAKEIEKRVRELLLSNQNATPDFAVDDS--EGVAETNEDF--
>Salmonella_enterica_subsp._enterica_serovar_Typhi_strain_343076_227128_chromosome__complete_genome
MAIDENKQKALAAALGQIEKQFGKGSIMRLGEDRSMDVETISTGSLSLDIALGAGGLPMG
RIVEIYGPESSGKTTLTLQVIAAAQREGKTCAFIDAEHALDPVYARKLGVDIDNLLCSQP
DTGEQALEICDALARSGAVDVIVVDSVAALTPKAEIEGEIGDSHMGLAARMMSQAMRKLA
GNLKQSNTLLIFINQIRMKIGVMFGNPETTTGGNALKFYASVRLDIRRIGAVKEGDNVVG
SETRVKVVKNKIAAPFKQAEFQILYGEGINFYGELVDLGVKEKLIEKAGAWYSYNGEKIG
QGKANATTWLKENPATAKEIEKRVRELLLSNQNATPDFAVDDS--EGVAETNEDF--
>Salmonella_enterica_subsp._enterica_serovar_Typhi_strain_311189_255186_chromosome__complete_genome
MAIDENKQKALAAALGQIEKQFGKGSIMRLGEDRSMDVETISTGSLSLDIALGAGGLPMG
RIVEIYGPESSGKTTLTLQVIAAAQREGKTCAFIDAEHALDPVYARKLGVDIDNLLCSQP
DTGEQALEICDALARSGAVDVIVVDSVAALTPKAEIEGEIGDSHMGLAARMMSQAMRKLA
GNLKQSNTLLIFINQIRMKIGVMFGNPETTTGGNALKFYASVRLDIRRIGAVKEGDNVVG
SETRVKVVKNKIAAPFKQAEFQILYGEGINFYGELVDLGVKEKLIEKAGAWYSYNGEKIG
QGKANATTWLKENPATAKEIEKRVRELLLSNQNATPDFAVDDS--EGVAETNEDF--
>Salmonella_enterica_subsp._enterica_serovar_Indiana_strain_SJTUF87912v2_isolate_food_chromosome__complete_genome
MAIDENKQKALAAALGQIEKQFGKGSIMRLGEDRSMDVETISTGSLSLDIALGAGGLPMG
RIVEIYGPESSGKTTLTLQVIAAAQREGKTCAFIDAEHALDPVYARKLGVDIDNLLCSQP
DTGEQALEICDALARSGAVDVIVVDSVAALTPKAEIEGEIGDSHMGLAARMMSQAMRKLA
GNLKQSNTLLIFINQIRMKIGVMFGNPETTTGGNALKFYASVRLDIRRIGAVKEGDNVVG
SETRVKVVKNKIAAPFKQAEFQILYGEGINFYGELVDLGVKEKLIEKAGAWYSYNGEKIG
QGKANATTWLKENPATAKEIEKRVRELLLSNQNATPDFAVDDS--EGVAETNEDF--
>Salmonella_enterica_subsp._enterica_serovar_Heidelberg_strain_11-004736-1-7_chromosome__complete_genome
MAIDENKQKALAAALGQIEKQFGKGSIMRLGEDRSMDVETISTGSLSLDIALGAGGLPMG
RIVEIYGPESSGKTTLTLQVIAAAQREGKTCAFIDAEHALDPVYARKLGVDIDNLLCSQP
DTGEQALEICDALARSGAVDVIVVDSVAALTPKAEIEGEIGDSHMGLAARMMSQAMRKLA
GNLKQSNTLLIFINQIRMKIGVMFGNPETTTGGNALKFYASVRLDIRRIGAVKEGDNVVG
SETRVKVVKNKIAAPFKQAEFQILYGEGINFYGELVDLGVKEKLIEKAGAWYSYNGEKIG
QGKANATTWLKENPATAKEIEKRVRELLLSNQNATPDFAVDDS--EGVAETNEDF--
>Salmonella_enterica_subsp._enterica_serovar_Typhimurium_var._5-_strain_CFSAN067217_chromosome__complete_genome
MAIDENKQKALAAALGQIEKQFGKGSIMRLGEDRSMDVETISTGSLSLDIALGAGGLPMG
RIVEIYGPESSGKTTLTLQVIAAAQREGKTCAFIDAEHALDPVYARKLGVDIDNLLCSQP
DTGEQALEICDALARSGAVDVIVVDSVAALTPKAEIEGEIGDSHMGLAARMMSQAMRKLA
GNLKQSNTLLIFINQIRMKIGVMFGNPETTTGGNALKFYASVRLDIRRIGAVKEGDNVVG
SETRVKVVKNKIAAPFKQAEFQILYGEGINFYGELVDLGVKEKLIEKAGAWYSYNGEKIG
QGKANATTWLKENPATAKEIEKRVRELLLSNQNATPDFAVDDS--EGVAETNEDF--
>Salmonella_enterica_subsp._enterica_serovar_Typhimurium_strain_10ST07093_chromosome__complete_genome
MAIDENKQKALAAALGQIEKQFGKGSIMRLGEDRSMDVETISTGSLSLDIALGAGGLPMG
RIVEIYGPESSGKTTLTLQVIAAAQREGKTCAFIDAEHALDPVYARKLGVDIDNLLCSQP
DTGEQALEICDALARSGAVDVIVVDSVAALTPKAEIEGEIGDSHMGLAARMMSQAMRKLA
GNLKQSNTLLIFINQIRMKIGVMFGNPETTTGGNALKFYASVRLDIRRIGAVKEGDNVVG
SETRVKVVKNKIAAPFKQAEFQILYGEGINFYGELVDLGVKEKLIEKAGAWYSYNGEKIG
QGKANATTWLKENPATAKEIEKRVRELLLSNQNATPDFAVDDS--EGVAETNEDF--
>Salmonella_enterica_subsp._enterica_serovar_Choleraesuis_str._SC-B67__complete_genome
MAIDENKQKALAAALGQIEKQFGKGSIMRLGEDRSMDVETISTGSLSLDIALGAGGLPMG
RIVEIYGPESSGKTTLTLQVIAAAQREGKTCAFIDAEHALDPVYARKLGVDIDNLLCSQP
DTGEQALEICDALARSGAVDVIVVDSVAALTPKAEIEGEIGDSHMGLAARMMSQAMRKLA
GNLKQSNTLLIFINQIRMKIGVMFGNPETTTGGNALKFYASVRLDIRRIGAVKEGDNVVG
SETRVKVVKNKIAAPFKQAEFQILYGEGINFYGELVDLGVKEKLIEKAGAWYSYNGEKIG
QGKANATTWLKENPATAKEIEKRVRELLLSNQNATPDFAVDDS--EGVAETNEDF--
>Salmonella_enterica_subsp._enterica_serovar_Typhi_strain_LXYSH_chromosome__complete_genome
MAIDENKQKALAAALGQIEKQFGKGSIMRLGEDRSMDVETISTGSLSLDIALGAGGLPMG
RIVEIYGPESSGKTTLTLQVIAAAQREGKTCAFIDAEHALDPVYARKLGVDIDNLLCSQP
DTGEQALEICDALARSGAVDVIVVDSVAALTPKAEIEGEIGDSHMGLAARMMSQAMRKLA
GNLKQSNTLLIFINQIRMKIGVMFGNPETTTGGNALKFYASVRLDIRRIGAVKEGDNVVG
SETRVKVVKNKIAAPFKQAEFQILYGEGINFYGELVDLGVKEKLIEKAGAWYSYNGEKIG
QGKANATTWLKENPATAKEIEKRVRELLLSNQNATPDFAVDDS--EGVAETNEDF--
>Salmonella_enterica_subsp._enterica_serovar_Heidelberg_strain_N13-01290__complete_genome
MAIDENKQKALAAALGQIEKQFGKGSIMRLGEDRSMDVETISTGSLSLDIALGAGGLPMG
RIVEIYGPESSGKTTLTLQVIAAAQREGKTCAFIDAEHALDPVYARKLGVDIDNLLCSQP
DTGEQALEICDALARSGAVDVIVVDSVAALTPKAEIEGEIGDSHMGLAARMMSQAMRKLA
GNLKQSNTLLIFINQIRMKIGVMFGNPETTTGGNALKFYASVRLDIRRIGAVKEGDNVVG
SETRVKVVKNKIAAPFKQAEFQILYGEGINFYGELVDLGVKEKLIEKAGAWYSYNGEKIG
QGKANATTWLKENPATAKEIEKRVRELLLSNQNATPDFAVDDS--EGVAETNEDF--
>Salmonella_enterica_subsp._enterica_serovar_Newport_str._Levine_15__complete_genome
MAIDENKQKALAAALGQIEKQFGKGSIMRLGEDRSMDVETISTGSLSLDIALGAGGLPMG
RIVEIYGPESSGKTTLTLQVIAAAQREGKTCAFIDAEHALDPVYARKLGVDIDNLLCSQP
DTGEQALEICDALARSGAVDVIVVDSVAALTPKAEIEGEIGDSHMGLAARMMSQAMRKLA
GNLKQSNTLLIFINQIRMKIGVMFGNPETTTGGNALKFYASVRLDIRRIGAVKEGDNVVG
SETRVKVVKNKIAAPFKQAEFQILYGEGINFYGELVDLGVKEKLIEKAGAWYSYNGEKIG
QGKANATTWLKENPATAKEIEKRVRELLLSNQNATPDFAVDDS--EGVAETNEDF--
>Salmonella_enterica_subsp._enterica_serovar_Choleraesuis_strain_C500__complete_genome
MAIDENKQKALAAALGQIEKQFGKGSIMRLGEDRSMDVETISTGSLSLDIALGAGGLPMG
RIVEIYGPESSGKTTLTLQVIAAAQREGKTCAFIDAEHALDPVYARKLGVDIDNLLCSQP
DTGEQALEICDALARSGAVDVIVVDSVAALTPKAEIEGEIGDSHMGLAARMMSQAMRKLA
GNLKQSNTLLIFINQIRMKIGVMFGNPETTTGGNALKFYASVRLDIRRIGAVKEGDNVVG
SETRVKVVKNKIAAPFKQAEFQILYGEGINFYGELVDLGVKEKLIEKAGAWYSYNGEKIG
QGKANATTWLKENPATAKEIEKRVRELLLSNQNATPDFAVDDS--EGVAETNEDF--
>Salmonella_enterica_subsp._enterica_serovar_Braenderup_strain_FORC93_chromosome__complete_genome
MAIDENKQKALAAALGQIEKQFGKGSIMRLGEDRSMDVETISTGSLSLDIALGAGGLPMG
RIVEIYGPESSGKTTLTLQVIAAAQREGKTCAFIDAEHALDPVYARKLGVDIDNLLCSQP
DTGEQALEICDALARSGAVDVIVVDSVAALTPKAEIEGEIGDSHMGLAARMMSQAMRKLA
GNLKQSNTLLIFINQIRMKIGVMFGNPETTTGGNALKFYASVRLDIRRIGAVKEGDNVVG
SETRVKVVKNKIAAPFKQAEFQILYGEGINFYGELVDLGVKEKLIEKAGAWYSYNGEKIG
QGKANATTWLKENPATAKEIEKRVRELLLSNQNATPDFAVDDS--EGVAETNEDF--
>Salmonella_enterica_subsp._enterica_serovar_Enteritidis_str._SA19981522__complete_genome
MAIDENKQKALAAALGQIEKQFGKGSIMRLGEDRSMDVETISTGSLSLDIALGAGGLPMG
RIVEIYGPESSGKTTLTLQVIAAAQREGKTCAFIDAEHALDPVYARKLGVDIDNLLCSQP
DTGEQALEICDALARSGAVDVIVVDSVAALTPKAEIEGEIGDSHMGLAARMMSQAMRKLA
GNLKQSNTLLIFINQIRMKIGVMFGNPETTTGGNALKFYASVRLDIRRIGAVKEGDNVVG
SETRVKVVKNKIAAPFKQAEFQILYGEGINFYGELVDLGVKEKLIEKAGAWYSYNGEKIG
QGKANATTWLKENPATAKEIEKRVRELLLSNQNATPDFAVDDS--EGVAETNEDF--
>Salmonella_enterica_subsp._enterica_serovar_Cerro_str._CFSAN001588__complete_genome
MAIDENKQKALAAALGQIEKQFGKGSIMRLGEDRSMDVETISTGSLSLDIALGAGGLPMG
RIVEIYGPESSGKTTLTLQVIAAAQREGKTCAFIDAEHALDPVYARKLGVDIDNLLCSQP
DTGEQALEICDALARSGAVDVIVVDSVAALTPKAEIEGEIGDSHMGLAARMMSQAMRKLA
GNLKQSNTLLIFINQIRMKIGVMFGNPETTTGGNALKFYASVRLDIRRIGAVKEGDNVVG
SETRVKVVKNKIAAPFKQAEFQILYGEGINFYGELVDLGVKEKLIEKAGAWYSYNGEKIG
QGKANATTWLKENPATAKEIEKRVRELLLSNQNATPDFAVDDS--EGVAETNEDF--
>Salmonella_enterica_subsp._enterica_serovar_Heidelberg_strain_FDAARGOS_54_chromosome__complete_genome
MAIDENKQKALAAALGQIEKQFGKGSIMRLGEDRSMDVETISTGSLSLDIALGAGGLPMG
RIVEIYGPESSGKTTLTLQVIAAAQREGKTCAFIDAEHALDPVYARKLGVDIDNLLCSQP
DTGEQALEICDALARSGAVDVIVVDSVAALTPKAEIEGEIGDSHMGLAARMMSQAMRKLA
GNLKQSNTLLIFINQIRMKIGVMFGNPETTTGGNALKFYASVRLDIRRIGAVKEGDNVVG
SETRVKVVKNKIAAPFKQAEFQILYGEGINFYGELVDLGVKEKLIEKAGAWYSYNGEKIG
QGKANATTWLKENPATAKEIEKRVRELLLSNQNATPDFAVDDS--EGVAETNEDF--
>Salmonella_enterica_subsp._enterica_serovar_Rough_O_-_-_strain_10-8700_chromosome__complete_genome
MAIDENKQKALAAALGQIEKQFGKGSIMRLGEDRSMDVETISTGSLSLDIALGAGGLPMG
RIVEIYGPESSGKTTLTLQVIAAAQREGKTCAFIDAEHALDPVYARKLGVDIDNLLCSQP
DTGEQALEICDALARSGAVDVIVVDSVAALTPKAEIEGEIGDSHMGLAARMMSQAMRKLA
GNLKQSNTLLIFINQIRMKIGVMFGNPETTTGGNALKFYASVRLDIRRIGAVKEGDNVVG
SETRVKVVKNKIAAPFKQAEFQILYGEGINFYGELVDLGVKEKLIEKAGAWYSYNGEKIG
QGKANATTWLKENPATAKEIEKRVRELLLSNQNATPDFAVDDS--EGVAETNEDF--
>Salmonella_enterica_subsp._enterica_serovar_Enteritidis_strain_SJTUF12519v2_chromosome__complete_genome
MAIDENKQKALAAALGQIEKQFGKGSIMRLGEDRSMDVETISTGSLSLDIALGAGGLPMG
RIVEIYGPESSGKTTLTLQVIAAAQREGKTCAFIDAEHALDPVYARKLGVDIDNLLCSQP
DTGEQALEICDALARSGAVDVIVVDSVAALTPKAEIEGEIGDSHMGLAARMMSQAMRKLA
GNLKQSNTLLIFINQIRMKIGVMFGNPETTTGGNALKFYASVRLDIRRIGAVKEGDNVVG
SETRVKVVKNKIAAPFKQAEFQILYGEGINFYGELVDLGVKEKLIEKAGAWYSYNGEKIG
QGKANATTWLKENPATAKEIEKRVRELLLSNQNATPDFAVDDS--EGVAETNEDF--
>Salmonella_enterica_subsp._enterica_serovar_Typhi_strain_343077_260153_chromosome__complete_genome
MAIDENKQKALAAALGQIEKQFGKGSIMRLGEDRSMDVETISTGSLSLDIALGAGGLPMG
RIVEIYGPESSGKTTLTLQVIAAAQREGKTCAFIDAEHALDPVYARKLGVDIDNLLCSQP
DTGEQALEICDALARSGAVDVIVVDSVAALTPKAEIEGEIGDSHMGLAARMMSQAMRKLA
GNLKQSNTLLIFINQIRMKIGVMFGNPETTTGGNALKFYASVRLDIRRIGAVKEGDNVVG
SETRVKVVKNKIAAPFKQAEFQILYGEGINFYGELVDLGVKEKLIEKAGAWYSYNGEKIG
QGKANATTWLKENPATAKEIEKRVRELLLSNQNATPDFAVDDS--EGVAETNEDF--
>Salmonella_enterica_subsp._enterica_serovar_Heidelberg_strain_AR-0404_chromosome__complete_genome
MAIDENKQKALAAALGQIEKQFGKGSIMRLGEDRSMDVETISTGSLSLDIALGAGGLPMG
RIVEIYGPESSGKTTLTLQVIAAAQREGKTCAFIDAEHALDPVYARKLGVDIDNLLCSQP
DTGEQALEICDALARSGAVDVIVVDSVAALTPKAEIEGEIGDSHMGLAARMMSQAMRKLA
GNLKQSNTLLIFINQIRMKIGVMFGNPETTTGGNALKFYASVRLDIRRIGAVKEGDNVVG
SETRVKVVKNKIAAPFKQAEFQILYGEGINFYGELVDLGVKEKLIEKAGAWYSYNGEKIG
QGKANATTWLKENPATAKEIEKRVRELLLSNQNATPDFAVDDS--EGVAETNEDF--
>Salmonella_enterica_subsp._enterica_serovar_Newport_str._SL254__complete_genome
MAIDENKQKALAAALGQIEKQFGKGSIMRLGEDRSMDVETISTGSLSLDIALGAGGLPMG
RIVEIYGPESSGKTTLTLQVIAAAQREGKTCAFIDAEHALDPVYARKLGVDIDNLLCSQP
DTGEQALEICDALARSGAVDVIVVDSVAALTPKAEIEGEIGDSHMGLAARMMSQAMRKLA
GNLKQSNTLLIFINQIRMKIGVMFGNPETTTGGNALKFYASVRLDIRRIGAVKEGDNVVG
SETRVKVVKNKIAAPFKQAEFQILYGEGINFYGELVDLGVKEKLIEKAGAWYSYNGEKIG
QGKANATTWLKENPATAKEIEKRVRELLLSNQNATPDFAVDDS--EGVAETNEDF--
>Salmonella_enterica_subsp._enterica_serovar_Montevideo_str._USDA-ARS-USMARC-1912__complete_genome
MAIDENKQKALAAALGQIEKQFGKGSIMRLGEDRSMDVETISTGSLSLDIALGAGGLPMG
RIVEIYGPESSGKTTLTLQVIAAAQREGKTCAFIDAEHALDPVYARKLGVDIDNLLCSQP
DTGEQALEICDALARSGAVDVIVVDSVAALTPKAEIEGEIGDSHMGLAARMMSQAMRKLA
GNLKQSNTLLIFINQIRMKIGVMFGNPETTTGGNALKFYASVRLDIRRIGAVKEGDNVVG
SETRVKVVKNKIAAPFKQAEFQILYGEGINFYGELVDLGVKEKLIEKAGAWYSYNGEKIG
QGKANATTWLKENPATAKEIEKRVRELLLSNQNATPDFAVDDS--EGVAETNEDF--
>Salmonella_enterica_subsp._enterica_serovar_Agona_str._SL483__complete_genome
MAIDENKQKALAAALGQIEKQFGKGSIMRLGEDRSMDVETISTGSLSLDIALGAGGLPMG
RIVEIYGPESSGKTTLTLQVIAAAQREGKTCAFIDAEHALDPVYARKLGVDIDNLLCSQP
DTGEQALEICDALARSGAVDVIVVDSVAALTPKAEIEGEIGDSHMGLAARMMSQAMRKLA
GNLKQSNTLLIFINQIRMKIGVMFGNPETTTGGNALKFYASVRLDIRRIGAVKEGDNVVG
SETRVKVVKNKIAAPFKQAEFQILYGEGINFYGELVDLGVKEKLIEKAGAWYSYNGEKIG
QGKANATTWLKENPATAKEIEKRVRELLLSNQNATPDFAVDDS--EGVAETNEDF--
>Salmonella_enterica_subsp._enterica_serovar_Bareilly_str._CFSAN001118_chromosome__complete_genome
MAIDENKQKALAAALGQIEKQFGKGSIMRLGEDRSMDVETISTGSLSLDIALGAGGLPMG
RIVEIYGPESSGKTTLTLQVIAAAQREGKTCAFIDAEHALDPVYARKLGVDIDNLLCSQP
DTGEQALEICDALARSGAVDVIVVDSVAALTPKAEIEGEIGDSHMGLAARMMSQAMRKLA
GNLKQSNTLLIFINQIRMKIGVMFGNPETTTGGNALKFYASVRLDIRRIGAVKEGDNVVG
SETRVKVVKNKIAAPFKQAEFQILYGEGINFYGELVDLGVKEKLIEKAGAWYSYNGEKIG
QGKANATTWLKENPATAKEIEKRVRELLLSNQNATPDFAVDDS--EGVAETNEDF--
>Salmonella_enterica_subsp._enterica_serovar_Tennessee_strain_CFSAN070645_chromosome__complete_genome
MAIDENKQKALAAALGQIEKQFGKGSIMRLGEDRSMDVETISTGSLSLDIALGAGGLPMG
RIVEIYGPESSGKTTLTLQVIAAAQREGKTCAFIDAEHALDPVYARKLGVDIDNLLCSQP
DTGEQALEICDALARSGAVDVIVVDSVAALTPKAEIEGEIGDSHMGLAARMMSQAMRKLA
GNLKQSNTLLIFINQIRMKIGVMFGNPETTTGGNALKFYASVRLDIRRIGAVKEGDNVVG
SETRVKVVKNKIAAPFKQAEFQILYGEGINFYGELVDLGVKEKLIEKAGAWYSYNGEKIG
QGKANATTWLKENPATAKEIEKRVRELLLSNQNATPDFAVDDS--EGVAETNEDF--
>Salmonella_enterica_strain_QH_chromosome__complete_genome
MAIDENKQKALAAALGQIEKQFGKGSIMRLGEDRSMDVETISTGSLSLDIALGAGGLPMG
RIVEIYGPESSGKTTLTLQVIAAAQREGKTCAFIDAEHALDPVYARKLGVDIDNLLCSQP
DTGEQALEICDALARSGAVDVIVVDSVAALTPKAEIEGEIGDSHMGLAARMMSQAMRKLA
GNLKQSNTLLIFINQIRMKIGVMFGNPETTTGGNALKFYASVRLDIRRIGAVKEGDNVVG
SETRVKVVKNKIAAPFKQAEFQILYGEGINFYGELVDLGVKEKLIEKAGAWYSYNGEKIG
QGKANATTWLKENPATAKEIEKRVRELLLSNQNATPDFAVDDS--EGVAETNEDF--
>Salmonella_enterica_strain_CFSAN047866_chromosome__complete_genome
MAIDENKQKALAAALGQIEKQFGKGSIMRLGEDRSMDVETISTGSLSLDIALGAGGLPMG
RIVEIYGPESSGKTTLTLQVIAAAQREGKTCAFIDAEHALDPVYARKLGVDIDNLLCSQP
DTGEQALEICDALARSGAVDVIVVDSVAALTPKAEIEGEIGDSHMGLAARMMSQAMRKLA
GNLKQSNTLLIFINQIRMKIGVMFGNPETTTGGNALKFYASVRLDIRRIGAVKEGDNVVG
SETRVKVVKNKIAAPFKQAEFQILYGEGINFYGELVDLGVKEKLIEKAGAWYSYNGEKIG
QGKANATTWLKENPATAKEIEKRVRELLLSNQNATPDFAVDDS--EGVAETNEDF--
>Salmonella_enterica_subsp._enterica_serovar_Enteritidis_str._EC20121175__complete_genome
MAIDENKQKALAAALGQIEKQFGKGSIMRLGEDRSMDVETISTGSLSLDIALGAGGLPMG
RIVEIYGPESSGKTTLTLQVIAAAQREGKTCAFIDAEHALDPVYARKLGVDIDNLLCSQP
DTGEQALEICDALARSGAVDVIVVDSVAALTPKAEIEGEIGDSHMGLAARMMSQAMRKLA
GNLKQSNTLLIFINQIRMKIGVMFGNPETTTGGNALKFYASVRLDIRRIGAVKEGDNVVG
SETRVKVVKNKIAAPFKQAEFQILYGEGINFYGELVDLGVKEKLIEKAGAWYSYNGEKIG
QGKANATTWLKENPATAKEIEKRVRELLLSNQNATPDFAVDDS--EGVAETNEDF--
>Salmonella_enterica_subsp._enterica_serovar_1_4_[5]_12_i_-_strain_12-214-06665_chromosome__complete_genome
MAIDENKQKALAAALGQIEKQFGKGSIMRLGEDRSMDVETISTGSLSLDIALGAGGLPMG
RIVEIYGPESSGKTTLTLQVIAAAQREGKTCAFIDAEHALDPVYARKLGVDIDNLLCSQP
DTGEQALEICDALARSGAVDVIVVDSVAALTPKAEIEGEIGDSHMGLAARMMSQAMRKLA
GNLKQSNTLLIFINQIRMKIGVMFGNPETTTGGNALKFYASVRLDIRRIGAVKEGDNVVG
SETRVKVVKNKIAAPFKQAEFQILYGEGINFYGELVDLGVKEKLIEKAGAWYSYNGEKIG
QGKANATTWLKENPATAKEIEKRVRELLLSNQNATPDFAVDDS--EGVAETNEDF--
>Salmonella_enterica_subsp._enterica_serovar_Hvittingfoss_str._SA20014981_chromosome__complete_genome
MAIDENKQKALAAALGQIEKQFGKGSIMRLGEDRSMDVETISTGSLSLDIALGAGGLPMG
RIVEIYGPESSGKTTLTLQVIAAAQREGKTCAFIDAEHALDPVYARKLGVDIDNLLCSQP
DTGEQALEICDALARSGAVDVIVVDSVAALTPKAEIEGEIGDSHMGLAARMMSQAMRKLA
GNLKQSNTLLIFINQIRMKIGVMFGNPETTTGGNALKFYASVRLDIRRIGAVKEGDNVVG
SETRVKVVKNKIAAPFKQAEFQILYGEGINFYGELVDLGVKEKLIEKAGAWYSYNGEKIG
QGKANATTWLKENPATAKEIEKRVRELLLSNQNATPDFAVDDS--EGVAETNEDF--
>Salmonella_enterica_subsp._enterica_serovar_Waycross_strain_RSE24_chromosome__complete_genome
MAIDENKQKALAAALGQIEKQFGKGSIMRLGEDRSMDVETISTGSLSLDIALGAGGLPMG
RIVEIYGPESSGKTTLTLQVIAAAQREGKTCAFIDAEHALDPVYARKLGVDIDNLLCSQP
DTGEQALEICDALARSGAVDVIVVDSVAALTPKAEIEGEIGDSHMGLAARMMSQAMRKLA
GNLKQSNTLLIFINQIRMKIGVMFGNPETTTGGNALKFYASVRLDIRRIGAVKEGDNVVG
SETRVKVVKNKIAAPFKQAEFQILYGEGINFYGELVDLGVKEKLIEKAGAWYSYNGEKIG
QGKANATTWLKENPATAKEIEKRVRELLLSNQNATPDFAVDDS--EGVAETNEDF--
>Salmonella_enterica_subsp._enterica_serovar_Typhi_strain_343077_278127_chromosome__complete_genome
MAIDENKQKALAAALGQIEKQFGKGSIMRLGEDRSMDVETISTGSLSLDIALGAGGLPMG
RIVEIYGPESSGKTTLTLQVIAAAQREGKTCAFIDAEHALDPVYARKLGVDIDNLLCSQP
DTGEQALEICDALARSGAVDVIVVDSVAALTPKAEIEGEIGDSHMGLAARMMSQAMRKLA
GNLKQSNTLLIFINQIRMKIGVMFGNPETTTGGNALKFYASVRLDIRRIGAVKEGDNVVG
SETRVKVVKNKIAAPFKQAEFQILYGEGINFYGELVDLGVKEKLIEKAGAWYSYNGEKIG
QGKANATTWLKENPATAKEIEKRVRELLLSNQNATPDFAVDDS--EGVAETNEDF--
>Salmonella_enterica_subsp._enterica_serovar_Agona_str._24249__complete_genome
MAIDENKQKALAAALGQIEKQFGKGSIMRLGEDRSMDVETISTGSLSLDIALGAGGLPMG
RIVEIYGPESSGKTTLTLQVIAAAQREGKTCAFIDAEHALDPVYARKLGVDIDNLLCSQP
DTGEQALEICDALARSGAVDVIVVDSVAALTPKAEIEGEIGDSHMGLAARMMSQAMRKLA
GNLKQSNTLLIFINQIRMKIGVMFGNPETTTGGNALKFYASVRLDIRRIGAVKEGDNVVG
SETRVKVVKNKIAAPFKQAEFQILYGEGINFYGELVDLGVKEKLIEKAGAWYSYNGEKIG
QGKANATTWLKENPATAKEIEKRVRELLLSNQNATPDFAVDDS--EGVAETNEDF--
>Salmonella_enterica_subsp._enterica_strain_84833166_chromosome__complete_genome
MAIDENKQKALAAALGQIEKQFGKGSIMRLGEDRSMDVETISTGSLSLDIALGAGGLPMG
RIVEIYGPESSGKTTLTLQVIAAAQREGKTCAFIDAEHALDPVYARKLGVDIDNLLCSQP
DTGEQALEICDALARSGAVDVIVVDSVAALTPKAEIEGEIGDSHMGLAARMMSQAMRKLA
GNLKQSNTLLIFINQIRMKIGVMFGNPETTTGGNALKFYASVRLDIRRIGAVKEGDNVVG
SETRVKVVKNKIAAPFKQAEFQILYGEGINFYGELVDLGVKEKLIEKAGAWYSYNGEKIG
QGKANATTWLKENPATAKEIEKRVRELLLSNQNATPDFAVDDS--EGVAETNEDF--
>Salmonella_enterica_subsp._enterica_strain_CFSA122_chromosome__complete_genome
MAIDENKQKALAAALGQIEKQFGKGSIMRLGEDRSMDVETISTGSLSLDIALGAGGLPMG
RIVEIYGPESSGKTTLTLQVIAAAQREGKTCAFIDAEHALDPVYARKLGVDIDNLLCSQP
DTGEQALEICDALARSGAVDVIVVDSVAALTPKAEIEGEIGDSHMGLAARMMSQAMRKLA
GNLKQSNTLLIFINQIRMKIGVMFGNPETTTGGNALKFYASVRLDIRRIGAVKEGDNVVG
SETRVKVVKNKIAAPFKQAEFQILYGEGINFYGELVDLGVKEKLIEKAGAWYSYNGEKIG
QGKANATTWLKENPATAKEIEKRVRELLLSNQNATPDFAVDDS--EGVAETNEDF--
>Salmonella_enterica_subsp._enterica_serovar_Enteritidis_str._EC20110357__complete_genome
MAIDENKQKALAAALGQIEKQFGKGSIMRLGEDRSMDVETISTGSLSLDIALGAGGLPMG
RIVEIYGPESSGKTTLTLQVIAAAQREGKTCAFIDAEHALDPVYARKLGVDIDNLLCSQP
DTGEQALEICDALARSGAVDVIVVDSVAALTPKAEIEGEIGDSHMGLAARMMSQAMRKLA
GNLKQSNTLLIFINQIRMKIGVMFGNPETTTGGNALKFYASVRLDIRRIGAVKEGDNVVG
SETRVKVVKNKIAAPFKQAEFQILYGEGINFYGELVDLGVKEKLIEKAGAWYSYNGEKIG
QGKANATTWLKENPATAKEIEKRVRELLLSNQNATPDFAVDDS--EGVAETNEDF--
>Salmonella_enterica_subsp._enterica_serovar_Javiana_str._CFSAN001992__complete_genome
MAIDENKQKALAAALGQIEKQFGKGSIMRLGEDRSMDVETISTGSLSLDIALGAGGLPMG
RIVEIYGPESSGKTTLTLQVIAAAQREGKTCAFIDAEHALDPVYARKLGVDIDNLLCSQP
DTGEQALEICDALARSGAVDVIVVDSVAALTPKAEIEGEIGDSHMGLAARMMSQAMRKLA
GNLKQSNTLLIFINQIRMKIGVMFGNPETTTGGNALKFYASVRLDIRRIGAVKEGDNVVG
SETRVKVVKNKIAAPFKQAEFQILYGEGINFYGELVDLGVKEKLIEKAGAWYSYNGEKIG
QGKANATTWLKENPATAKEIEKRVRELLLSNQNATPDFAVDDS--EGVAETNEDF--
>Salmonella_enterica_subsp._enterica_serovar_Bareilly_str._CFSAN000669_chromosome__complete_genome
MAIDENKQKALAAALGQIEKQFGKGSIMRLGEDRSMDVETISTGSLSLDIALGAGGLPMG
RIVEIYGPESSGKTTLTLQVIAAAQREGKTCAFIDAEHALDPVYARKLGVDIDNLLCSQP
DTGEQALEICDALARSGAVDVIVVDSVAALTPKAEIEGEIGDSHMGLAARMMSQAMRKLA
GNLKQSNTLLIFINQIRMKIGVMFGNPETTTGGNALKFYASVRLDIRRIGAVKEGDNVVG
SETRVKVVKNKIAAPFKQAEFQILYGEGINFYGELVDLGVKEKLIEKAGAWYSYNGEKIG
QGKANATTWLKENPATAKEIEKRVRELLLSNQNATPDFAVDDS--EGVAETNEDF--
>Salmonella_enterica_subsp._enterica_serovar_Typhi_strain_343076_217103_chromosome__complete_genome
MAIDENKQKALAAALGQIEKQFGKGSIMRLGEDRSMDVETISTGSLSLDIALGAGGLPMG
RIVEIYGPESSGKTTLTLQVIAAAQREGKTCAFIDAEHALDPVYARKLGVDIDNLLCSQP
DTGEQALEICDALARSGAVDVIVVDSVAALTPKAEIEGEIGDSHMGLAARMMSQAMRKLA
GNLKQSNTLLIFINQIRMKIGVMFGNPETTTGGNALKFYASVRLDIRRIGAVKEGDNVVG
SETRVKVVKNKIAAPFKQAEFQILYGEGINFYGELVDLGVKEKLIEKAGAWYSYNGEKIG
QGKANATTWLKENPATAKEIEKRVRELLLSNQNATPDFAVDDS--EGVAETNEDF--
>Salmonella_enterica_subsp._enterica_serovar_Enteritidis_str._SA19960848__complete_genome
MAIDENKQKALAAALGQIEKQFGKGSIMRLGEDRSMDVETISTGSLSLDIALGAGGLPMG
RIVEIYGPESSGKTTLTLQVIAAAQREGKTCAFIDAEHALDPVYARKLGVDIDNLLCSQP
DTGEQALEICDALARSGAVDVIVVDSVAALTPKAEIEGEIGDSHMGLAARMMSQAMRKLA
GNLKQSNTLLIFINQIRMKIGVMFGNPETTTGGNALKFYASVRLDIRRIGAVKEGDNVVG
SETRVKVVKNKIAAPFKQAEFQILYGEGINFYGELVDLGVKEKLIEKAGAWYSYNGEKIG
QGKANATTWLKENPATAKEIEKRVRELLLSNQNATPDFAVDDS--EGVAETNEDF--
>Salmonella_enterica_subsp._enterica_serovar_Typhimurium_strain_YU15__complete_genome
MAIDENKQKALAAALGQIEKQFGKGSIMRLGEDRSMDVETISTGSLSLDIALGAGGLPMG
RIVEIYGPESSGKTTLTLQVIAAAQREGKTCAFIDAEHALDPVYARKLGVDIDNLLCSQP
DTGEQALEICDALARSGAVDVIVVDSVAALTPKAEIEGEIGDSHMGLAARMMSQAMRKLA
GNLKQSNTLLIFINQIRMKIGVMFGNPETTTGGNALKFYASVRLDIRRIGAVKEGDNVVG
SETRVKVVKNKIAAPFKQAEFQILYGEGINFYGELVDLGVKEKLIEKAGAWYSYNGEKIG
QGKANATTWLKENPATAKEIEKRVRELLLSNQNATPDFAVDDS--EGVAETNEDF--
>Salmonella_enterica_strain_3_isolate_CFSAN047349_chromosome__complete_genome
MAIDENKQKALAAALGQIEKQFGKGSIMRLGEDRSMDVETISTGSLSLDIALGAGGLPMG
RIVEIYGPESSGKTTLTLQVIAAAQREGKTCAFIDAEHALDPVYARKLGVDIDNLLCSQP
DTGEQALEICDALARSGAVDVIVVDSVAALTPKAEIEGEIGDSHMGLAARMMSQAMRKLA
GNLKQSNTLLIFINQIRMKIGVMFGNPETTTGGNALKFYASVRLDIRRIGAVKEGDNVVG
SETRVKVVKNKIAAPFKQAEFQILYGEGINFYGELVDLGVKEKLIEKAGAWYSYNGEKIG
QGKANATTWLKENPATAKEIEKRVRELLLSNQNATPDFAVDDS--EGVAETNEDF--
>Salmonella_enterica_subsp._enterica_serovar_Enteritidis_strain_OLF-SE6-00219-16__complete_genome
MAIDENKQKALAAALGQIEKQFGKGSIMRLGEDRSMDVETISTGSLSLDIALGAGGLPMG
RIVEIYGPESSGKTTLTLQVIAAAQREGKTCAFIDAEHALDPVYARKLGVDIDNLLCSQP
DTGEQALEICDALARSGAVDVIVVDSVAALTPKAEIEGEIGDSHMGLAARMMSQAMRKLA
GNLKQSNTLLIFINQIRMKIGVMFGNPETTTGGNALKFYASVRLDIRRIGAVKEGDNVVG
SETRVKVVKNKIAAPFKQAEFQILYGEGINFYGELVDLGVKEKLIEKAGAWYSYNGEKIG
QGKANATTWLKENPATAKEIEKRVRELLLSNQNATPDFAVDDS--EGVAETNEDF--
>Salmonella_enterica_subsp._enterica_serovar_Weltevreden_str._1655_chromosome__complete_genome
MAIDENKQKALAAALGQIEKQFGKGSIMRLGEDRSMDVETISTGSLSLDIALGAGGLPMG
RIVEIYGPESSGKTTLTLQVIAAAQREGKTCAFIDAEHALDPVYARKLGVDIDNLLCSQP
DTGEQALEICDALARSGAVDVIVVDSVAALTPKAEIEGEIGDSHMGLAARMMSQAMRKLA
GNLKQSNTLLIFINQIRMKIGVMFGNPETTTGGNALKFYASVRLDIRRIGAVKEGDNVVG
SETRVKVVKNKIAAPFKQAEFQILYGEGINFYGELVDLGVKEKLIEKAGAWYSYNGEKIG
QGKANATTWLKENPATAKEIEKRVRELLLSNQNATPDFAVDDS--EGVAETNEDF--
>Salmonella_enterica_subsp._enterica_serovar_Montevideo_strain_11TTUC-046_chromosome__complete_genome
MAIDENKQKALAAALGQIEKQFGKGSIMRLGEDRSMDVETISTGSLSLDIALGAGGLPMG
RIVEIYGPESSGKTTLTLQVIAAAQREGKTCAFIDAEHALDPVYARKLGVDIDNLLCSQP
DTGEQALEICDALARSGAVDVIVVDSVAALTPKAEIEGEIGDSHMGLAARMMSQAMRKLA
GNLKQSNTLLIFINQIRMKIGVMFGNPETTTGGNALKFYASVRLDIRRIGAVKEGDNVVG
SETRVKVVKNKIAAPFKQAEFQILYGEGINFYGELVDLGVKEKLIEKAGAWYSYNGEKIG
QGKANATTWLKENPATAKEIEKRVRELLLSNQNATPDFAVDDS--EGVAETNEDF--
>Salmonella_enterica_subsp._enterica_serovar_Enteritidis_str._EC20110354__complete_genome
MAIDENKQKALAAALGQIEKQFGKGSIMRLGEDRSMDVETISTGSLSLDIALGAGGLPMG
RIVEIYGPESSGKTTLTLQVIAAAQREGKTCAFIDAEHALDPVYARKLGVDIDNLLCSQP
DTGEQALEICDALARSGAVDVIVVDSVAALTPKAEIEGEIGDSHMGLAARMMSQAMRKLA
GNLKQSNTLLIFINQIRMKIGVMFGNPETTTGGNALKFYASVRLDIRRIGAVKEGDNVVG
SETRVKVVKNKIAAPFKQAEFQILYGEGINFYGELVDLGVKEKLIEKAGAWYSYNGEKIG
QGKANATTWLKENPATAKEIEKRVRELLLSNQNATPDFAVDDS--EGVAETNEDF--
>Salmonella_enterica_subsp._enterica_serovar_Thompson_strain_RM1984__complete_genome
MAIDENKQKALAAALGQIEKQFGKGSIMRLGEDRSMDVETISTGSLSLDIALGAGGLPMG
RIVEIYGPESSGKTTLTLQVIAAAQREGKTCAFIDAEHALDPVYARKLGVDIDNLLCSQP
DTGEQALEICDALARSGAVDVIVVDSVAALTPKAEIEGEIGDSHMGLAARMMSQAMRKLA
GNLKQSNTLLIFINQIRMKIGVMFGNPETTTGGNALKFYASVRLDIRRIGAVKEGDNVVG
SETRVKVVKNKIAAPFKQAEFQILYGEGINFYGELVDLGVKEKLIEKAGAWYSYNGEKIG
QGKANATTWLKENPATAKEIEKRVRELLLSNQNATPDFAVDDS--EGVAETNEDF--
>Salmonella_enterica_subsp._enterica_serovar_1_4_[5]_12_i_-_strain_SA20082869_chromosome__complete_genome
MAIDENKQKALAAALGQIEKQFGKGSIMRLGEDRSMDVETISTGSLSLDIALGAGGLPMG
RIVEIYGPESSGKTTLTLQVIAAAQREGKTCAFIDAEHALDPVYARKLGVDIDNLLCSQP
DTGEQALEICDALARSGAVDVIVVDSVAALTPKAEIEGEIGDSHMGLAARMMSQAMRKLA
GNLKQSNTLLIFINQIRMKIGVMFGNPETTTGGNALKFYASVRLDIRRIGAVKEGDNVVG
SETRVKVVKNKIAAPFKQAEFQILYGEGINFYGELVDLGVKEKLIEKAGAWYSYNGEKIG
QGKANATTWLKENPATAKEIEKRVRELLLSNQNATPDFAVDDS--EGVAETNEDF--
>Salmonella_enterica_subsp._enterica_serovar_Typhimurium_strain_FORC_020__complete_genome
MAIDENKQKALAAALGQIEKQFGKGSIMRLGEDRSMDVETISTGSLSLDIALGAGGLPMG
RIVEIYGPESSGKTTLTLQVIAAAQREGKTCAFIDAEHALDPVYARKLGVDIDNLLCSQP
DTGEQALEICDALARSGAVDVIVVDSVAALTPKAEIEGEIGDSHMGLAARMMSQAMRKLA
GNLKQSNTLLIFINQIRMKIGVMFGNPETTTGGNALKFYASVRLDIRRIGAVKEGDNVVG
SETRVKVVKNKIAAPFKQAEFQILYGEGINFYGELVDLGVKEKLIEKAGAWYSYNGEKIG
QGKANATTWLKENPATAKEIEKRVRELLLSNQNATPDFAVDDS--EGVAETNEDF--
>Salmonella_enterica_subsp._enterica_Serovar_Cubana_str._CFSAN002050__complete_genome
MAIDENKQKALAAALGQIEKQFGKGSIMRLGEDRSMDVETISTGSLSLDIALGAGGLPMG
RIVEIYGPESSGKTTLTLQVIAAAQREGKTCAFIDAEHALDPVYARKLGVDIDNLLCSQP
DTGEQALEICDALARSGAVDVIVVDSVAALTPKAEIEGEIGDSHMGLAARMMSQAMRKLA
GNLKQSNTLLIFINQIRMKIGVMFGNPETTTGGNALKFYASVRLDIRRIGAVKEGDNVVG
SETRVKVVKNKIAAPFKQAEFQILYGEGINFYGELVDLGVKEKLIEKAGAWYSYNGEKIG
QGKANATTWLKENPATAKEIEKRVRELLLSNQNATPDFAVDDS--EGVAETNEDF--
>Salmonella_enterica_subsp._enterica_serovar_Typhimurium_str._CDC_2009K-2059_chromosome__complete_genome
MAIDENKQKALAAALGQIEKQFGKGSIMRLGEDRSMDVETISTGSLSLDIALGAGGLPMG
RIVEIYGPESSGKTTLTLQVIAAAQREGKTCAFIDAEHALDPVYARKLGVDIDNLLCSQP
DTGEQALEICDALARSGAVDVIVVDSVAALTPKAEIEGEIGDSHMGLAARMMSQAMRKLA
GNLKQSNTLLIFINQIRMKIGVMFGNPETTTGGNALKFYASVRLDIRRIGAVKEGDNVVG
SETRVKVVKNKIAAPFKQAEFQILYGEGINFYGELVDLGVKEKLIEKAGAWYSYNGEKIG
QGKANATTWLKENPATAKEIEKRVRELLLSNQNATPDFAVDDS--EGVAETNEDF--
>Salmonella_enterica_subsp._enterica_serovar_Typhimurium_str._14028S_substr._GXS275_chromosome__complete_genome
MAIDENKQKALAAALGQIEKQFGKGSIMRLGEDRSMDVETISTGSLSLDIALGAGGLPMG
RIVEIYGPESSGKTTLTLQVIAAAQREGKTCAFIDAEHALDPVYARKLGVDIDNLLCSQP
DTGEQALEICDALARSGAVDVIVVDSVAALTPKAEIEGEIGDSHMGLAARMMSQAMRKLA
GNLKQSNTLLIFINQIRMKIGVMFGNPETTTGGNALKFYASVRLDIRRIGAVKEGDNVVG
SETRVKVVKNKIAAPFKQAEFQILYGEGINFYGELVDLGVKEKLIEKAGAWYSYNGEKIG
QGKANATTWLKENPATAKEIEKRVRELLLSNQNATPDFAVDDS--EGVAETNEDF--
>Salmonella_enterica_subsp._enterica_serovar_Typhimurium_strain_RM10961__complete_genome
MAIDENKQKALAAALGQIEKQFGKGSIMRLGEDRSMDVETISTGSLSLDIALGAGGLPMG
RIVEIYGPESSGKTTLTLQVIAAAQREGKTCAFIDAEHALDPVYARKLGVDIDNLLCSQP
DTGEQALEICDALARSGAVDVIVVDSVAALTPKAEIEGEIGDSHMGLAARMMSQAMRKLA
GNLKQSNTLLIFINQIRMKIGVMFGNPETTTGGNALKFYASVRLDIRRIGAVKEGDNVVG
SETRVKVVKNKIAAPFKQAEFQILYGEGINFYGELVDLGVKEKLIEKAGAWYSYNGEKIG
QGKANATTWLKENPATAKEIEKRVRELLLSNQNATPDFAVDDS--EGVAETNEDF--
>Salmonella_enterica_strain_FDA00009424_chromosome__complete_genome
MAIDENKQKALAAALGQIEKQFGKGSIMRLGEDRSMDVETISTGSLSLDIALGAGGLPMG
RIVEIYGPESSGKTTLTLQVIAAAQREGKTCAFIDAEHALDPVYARKLGVDIDNLLCSQP
DTGEQALEICDALARSGAVDVIVVDSVAALTPKAEIEGEIGDSHMGLAARMMSQAMRKLA
GNLKQSNTLLIFINQIRMKIGVMFGNPETTTGGNALKFYASVRLDIRRIGAVKEGDNVVG
SETRVKVVKNKIAAPFKQAEFQILYGEGINFYGELVDLGVKEKLIEKAGAWYSYNGEKIG
QGKANATTWLKENPATAKEIEKRVRELLLSNQNATPDFAVDDS--EGVAETNEDF--
>Salmonella_enterica_subsp._enterica_serovar_Bareilly_str._CFSAN000752_chromosome__complete_genome
MAIDENKQKALAAALGQIEKQFGKGSIMRLGEDRSMDVETISTGSLSLDIALGAGGLPMG
RIVEIYGPESSGKTTLTLQVIAAAQREGKTCAFIDAEHALDPVYARKLGVDIDNLLCSQP
DTGEQALEICDALARSGAVDVIVVDSVAALTPKAEIEGEIGDSHMGLAARMMSQAMRKLA
GNLKQSNTLLIFINQIRMKIGVMFGNPETTTGGNALKFYASVRLDIRRIGAVKEGDNVVG
SETRVKVVKNKIAAPFKQAEFQILYGEGINFYGELVDLGVKEKLIEKAGAWYSYNGEKIG
QGKANATTWLKENPATAKEIEKRVRELLLSNQNATPDFAVDDS--EGVAETNEDF--
>Salmonella_enterica_subsp._enterica_serovar_Enteritidis_strain_SEJ__complete_genome
MAIDENKQKALAAALGQIEKQFGKGSIMRLGEDRSMDVETISTGSLSLDIALGAGGLPMG
RIVEIYGPESSGKTTLTLQVIAAAQREGKTCAFIDAEHALDPVYARKLGVDIDNLLCSQP
DTGEQALEICDALARSGAVDVIVVDSVAALTPKAEIEGEIGDSHMGLAARMMSQAMRKLA
GNLKQSNTLLIFINQIRMKIGVMFGNPETTTGGNALKFYASVRLDIRRIGAVKEGDNVVG
SETRVKVVKNKIAAPFKQAEFQILYGEGINFYGELVDLGVKEKLIEKAGAWYSYNGEKIG
QGKANATTWLKENPATAKEIEKRVRELLLSNQNATPDFAVDDS--EGVAETNEDF--
>Salmonella_enterica_subsp._enterica_serovar_Heidelberg_str._41578__complete_genome
MAIDENKQKALAAALGQIEKQFGKGSIMRLGEDRSMDVETISTGSLSLDIALGAGGLPMG
RIVEIYGPESSGKTTLTLQVIAAAQREGKTCAFIDAEHALDPVYARKLGVDIDNLLCSQP
DTGEQALEICDALARSGAVDVIVVDSVAALTPKAEIEGEIGDSHMGLAARMMSQAMRKLA
GNLKQSNTLLIFINQIRMKIGVMFGNPETTTGGNALKFYASVRLDIRRIGAVKEGDNVVG
SETRVKVVKNKIAAPFKQAEFQILYGEGINFYGELVDLGVKEKLIEKAGAWYSYNGEKIG
QGKANATTWLKENPATAKEIEKRVRELLLSNQNATPDFAVDDS--EGVAETNEDF--
>Salmonella_enterica_subsp._enterica_serovar_Enteritidis_str._SA19970510__complete_genome
MAIDENKQKALAAALGQIEKQFGKGSIMRLGEDRSMDVETISTGSLSLDIALGAGGLPMG
RIVEIYGPESSGKTTLTLQVIAAAQREGKTCAFIDAEHALDPVYARKLGVDIDNLLCSQP
DTGEQALEICDALARSGAVDVIVVDSVAALTPKAEIEGEIGDSHMGLAARMMSQAMRKLA
GNLKQSNTLLIFINQIRMKIGVMFGNPETTTGGNALKFYASVRLDIRRIGAVKEGDNVVG
SETRVKVVKNKIAAPFKQAEFQILYGEGINFYGELVDLGVKEKLIEKAGAWYSYNGEKIG
QGKANATTWLKENPATAKEIEKRVRELLLSNQNATPDFAVDDS--EGVAETNEDF--
>Salmonella_enterica_subsp._enterica_serovar_Enteritidis_str._EC20110221__complete_genome
MAIDENKQKALAAALGQIEKQFGKGSIMRLGEDRSMDVETISTGSLSLDIALGAGGLPMG
RIVEIYGPESSGKTTLTLQVIAAAQREGKTCAFIDAEHALDPVYARKLGVDIDNLLCSQP
DTGEQALEICDALARSGAVDVIVVDSVAALTPKAEIEGEIGDSHMGLAARMMSQAMRKLA
GNLKQSNTLLIFINQIRMKIGVMFGNPETTTGGNALKFYASVRLDIRRIGAVKEGDNVVG
SETRVKVVKNKIAAPFKQAEFQILYGEGINFYGELVDLGVKEKLIEKAGAWYSYNGEKIG
QGKANATTWLKENPATAKEIEKRVRELLLSNQNATPDFAVDDS--EGVAETNEDF--
>Salmonella_enterica_subsp._enterica_serovar_Infantis_strain_FARPER-219_chromosome__complete_genome
MAIDENKQKALAAALGQIEKQFGKGSIMRLGEDRSMDVETISTGSLSLDIALGAGGLPMG
RIVEIYGPESSGKTTLTLQVIAAAQREGKTCAFIDAEHALDPVYARKLGVDIDNLLCSQP
DTGEQALEICDALARSGAVDVIVVDSVAALTPKAEIEGEIGDSHMGLAARMMSQAMRKLA
GNLKQSNTLLIFINQIRMKIGVMFGNPETTTGGNALKFYASVRLDIRRIGAVKEGDNVVG
SETRVKVVKNKIAAPFKQAEFQILYGEGINFYGELVDLGVKEKLIEKAGAWYSYNGEKIG
QGKANATTWLKENPATAKEIEKRVRELLLSNQNATPDFAVDDS--EGVAETNEDF--
>Salmonella_enterica_subsp._enterica_serovar_Enteritidis_strain_OLF-00D989_87-1_chromosome__complete_genome
MAIDENKQKALAAALGQIEKQFGKGSIMRLGEDRSMDVETISTGSLSLDIALGAGGLPMG
RIVEIYGPESSGKTTLTLQVIAAAQREGKTCAFIDAEHALDPVYARKLGVDIDNLLCSQP
DTGEQALEICDALARSGAVDVIVVDSVAALTPKAEIEGEIGDSHMGLAARMMSQAMRKLA
GNLKQSNTLLIFINQIRMKIGVMFGNPETTTGGNALKFYASVRLDIRRIGAVKEGDNVVG
SETRVKVVKNKIAAPFKQAEFQILYGEGINFYGELVDLGVKEKLIEKAGAWYSYNGEKIG
QGKANATTWLKENPATAKEIEKRVRELLLSNQNATPDFAVDDS--EGVAETNEDF--
>Salmonella_enterica_subsp._enterica_serovar_Newport_strain_0211-109__complete_genome
MAIDENKQKALAAALGQIEKQFGKGSIMRLGEDRSMDVETISTGSLSLDIALGAGGLPMG
RIVEIYGPESSGKTTLTLQVIAAAQREGKTCAFIDAEHALDPVYARKLGVDIDNLLCSQP
DTGEQALEICDALARSGAVDVIVVDSVAALTPKAEIEGEIGDSHMGLAARMMSQAMRKLA
GNLKQSNTLLIFINQIRMKIGVMFGNPETTTGGNALKFYASVRLDIRRIGAVKEGDNVVG
SETRVKVVKNKIAAPFKQAEFQILYGEGINFYGELVDLGVKEKLIEKAGAWYSYNGEKIG
QGKANATTWLKENPATAKEIEKRVRELLLSNQNATPDFAVDDS--EGVAETNEDF--
>Salmonella_enterica_strain_LT2_chromosome__complete_genome
MAIDENKQKALAAALGQIEKQFGKGSIMRLGEDRSMDVETISTGSLSLDIALGAGGLPMG
RIVEIYGPESSGKTTLTLQVIAAAQREGKTCAFIDAEHALDPVYARKLGVDIDNLLCSQP
DTGEQALEICDALARSGAVDVIVVDSVAALTPKAEIEGEIGDSHMGLAARMMSQAMRKLA
GNLKQSNTLLIFINQIRMKIGVMFGNPETTTGGNALKFYASVRLDIRRIGAVKEGDNVVG
SETRVKVVKNKIAAPFKQAEFQILYGEGINFYGELVDLGVKEKLIEKAGAWYSYNGEKIG
QGKANATTWLKENPATAKEIEKRVRELLLSNQNATPDFAVDDS--EGVAETNEDF--
>Salmonella_enterica_subsp._enterica_serovar_Bareilly_str._CFSAN000189__complete_genome
MAIDENKQKALAAALGQIEKQFGKGSIMRLGEDRSMDVETISTGSLSLDIALGAGGLPMG
RIVEIYGPESSGKTTLTLQVIAAAQREGKTCAFIDAEHALDPVYARKLGVDIDNLLCSQP
DTGEQALEICDALARSGAVDVIVVDSVAALTPKAEIEGEIGDSHMGLAARMMSQAMRKLA
GNLKQSNTLLIFINQIRMKIGVMFGNPETTTGGNALKFYASVRLDIRRIGAVKEGDNVVG
SETRVKVVKNKIAAPFKQAEFQILYGEGINFYGELVDLGVKEKLIEKAGAWYSYNGEKIG
QGKANATTWLKENPATAKEIEKRVRELLLSNQNATPDFAVDDS--EGVAETNEDF--
>Salmonella_enterica_subsp._enterica_serovar_Antsalova_str._S01-0511_chromosome__complete_genome
MAIDENKQKALAAALGQIEKQFGKGSIMRLGEDRSMDVETISTGSLSLDIALGAGGLPMG
RIVEIYGPESSGKTTLTLQVIAAAQREGKTCAFIDAEHALDPVYARKLGVDIDNLLCSQP
DTGEQALEICDALARSGAVDVIVVDSVAALTPKAEIEGEIGDSHMGLAARMMSQAMRKLA
GNLKQSNTLLIFINQIRMKIGVMFGNPETTTGGNALKFYASVRLDIRRIGAVKEGDNVVG
SETRVKVVKNKIAAPFKQAEFQILYGEGINFYGELVDLGVKEKLIEKAGAWYSYNGEKIG
QGKANATTWLKENPATAKEIEKRVRELLLSNQNATPDFAVDDS--EGVAETNEDF--
>Salmonella_enterica_subsp._enterica_serovar_Saintpaul_strain_CFSAN004175_chromosome__complete_genome
MAIDENKQKALAAALGQIEKQFGKGSIMRLGEDRSMDVETISTGSLSLDIALGAGGLPMG
RIVEIYGPESSGKTTLTLQVIAAAQREGKTCAFIDAEHALDPVYARKLGVDIDNLLCSQP
DTGEQALEICDALARSGAVDVIVVDSVAALTPKAEIEGEIGDSHMGLAARMMSQAMRKLA
GNLKQSNTLLIFINQIRMKIGVMFGNPETTTGGNALKFYASVRLDIRRIGAVKEGDNVVG
SETRVKVVKNKIAAPFKQAEFQILYGEGINFYGELVDLGVKEKLIEKAGAWYSYNGEKIG
QGKANATTWLKENPATAKEIEKRVRELLLSNQNATPDFAVDDS--EGVAETNEDF--
>Salmonella_enterica_subsp._enterica_serovar_Typhimurium_strain_08-365-0802_chromosome__complete_genome
MAIDENKQKALAAALGQIEKQFGKGSIMRLGEDRSMDVETISTGSLSLDIALGAGGLPMG
RIVEIYGPESSGKTTLTLQVIAAAQREGKTCAFIDAEHALDPVYARKLGVDIDNLLCSQP
DTGEQALEICDALARSGAVDVIVVDSVAALTPKAEIEGEIGDSHMGLAARMMSQAMRKLA
GNLKQSNTLLIFINQIRMKIGVMFGNPETTTGGNALKFYASVRLDIRRIGAVKEGDNVVG
SETRVKVVKNKIAAPFKQAEFQILYGEGINFYGELVDLGVKEKLIEKAGAWYSYNGEKIG
QGKANATTWLKENPATAKEIEKRVRELLLSNQNATPDFAVDDS--EGVAETNEDF--
>Salmonella_enterica_subsp._enterica_serovar_Typhi_strain_311189_206186_chromosome__complete_genome
MAIDENKQKALAAALGQIEKQFGKGSIMRLGEDRSMDVETISTGSLSLDIALGAGGLPMG
RIVEIYGPESSGKTTLTLQVIAAAQREGKTCAFIDAEHALDPVYARKLGVDIDNLLCSQP
DTGEQALEICDALARSGAVDVIVVDSVAALTPKAEIEGEIGDSHMGLAARMMSQAMRKLA
GNLKQSNTLLIFINQIRMKIGVMFGNPETTTGGNALKFYASVRLDIRRIGAVKEGDNVVG
SETRVKVVKNKIAAPFKQAEFQILYGEGINFYGELVDLGVKEKLIEKAGAWYSYNGEKIG
QGKANATTWLKENPATAKEIEKRVRELLLSNQNATPDFAVDDS--EGVAETNEDF--
>Salmonella_enterica_subsp._enterica_serovar_Newport_str._USDA-ARS-USMARC-1928_chromosome__complete_genome
MAIDENKQKALAAALGQIEKQFGKGSIMRLGEDRSMDVETISTGSLSLDIALGAGGLPMG
RIVEIYGPESSGKTTLTLQVIAAAQREGKTCAFIDAEHALDPVYARKLGVDIDNLLCSQP
DTGEQALEICDALARSGAVDVIVVDSVAALTPKAEIEGEIGDSHMGLAARMMSQAMRKLA
GNLKQSNTLLIFINQIRMKIGVMFGNPETTTGGNALKFYASVRLDIRRIGAVKEGDNVVG
SETRVKVVKNKIAAPFKQAEFQILYGEGINFYGELVDLGVKEKLIEKAGAWYSYNGEKIG
QGKANATTWLKENPATAKEIEKRVRELLLSNQNATPDFAVDDS--EGVAETNEDF--
>Salmonella_enterica_subsp._enterica_serovar_Senftenberg_strain_11-5006_chromosome__complete_genome
MAIDENKQKALAAALGQIEKQFGKGSIMRLGEDRSMDVETISTGSLSLDIALGAGGLPMG
RIVEIYGPESSGKTTLTLQVIAAAQREGKTCAFIDAEHALDPVYARKLGVDIDNLLCSQP
DTGEQALEICDALARSGAVDVIVVDSVAALTPKAEIEGEIGDSHMGLAARMMSQAMRKLA
GNLKQSNTLLIFINQIRMKIGVMFGNPETTTGGNALKFYASVRLDIRRIGAVKEGDNVVG
SETRVKVVKNKIAAPFKQAEFQILYGEGINFYGELVDLGVKEKLIEKAGAWYSYNGEKIG
QGKANATTWLKENPATAKEIEKRVRELLLSNQNATPDFAVDDS--EGVAETNEDF--
>Salmonella_enterica_subsp._enterica_serovar_Newport_strain_0007-33__complete_genome
MAIDENKQKALAAALGQIEKQFGKGSIMRLGEDRSMDVETISTGSLSLDIALGAGGLPMG
RIVEIYGPESSGKTTLTLQVIAAAQREGKTCAFIDAEHALDPVYARKLGVDIDNLLCSQP
DTGEQALEICDALARSGAVDVIVVDSVAALTPKAEIEGEIGDSHMGLAARMMSQAMRKLA
GNLKQSNTLLIFINQIRMKIGVMFGNPETTTGGNALKFYASVRLDIRRIGAVKEGDNVVG
SETRVKVVKNKIAAPFKQAEFQILYGEGINFYGELVDLGVKEKLIEKAGAWYSYNGEKIG
QGKANATTWLKENPATAKEIEKRVRELLLSNQNATPDFAVDDS--EGVAETNEDF--
>Salmonella_enterica_subsp._enterica_serovar_Heidelberg_strain_SH13-004_chromosome__complete_genome
MAIDENKQKALAAALGQIEKQFGKGSIMRLGEDRSMDVETISTGSLSLDIALGAGGLPMG
RIVEIYGPESSGKTTLTLQVIAAAQREGKTCAFIDAEHALDPVYARKLGVDIDNLLCSQP
DTGEQALEICDALARSGAVDVIVVDSVAALTPKAEIEGEIGDSHMGLAARMMSQAMRKLA
GNLKQSNTLLIFINQIRMKIGVMFGNPETTTGGNALKFYASVRLDIRRIGAVKEGDNVVG
SETRVKVVKNKIAAPFKQAEFQILYGEGINFYGELVDLGVKEKLIEKAGAWYSYNGEKIG
QGKANATTWLKENPATAKEIEKRVRELLLSNQNATPDFAVDDS--EGVAETNEDF--
>Salmonella_enterica_subsp._enterica_serovar_Typhi_strain_311189_202186_chromosome__complete_genome
MAIDENKQKALAAALGQIEKQFGKGSIMRLGEDRSMDVETISTGSLSLDIALGAGGLPMG
RIVEIYGPESSGKTTLTLQVIAAAQREGKTCAFIDAEHALDPVYARKLGVDIDNLLCSQP
DTGEQALEICDALARSGAVDVIVVDSVAALTPKAEIEGEIGDSHMGLAARMMSQAMRKLA
GNLKQSNTLLIFINQIRMKIGVMFGNPETTTGGNALKFYASVRLDIRRIGAVKEGDNVVG
SETRVKVVKNKIAAPFKQAEFQILYGEGINFYGELVDLGVKEKLIEKAGAWYSYNGEKIG
QGKANATTWLKENPATAKEIEKRVRELLLSNQNATPDFAVDDS--EGVAETNEDF--
>Salmonella_enterica_subsp._enterica_serovar_Typhimurium_strain_SAP17-8290_chromosome__complete_genome
MAIDENKQKALAAALGQIEKQFGKGSIMRLGEDRSMDVETISTGSLSLDIALGAGGLPMG
RIVEIYGPESSGKTTLTLQVIAAAQREGKTCAFIDAEHALDPVYARKLGVDIDNLLCSQP
DTGEQALEICDALARSGAVDVIVVDSVAALTPKAEIEGEIGDSHMGLAARMMSQAMRKLA
GNLKQSNTLLIFINQIRMKIGVMFGNPETTTGGNALKFYASVRLDIRRIGAVKEGDNVVG
SETRVKVVKNKIAAPFKQAEFQILYGEGINFYGELVDLGVKEKLIEKAGAWYSYNGEKIG
QGKANATTWLKENPATAKEIEKRVRELLLSNQNATPDFAVDDS--EGVAETNEDF--
>Salmonella_enterica_subsp._enterica_serovar_Typhi_strain_311189_239103_chromosome__complete_genome
MAIDENKQKALAAALGQIEKQFGKGSIMRLGEDRSMDVETISTGSLSLDIALGAGGLPMG
RIVEIYGPESSGKTTLTLQVIAAAQREGKTCAFIDAEHALDPVYARKLGVDIDNLLCSQP
DTGEQALEICDALARSGAVDVIVVDSVAALTPKAEIEGEIGDSHMGLAARMMSQAMRKLA
GNLKQSNTLLIFINQIRMKIGVMFGNPETTTGGNALKFYASVRLDIRRIGAVKEGDNVVG
SETRVKVVKNKIAAPFKQAEFQILYGEGINFYGELVDLGVKEKLIEKAGAWYSYNGEKIG
QGKANATTWLKENPATAKEIEKRVRELLLSNQNATPDFAVDDS--EGVAETNEDF--
>Salmonella_enterica_subsp._enterica_serovar_Stanleyville_strain_RSE30_chromosome__complete_genome
MAIDENKQKALAAALGQIEKQFGKGSIMRLGEDRSMDVETISTGSLSLDIALGAGGLPMG
RIVEIYGPESSGKTTLTLQVIAAAQREGKTCAFIDAEHALDPVYARKLGVDIDNLLCSQP
DTGEQALEICDALARSGAVDVIVVDSVAALTPKAEIEGEIGDSHMGLAARMMSQAMRKLA
GNLKQSNTLLIFINQIRMKIGVMFGNPETTTGGNALKFYASVRLDIRRIGAVKEGDNVVG
SETRVKVVKNKIAAPFKQAEFQILYGEGINFYGELVDLGVKEKLIEKAGAWYSYNGEKIG
QGKANATTWLKENPATAKEIEKRVRELLLSNQNATPDFAVDDS--EGVAETNEDF--
>Salmonella_enterica_subsp._enterica_serovar_Typhimurium_str._CDC_2011K-1702_isolate_USDA-ARS-USMARC-1910_chromosome__complete_genome
MAIDENKQKALAAALGQIEKQFGKGSIMRLGEDRSMDVETISTGSLSLDIALGAGGLPMG
RIVEIYGPESSGKTTLTLQVIAAAQREGKTCAFIDAEHALDPVYARKLGVDIDNLLCSQP
DTGEQALEICDALARSGAVDVIVVDSVAALTPKAEIEGEIGDSHMGLAARMMSQAMRKLA
GNLKQSNTLLIFINQIRMKIGVMFGNPETTTGGNALKFYASVRLDIRRIGAVKEGDNVVG
SETRVKVVKNKIAAPFKQAEFQILYGEGINFYGELVDLGVKEKLIEKAGAWYSYNGEKIG
QGKANATTWLKENPATAKEIEKRVRELLLSNQNATPDFAVDDS--EGVAETNEDF--
>Salmonella_enterica_subsp._enterica_serovar_Typhimurium_str._CDC_H2662_chromosome__complete_genome
MAIDENKQKALAAALGQIEKQFGKGSIMRLGEDRSMDVETISTGSLSLDIALGAGGLPMG
RIVEIYGPESSGKTTLTLQVIAAAQREGKTCAFIDAEHALDPVYARKLGVDIDNLLCSQP
DTGEQALEICDALARSGAVDVIVVDSVAALTPKAEIEGEIGDSHMGLAARMMSQAMRKLA
GNLKQSNTLLIFINQIRMKIGVMFGNPETTTGGNALKFYASVRLDIRRIGAVKEGDNVVG
SETRVKVVKNKIAAPFKQAEFQILYGEGINFYGELVDLGVKEKLIEKAGAWYSYNGEKIG
QGKANATTWLKENPATAKEIEKRVRELLLSNQNATPDFAVDDS--EGVAETNEDF--
>Salmonella_enterica_subsp._enterica_serovar_Typhimurium_strain_RSE04_chromosome__complete_genome
MAIDENKQKALAAALGQIEKQFGKGSIMRLGEDRSMDVETISTGSLSLDIALGAGGLPMG
RIVEIYGPESSGKTTLTLQVIAAAQREGKTCAFIDAEHALDPVYARKLGVDIDNLLCSQP
DTGEQALEICDALARSGAVDVIVVDSVAALTPKAEIEGEIGDSHMGLAARMMSQAMRKLA
GNLKQSNTLLIFINQIRMKIGVMFGNPETTTGGNALKFYASVRLDIRRIGAVKEGDNVVG
SETRVKVVKNKIAAPFKQAEFQILYGEGINFYGELVDLGVKEKLIEKAGAWYSYNGEKIG
QGKANATTWLKENPATAKEIEKRVRELLLSNQNATPDFAVDDS--EGVAETNEDF--
>Salmonella_enterica_subsp._enterica_serovar_Stanleyville_strain_RSE01_chromosome__complete_genome
MAIDENKQKALAAALGQIEKQFGKGSIMRLGEDRSMDVETISTGSLSLDIALGAGGLPMG
RIVEIYGPESSGKTTLTLQVIAAAQREGKTCAFIDAEHALDPVYARKLGVDIDNLLCSQP
DTGEQALEICDALARSGAVDVIVVDSVAALTPKAEIEGEIGDSHMGLAARMMSQAMRKLA
GNLKQSNTLLIFINQIRMKIGVMFGNPETTTGGNALKFYASVRLDIRRIGAVKEGDNVVG
SETRVKVVKNKIAAPFKQAEFQILYGEGINFYGELVDLGVKEKLIEKAGAWYSYNGEKIG
QGKANATTWLKENPATAKEIEKRVRELLLSNQNATPDFAVDDS--EGVAETNEDF--
>Salmonella_enterica_subsp._enterica_serovar_Enteritidis_strain_SAP18-H9654_chromosome__complete_genome
MAIDENKQKALAAALGQIEKQFGKGSIMRLGEDRSMDVETISTGSLSLDIALGAGGLPMG
RIVEIYGPESSGKTTLTLQVIAAAQREGKTCAFIDAEHALDPVYARKLGVDIDNLLCSQP
DTGEQALEICDALARSGAVDVIVVDSVAALTPKAEIEGEIGDSHMGLAARMMSQAMRKLA
GNLKQSNTLLIFINQIRMKIGVMFGNPETTTGGNALKFYASVRLDIRRIGAVKEGDNVVG
SETRVKVVKNKIAAPFKQAEFQILYGEGINFYGELVDLGVKEKLIEKAGAWYSYNGEKIG
QGKANATTWLKENPATAKEIEKRVRELLLSNQNATPDFAVDDS--EGVAETNEDF--
>Salmonella_enterica_subsp._enterica_serovar_Typhimurium_strain_22792_chromosome__complete_genome
MAIDENKQKALAAALGQIEKQFGKGSIMRLGEDRSMDVETISTGSLSLDIALGAGGLPMG
RIVEIYGPESSGKTTLTLQVIAAAQREGKTCAFIDAEHALDPVYARKLGVDIDNLLCSQP
DTGEQALEICDALARSGAVDVIVVDSVAALTPKAEIEGEIGDSHMGLAARMMSQAMRKLA
GNLKQSNTLLIFINQIRMKIGVMFGNPETTTGGNALKFYASVRLDIRRIGAVKEGDNVVG
SETRVKVVKNKIAAPFKQAEFQILYGEGINFYGELVDLGVKEKLIEKAGAWYSYNGEKIG
QGKANATTWLKENPATAKEIEKRVRELLLSNQNATPDFAVDDS--EGVAETNEDF--
>Salmonella_enterica_subsp._enterica_serovar_Typhi_strain_311189_204186_chromosome__complete_genome
MAIDENKQKALAAALGQIEKQFGKGSIMRLGEDRSMDVETISTGSLSLDIALGAGGLPMG
RIVEIYGPESSGKTTLTLQVIAAAQREGKTCAFIDAEHALDPVYARKLGVDIDNLLCSQP
DTGEQALEICDALARSGAVDVIVVDSVAALTPKAEIEGEIGDSHMGLAARMMSQAMRKLA
GNLKQSNTLLIFINQIRMKIGVMFGNPETTTGGNALKFYASVRLDIRRIGAVKEGDNVVG
SETRVKVVKNKIAAPFKQAEFQILYGEGINFYGELVDLGVKEKLIEKAGAWYSYNGEKIG
QGKANATTWLKENPATAKEIEKRVRELLLSNQNATPDFAVDDS--EGVAETNEDF--
>Salmonella_enterica_subsp._enterica_serovar_Schwarzengrund_strain_12888_chromosome__complete_genome
MAIDENKQKALAAALGQIEKQFGKGSIMRLGEDRSMDVETISTGSLSLDIALGAGGLPMG
RIVEIYGPESSGKTTLTLQVIAAAQREGKTCAFIDAEHALDPVYARKLGVDIDNLLCSQP
DTGEQALEICDALARSGAVDVIVVDSVAALTPKAEIEGEIGDSHMGLAARMMSQAMRKLA
GNLKQSNTLLIFINQIRMKIGVMFGNPETTTGGNALKFYASVRLDIRRIGAVKEGDNVVG
SETRVKVVKNKIAAPFKQAEFQILYGEGINFYGELVDLGVKEKLIEKAGAWYSYNGEKIG
QGKANATTWLKENPATAKEIEKRVRELLLSNQNATPDFAVDDS--EGVAETNEDF--
>Salmonella_sp._SSDFZ54_chromosome__complete_genome
MAIDENKQKALAAALGQIEKQFGKGSIMRLGEDRSMDVETISTGSLSLDIALGAGGLPMG
RIVEIYGPESSGKTTLTLQVIAAAQREGKTCAFIDAEHALDPVYARKLGVDIDNLLCSQP
DTGEQALEICDALARSGAVDVIVVDSVAALTPKAEIEGEIGDSHMGLAARMMSQAMRKLA
GNLKQSNTLLIFINQIRMKIGVMFGNPETTTGGNALKFYASVRLDIRRIGAVKEGDNVVG
SETRVKVVKNKIAAPFKQAEFQILYGEGINFYGELVDLGVKEKLIEKAGAWYSYNGEKIG
QGKANATTWLKENPATAKEIEKRVRELLLSNQNATPDFAVDDS--EGVAETNEDF--
>Salmonella_enterica_subsp._enterica_serovar_Enteritidis_strain_SAP18-0432_chromosome__complete_genome
MAIDENKQKALAAALGQIEKQFGKGSIMRLGEDRSMDVETISTGSLSLDIALGAGGLPMG
RIVEIYGPESSGKTTLTLQVIAAAQREGKTCAFIDAEHALDPVYARKLGVDIDNLLCSQP
DTGEQALEICDALARSGAVDVIVVDSVAALTPKAEIEGEIGDSHMGLAARMMSQAMRKLA
GNLKQSNTLLIFINQIRMKIGVMFGNPETTTGGNALKFYASVRLDIRRIGAVKEGDNVVG
SETRVKVVKNKIAAPFKQAEFQILYGEGINFYGELVDLGVKEKLIEKAGAWYSYNGEKIG
QGKANATTWLKENPATAKEIEKRVRELLLSNQNATPDFAVDDS--EGVAETNEDF--
>Salmonella_enterica_subsp._enterica_serovar_Typhimurium_str._CDC_2010K-1587_isolate_USDA-ARS-USMARC-1908_chromosome__complete_genome
MAIDENKQKALAAALGQIEKQFGKGSIMRLGEDRSMDVETISTGSLSLDIALGAGGLPMG
RIVEIYGPESSGKTTLTLQVIAAAQREGKTCAFIDAEHALDPVYARKLGVDIDNLLCSQP
DTGEQALEICDALARSGAVDVIVVDSVAALTPKAEIEGEIGDSHMGLAARMMSQAMRKLA
GNLKQSNTLLIFINQIRMKIGVMFGNPETTTGGNALKFYASVRLDIRRIGAVKEGDNVVG
SETRVKVVKNKIAAPFKQAEFQILYGEGINFYGELVDLGVKEKLIEKAGAWYSYNGEKIG
QGKANATTWLKENPATAKEIEKRVRELLLSNQNATPDFAVDDS--EGVAETNEDF--
>Salmonella_enterica_subsp._enterica_serovar_Typhi_strain_311189_210186_chromosome__complete_genome
MAIDENKQKALAAALGQIEKQFGKGSIMRLGEDRSMDVETISTGSLSLDIALGAGGLPMG
RIVEIYGPESSGKTTLTLQVIAAAQREGKTCAFIDAEHALDPVYARKLGVDIDNLLCSQP
DTGEQALEICDALARSGAVDVIVVDSVAALTPKAEIEGEIGDSHMGLAARMMSQAMRKLA
GNLKQSNTLLIFINQIRMKIGVMFGNPETTTGGNALKFYASVRLDIRRIGAVKEGDNVVG
SETRVKVVKNKIAAPFKQAEFQILYGEGINFYGELVDLGVKEKLIEKAGAWYSYNGEKIG
QGKANATTWLKENPATAKEIEKRVRELLLSNQNATPDFAVDDS--EGVAETNEDF--
>Salmonella_enterica_subsp._enterica_serovar_Rough_O_-_-_strain_11-0883_chromosome__complete_genome
MAIDENKQKALAAALGQIEKQFGKGSIMRLGEDRSMDVETISTGSLSLDIALGAGGLPMG
RIVEIYGPESSGKTTLTLQVIAAAQREGKTCAFIDAEHALDPVYARKLGVDIDNLLCSQP
DTGEQALEICDALARSGAVDVIVVDSVAALTPKAEIEGEIGDSHMGLAARMMSQAMRKLA
GNLKQSNTLLIFINQIRMKIGVMFGNPETTTGGNALKFYASVRLDIRRIGAVKEGDNVVG
SETRVKVVKNKIAAPFKQAEFQILYGEGINFYGELVDLGVKEKLIEKAGAWYSYNGEKIG
QGKANATTWLKENPATAKEIEKRVRELLLSNQNATPDFAVDDS--EGVAETNEDF--
>Salmonella_enterica_subsp._enterica_serovar_Bareilly_str._CFSAN000212_chromosome__complete_genome
MAIDENKQKALAAALGQIEKQFGKGSIMRLGEDRSMDVETISTGSLSLDIALGAGGLPMG
RIVEIYGPESSGKTTLTLQVIAAAQREGKTCAFIDAEHALDPVYARKLGVDIDNLLCSQP
DTGEQALEICDALARSGAVDVIVVDSVAALTPKAEIEGEIGDSHMGLAARMMSQAMRKLA
GNLKQSNTLLIFINQIRMKIGVMFGNPETTTGGNALKFYASVRLDIRRIGAVKEGDNVVG
SETRVKVVKNKIAAPFKQAEFQILYGEGINFYGELVDLGVKEKLIEKAGAWYSYNGEKIG
QGKANATTWLKENPATAKEIEKRVRELLLSNQNATPDFAVDDS--EGVAETNEDF--
>Salmonella_enterica_subsp._enterica_serovar_Enteritidis_str._SA20095440__complete_genome
MAIDENKQKALAAALGQIEKQFGKGSIMRLGEDRSMDVETISTGSLSLDIALGAGGLPMG
RIVEIYGPESSGKTTLTLQVIAAAQREGKTCAFIDAEHALDPVYARKLGVDIDNLLCSQP
DTGEQALEICDALARSGAVDVIVVDSVAALTPKAEIEGEIGDSHMGLAARMMSQAMRKLA
GNLKQSNTLLIFINQIRMKIGVMFGNPETTTGGNALKFYASVRLDIRRIGAVKEGDNVVG
SETRVKVVKNKIAAPFKQAEFQILYGEGINFYGELVDLGVKEKLIEKAGAWYSYNGEKIG
QGKANATTWLKENPATAKEIEKRVRELLLSNQNATPDFAVDDS--EGVAETNEDF--
>Salmonella_enterica_subsp._enterica_serovar_Enteritidis_strain_PT1_chromosome__complete_genome
MAIDENKQKALAAALGQIEKQFGKGSIMRLGEDRSMDVETISTGSLSLDIALGAGGLPMG
RIVEIYGPESSGKTTLTLQVIAAAQREGKTCAFIDAEHALDPVYARKLGVDIDNLLCSQP
DTGEQALEICDALARSGAVDVIVVDSVAALTPKAEIEGEIGDSHMGLAARMMSQAMRKLA
GNLKQSNTLLIFINQIRMKIGVMFGNPETTTGGNALKFYASVRLDIRRIGAVKEGDNVVG
SETRVKVVKNKIAAPFKQAEFQILYGEGINFYGELVDLGVKEKLIEKAGAWYSYNGEKIG
QGKANATTWLKENPATAKEIEKRVRELLLSNQNATPDFAVDDS--EGVAETNEDF--
>Salmonella_enterica_subsp._enterica_serovar_Concord_strain_CFSAN018747_chromosome__complete_genome
MAIDENKQKALAAALGQIEKQFGKGSIMRLGEDRSMDVETISTGSLSLDIALGAGGLPMG
RIVEIYGPESSGKTTLTLQVIAAAQREGKTCAFIDAEHALDPVYARKLGVDIDNLLCSQP
DTGEQALEICDALARSGAVDVIVVDSVAALTPKAEIEGEIGDSHMGLAARMMSQAMRKLA
GNLKQSNTLLIFINQIRMKIGVMFGNPETTTGGNALKFYASVRLDIRRIGAVKEGDNVVG
SETRVKVVKNKIAAPFKQAEFQILYGEGINFYGELVDLGVKEKLIEKAGAWYSYNGEKIG
QGKANATTWLKENPATAKEIEKRVRELLLSNQNATPDFAVDDS--EGVAETNEDF--
>Salmonella_enterica_subsp._enterica_serovar_Thompson_strain_SH11G0791_chromosome__complete_genome
MAIDENKQKALAAALGQIEKQFGKGSIMRLGEDRSMDVETISTGSLSLDIALGAGGLPMG
RIVEIYGPESSGKTTLTLQVIAAAQREGKTCAFIDAEHALDPVYARKLGVDIDNLLCSQP
DTGEQALEICDALARSGAVDVIVVDSVAALTPKAEIEGEIGDSHMGLAARMMSQAMRKLA
GNLKQSNTLLIFINQIRMKIGVMFGNPETTTGGNALKFYASVRLDIRRIGAVKEGDNVVG
SETRVKVVKNKIAAPFKQAEFQILYGEGINFYGELVDLGVKEKLIEKAGAWYSYNGEKIG
QGKANATTWLKENPATAKEIEKRVRELLLSNQNATPDFAVDDS--EGVAETNEDF--
>Salmonella_enterica_subsp._enterica_serovar_Koessen_str._S-1501_chromosome__complete_genome
MAIDENKQKALAAALGQIEKQFGKGSIMRLGEDRSMDVETISTGSLSLDIALGAGGLPMG
RIVEIYGPESSGKTTLTLQVIAAAQREGKTCAFIDAEHALDPVYARKLGVDIDNLLCSQP
DTGEQALEICDALARSGAVDVIVVDSVAALTPKAEIEGEIGDSHMGLAARMMSQAMRKLA
GNLKQSNTLLIFINQIRMKIGVMFGNPETTTGGNALKFYASVRLDIRRIGAVKEGDNVVG
SETRVKVVKNKIAAPFKQAEFQILYGEGINFYGELVDLGVKEKLIEKAGAWYSYNGEKIG
QGKANATTWLKENPATAKEIEKRVRELLLSNQNATPDFAVDDS--EGVAETNEDF--
>Salmonella_enterica_subsp._enterica_serovar_Enteritidis_str._SA19981857__complete_genome
MAIDENKQKALAAALGQIEKQFGKGSIMRLGEDRSMDVETISTGSLSLDIALGAGGLPMG
RIVEIYGPESSGKTTLTLQVIAAAQREGKTCAFIDAEHALDPVYARKLGVDIDNLLCSQP
DTGEQALEICDALARSGAVDVIVVDSVAALTPKAEIEGEIGDSHMGLAARMMSQAMRKLA
GNLKQSNTLLIFINQIRMKIGVMFGNPETTTGGNALKFYASVRLDIRRIGAVKEGDNVVG
SETRVKVVKNKIAAPFKQAEFQILYGEGINFYGELVDLGVKEKLIEKAGAWYSYNGEKIG
QGKANATTWLKENPATAKEIEKRVRELLLSNQNATPDFAVDDS--EGVAETNEDF--
>Salmonella_enterica_subsp._enterica_serovar_Manchester_str._ST278_chromosome__complete_genome
MAIDENKQKALAAALGQIEKQFGKGSIMRLGEDRSMDVETISTGSLSLDIALGAGGLPMG
RIVEIYGPESSGKTTLTLQVIAAAQREGKTCAFIDAEHALDPVYARKLGVDIDNLLCSQP
DTGEQALEICDALARSGAVDVIVVDSVAALTPKAEIEGEIGDSHMGLAARMMSQAMRKLA
GNLKQSNTLLIFINQIRMKIGVMFGNPETTTGGNALKFYASVRLDIRRIGAVKEGDNVVG
SETRVKVVKNKIAAPFKQAEFQILYGEGINFYGELVDLGVKEKLIEKAGAWYSYNGEKIG
QGKANATTWLKENPATAKEIEKRVRELLLSNQNATPDFAVDDS--EGVAETNEDF--
>Salmonella_enterica_subsp._enterica_serovar_Typhimurium_str._CDC_2009K-1640_isolate_USDA-ARS-USMARC-1906_chromosome__complete_genome
MAIDENKQKALAAALGQIEKQFGKGSIMRLGEDRSMDVETISTGSLSLDIALGAGGLPMG
RIVEIYGPESSGKTTLTLQVIAAAQREGKTCAFIDAEHALDPVYARKLGVDIDNLLCSQP
DTGEQALEICDALARSGAVDVIVVDSVAALTPKAEIEGEIGDSHMGLAARMMSQAMRKLA
GNLKQSNTLLIFINQIRMKIGVMFGNPETTTGGNALKFYASVRLDIRRIGAVKEGDNVVG
SETRVKVVKNKIAAPFKQAEFQILYGEGINFYGELVDLGVKEKLIEKAGAWYSYNGEKIG
QGKANATTWLKENPATAKEIEKRVRELLLSNQNATPDFAVDDS--EGVAETNEDF--
>Salmonella_enterica_subsp._enterica_serovar_Anatum_str._USDA-ARS-USMARC-1728__complete_genome
MAIDENKQKALAAALGQIEKQFGKGSIMRLGEDRSMDVETISTGSLSLDIALGAGGLPMG
RIVEIYGPESSGKTTLTLQVIAAAQREGKTCAFIDAEHALDPVYARKLGVDIDNLLCSQP
DTGEQALEICDALARSGAVDVIVVDSVAALTPKAEIEGEIGDSHMGLAARMMSQAMRKLA
GNLKQSNTLLIFINQIRMKIGVMFGNPETTTGGNALKFYASVRLDIRRIGAVKEGDNVVG
SETRVKVVKNKIAAPFKQAEFQILYGEGINFYGELVDLGVKEKLIEKAGAWYSYNGEKIG
QGKANATTWLKENPATAKEIEKRVRELLLSNQNATPDFAVDDS--EGVAETNEDF--
>Salmonella_enterica_subsp._enterica_serovar_Typhi_strain_343078_223175_chromosome__complete_genome
MAIDENKQKALAAALGQIEKQFGKGSIMRLGEDRSMDVETISTGSLSLDIALGAGGLPMG
RIVEIYGPESSGKTTLTLQVIAAAQREGKTCAFIDAEHALDPVYARKLGVDIDNLLCSQP
DTGEQALEICDALARSGAVDVIVVDSVAALTPKAEIEGEIGDSHMGLAARMMSQAMRKLA
GNLKQSNTLLIFINQIRMKIGVMFGNPETTTGGNALKFYASVRLDIRRIGAVKEGDNVVG
SETRVKVVKNKIAAPFKQAEFQILYGEGINFYGELVDLGVKEKLIEKAGAWYSYNGEKIG
QGKANATTWLKENPATAKEIEKRVRELLLSNQNATPDFAVDDS--EGVAETNEDF--
>Salmonella_enterica_subsp._enterica_strain_AR-0407_chromosome__complete_genome
MAIDENKQKALAAALGQIEKQFGKGSIMRLGEDRSMDVETISTGSLSLDIALGAGGLPMG
RIVEIYGPESSGKTTLTLQVIAAAQREGKTCAFIDAEHALDPVYARKLGVDIDNLLCSQP
DTGEQALEICDALARSGAVDVIVVDSVAALTPKAEIEGEIGDSHMGLAARMMSQAMRKLA
GNLKQSNTLLIFINQIRMKIGVMFGNPETTTGGNALKFYASVRLDIRRIGAVKEGDNVVG
SETRVKVVKNKIAAPFKQAEFQILYGEGINFYGELVDLGVKEKLIEKAGAWYSYNGEKIG
QGKANATTWLKENPATAKEIEKRVRELLLSNQNATPDFAVDDS--EGVAETNEDF--
>Salmonella_enterica_subsp._enterica_strain_ID109699_chromosome__complete_genome
MAIDENKQKALAAALGQIEKQFGKGSIMRLGEDRSMDVETISTGSLSLDIALGAGGLPMG
RIVEIYGPESSGKTTLTLQVIAAAQREGKTCAFIDAEHALDPVYARKLGVDIDNLLCSQP
DTGEQALEICDALARSGAVDVIVVDSVAALTPKAEIEGEIGDSHMGLAARMMSQAMRKLA
GNLKQSNTLLIFINQIRMKIGVMFGNPETTTGGNALKFYASVRLDIRRIGAVKEGDNVVG
SETRVKVVKNKIAAPFKQAEFQILYGEGINFYGELVDLGVKEKLIEKAGAWYSYNGEKIG
QGKANATTWLKENPATAKEIEKRVRELLLSNQNATPDFAVDDS--EGVAETNEDF--
>Salmonella_enterica_subsp._enterica_serovar_Anatum_str._USDA-ARS-USMARC-1781__complete_genome
MAIDENKQKALAAALGQIEKQFGKGSIMRLGEDRSMDVETISTGSLSLDIALGAGGLPMG
RIVEIYGPESSGKTTLTLQVIAAAQREGKTCAFIDAEHALDPVYARKLGVDIDNLLCSQP
DTGEQALEICDALARSGAVDVIVVDSVAALTPKAEIEGEIGDSHMGLAARMMSQAMRKLA
GNLKQSNTLLIFINQIRMKIGVMFGNPETTTGGNALKFYASVRLDIRRIGAVKEGDNVVG
SETRVKVVKNKIAAPFKQAEFQILYGEGINFYGELVDLGVKEKLIEKAGAWYSYNGEKIG
QGKANATTWLKENPATAKEIEKRVRELLLSNQNATPDFAVDDS--EGVAETNEDF--
>Salmonella_enterica_subsp._enterica_serovar_Enteritidis_str._SA20082034__complete_genome
MAIDENKQKALAAALGQIEKQFGKGSIMRLGEDRSMDVETISTGSLSLDIALGAGGLPMG
RIVEIYGPESSGKTTLTLQVIAAAQREGKTCAFIDAEHALDPVYARKLGVDIDNLLCSQP
DTGEQALEICDALARSGAVDVIVVDSVAALTPKAEIEGEIGDSHMGLAARMMSQAMRKLA
GNLKQSNTLLIFINQIRMKIGVMFGNPETTTGGNALKFYASVRLDIRRIGAVKEGDNVVG
SETRVKVVKNKIAAPFKQAEFQILYGEGINFYGELVDLGVKEKLIEKAGAWYSYNGEKIG
QGKANATTWLKENPATAKEIEKRVRELLLSNQNATPDFAVDDS--EGVAETNEDF--
>Salmonella_enterica_subsp._enterica_serovar_Enteritidis_strain_OLF-SE4-0317-8__complete_genome
MAIDENKQKALAAALGQIEKQFGKGSIMRLGEDRSMDVETISTGSLSLDIALGAGGLPMG
RIVEIYGPESSGKTTLTLQVIAAAQREGKTCAFIDAEHALDPVYARKLGVDIDNLLCSQP
DTGEQALEICDALARSGAVDVIVVDSVAALTPKAEIEGEIGDSHMGLAARMMSQAMRKLA
GNLKQSNTLLIFINQIRMKIGVMFGNPETTTGGNALKFYASVRLDIRRIGAVKEGDNVVG
SETRVKVVKNKIAAPFKQAEFQILYGEGINFYGELVDLGVKEKLIEKAGAWYSYNGEKIG
QGKANATTWLKENPATAKEIEKRVRELLLSNQNATPDFAVDDS--EGVAETNEDF--
>Salmonella_enterica_subsp._enterica_serovar_Heidelberg_str._B182__complete_genome
MAIDENKQKALAAALGQIEKQFGKGSIMRLGEDRSMDVETISTGSLSLDIALGAGGLPMG
RIVEIYGPESSGKTTLTLQVIAAAQREGKTCAFIDAEHALDPVYARKLGVDIDNLLCSQP
DTGEQALEICDALARSGAVDVIVVDSVAALTPKAEIEGEIGDSHMGLAARMMSQAMRKLA
GNLKQSNTLLIFINQIRMKIGVMFGNPETTTGGNALKFYASVRLDIRRIGAVKEGDNVVG
SETRVKVVKNKIAAPFKQAEFQILYGEGINFYGELVDLGVKEKLIEKAGAWYSYNGEKIG
QGKANATTWLKENPATAKEIEKRVRELLLSNQNATPDFAVDDS--EGVAETNEDF--
>Salmonella_enterica_subsp._enterica_serovar_Nitra_strain_S-1687_chromosome__complete_genome
MAIDENKQKALAAALGQIEKQFGKGSIMRLGEDRSMDVETISTGSLSLDIALGAGGLPMG
RIVEIYGPESSGKTTLTLQVIAAAQREGKTCAFIDAEHALDPVYARKLGVDIDNLLCSQP
DTGEQALEICDALARSGAVDVIVVDSVAALTPKAEIEGEIGDSHMGLAARMMSQAMRKLA
GNLKQSNTLLIFINQIRMKIGVMFGNPETTTGGNALKFYASVRLDIRRIGAVKEGDNVVG
SETRVKVVKNKIAAPFKQAEFQILYGEGINFYGELVDLGVKEKLIEKAGAWYSYNGEKIG
QGKANATTWLKENPATAKEIEKRVRELLLSNQNATPDFAVDDS--EGVAETNEDF--
>Salmonella_enterica_subsp._enterica_serovar_Typhimurium_var._5-_str._CFSAN001921__complete_genome
MAIDENKQKALAAALGQIEKQFGKGSIMRLGEDRSMDVETISTGSLSLDIALGAGGLPMG
RIVEIYGPESSGKTTLTLQVIAAAQREGKTCAFIDAEHALDPVYARKLGVDIDNLLCSQP
DTGEQALEICDALARSGAVDVIVVDSVAALTPKAEIEGEIGDSHMGLAARMMSQAMRKLA
GNLKQSNTLLIFINQIRMKIGVMFGNPETTTGGNALKFYASVRLDIRRIGAVKEGDNVVG
SETRVKVVKNKIAAPFKQAEFQILYGEGINFYGELVDLGVKEKLIEKAGAWYSYNGEKIG
QGKANATTWLKENPATAKEIEKRVRELLLSNQNATPDFAVDDS--EGVAETNEDF--
>Salmonella_sp._SSDFZ69_chromosome__complete_genome
MAIDENKQKALAAALGQIEKQFGKGSIMRLGEDRSMDVETISTGSLSLDIALGAGGLPMG
RIVEIYGPESSGKTTLTLQVIAAAQREGKTCAFIDAEHALDPVYARKLGVDIDNLLCSQP
DTGEQALEICDALARSGAVDVIVVDSVAALTPKAEIEGEIGDSHMGLAARMMSQAMRKLA
GNLKQSNTLLIFINQIRMKIGVMFGNPETTTGGNALKFYASVRLDIRRIGAVKEGDNVVG
SETRVKVVKNKIAAPFKQAEFQILYGEGINFYGELVDLGVKEKLIEKAGAWYSYNGEKIG
QGKANATTWLKENPATAKEIEKRVRELLLSNQNATPDFAVDDS--EGVAETNEDF--
>Salmonella_enterica_subsp._enterica_serovar_Typhimurium_strain_SAP17-7399_chromosome__complete_genome
MAIDENKQKALAAALGQIEKQFGKGSIMRLGEDRSMDVETISTGSLSLDIALGAGGLPMG
RIVEIYGPESSGKTTLTLQVIAAAQREGKTCAFIDAEHALDPVYARKLGVDIDNLLCSQP
DTGEQALEICDALARSGAVDVIVVDSVAALTPKAEIEGEIGDSHMGLAARMMSQAMRKLA
GNLKQSNTLLIFINQIRMKIGVMFGNPETTTGGNALKFYASVRLDIRRIGAVKEGDNVVG
SETRVKVVKNKIAAPFKQAEFQILYGEGINFYGELVDLGVKEKLIEKAGAWYSYNGEKIG
QGKANATTWLKENPATAKEIEKRVRELLLSNQNATPDFAVDDS--EGVAETNEDF--
>Salmonella_enterica_subsp._enterica_serovar_Enteritidis_strain_OLF-SE2-98984-6__complete_genome
MAIDENKQKALAAALGQIEKQFGKGSIMRLGEDRSMDVETISTGSLSLDIALGAGGLPMG
RIVEIYGPESSGKTTLTLQVIAAAQREGKTCAFIDAEHALDPVYARKLGVDIDNLLCSQP
DTGEQALEICDALARSGAVDVIVVDSVAALTPKAEIEGEIGDSHMGLAARMMSQAMRKLA
GNLKQSNTLLIFINQIRMKIGVMFGNPETTTGGNALKFYASVRLDIRRIGAVKEGDNVVG
SETRVKVVKNKIAAPFKQAEFQILYGEGINFYGELVDLGVKEKLIEKAGAWYSYNGEKIG
QGKANATTWLKENPATAKEIEKRVRELLLSNQNATPDFAVDDS--EGVAETNEDF--
>Salmonella_enterica_subsp._enterica_serovar_Pullorum_str._ATCC_9120__complete_genome
MAIDENKQKALAAALGQIEKQFGKGSIMRLGEDRSMDVETISTGSLSLDIALGAGGLPMG
RIVEIYGPESSGKTTLTLQVIAAAQREGKTCAFIDAEHALDPVYARKLGVDIDNLLCSQP
DTGEQALEICDALARSGAVDVIVVDSVAALTPKAEIEGEIGDSHMGLAARMMSQAMRKLA
GNLKQSNTLLIFINQIRMKIGVMFGNPETTTGGNALKFYASVRLDIRRIGAVKEGDNVVG
SETRVKVVKNKIAAPFKQAEFQILYGEGINFYGELVDLGVKEKLIEKAGAWYSYNGEKIG
QGKANATTWLKENPATAKEIEKRVRELLLSNQNATPDFAVDDS--EGVAETNEDF--
>Salmonella_enterica_subsp._enterica_serovar_Typhi_strain_311189_216103_chromosome__complete_genome
MAIDENKQKALAAALGQIEKQFGKGSIMRLGEDRSMDVETISTGSLSLDIALGAGGLPMG
RIVEIYGPESSGKTTLTLQVIAAAQREGKTCAFIDAEHALDPVYARKLGVDIDNLLCSQP
DTGEQALEICDALARSGAVDVIVVDSVAALTPKAEIEGEIGDSHMGLAARMMSQAMRKLA
GNLKQSNTLLIFINQIRMKIGVMFGNPETTTGGNALKFYASVRLDIRRIGAVKEGDNVVG
SETRVKVVKNKIAAPFKQAEFQILYGEGINFYGELVDLGVKEKLIEKAGAWYSYNGEKIG
QGKANATTWLKENPATAKEIEKRVRELLLSNQNATPDFAVDDS--EGVAETNEDF--
>Salmonella_enterica_subsp._enterica_strain_10C0710427_chromosome__complete_genome
MAIDENKQKALAAALGQIEKQFGKGSIMRLGEDRSMDVETISTGSLSLDIALGAGGLPMG
RIVEIYGPESSGKTTLTLQVIAAAQREGKTCAFIDAEHALDPVYARKLGVDIDNLLCSQP
DTGEQALEICDALARSGAVDVIVVDSVAALTPKAEIEGEIGDSHMGLAARMMSQAMRKLA
GNLKQSNTLLIFINQIRMKIGVMFGNPETTTGGNALKFYASVRLDIRRIGAVKEGDNVVG
SETRVKVVKNKIAAPFKQAEFQILYGEGINFYGELVDLGVKEKLIEKAGAWYSYNGEKIG
QGKANATTWLKENPATAKEIEKRVRELLLSNQNATPDFAVDDS--EGVAETNEDF--
>Salmonella_enterica_subsp._enterica_serovar_Anatum_strain_GT-01__complete_genome
MAIDENKQKALAAALGQIEKQFGKGSIMRLGEDRSMDVETISTGSLSLDIALGAGGLPMG
RIVEIYGPESSGKTTLTLQVIAAAQREGKTCAFIDAEHALDPVYARKLGVDIDNLLCSQP
DTGEQALEICDALARSGAVDVIVVDSVAALTPKAEIEGEIGDSHMGLAARMMSQAMRKLA
GNLKQSNTLLIFINQIRMKIGVMFGNPETTTGGNALKFYASVRLDIRRIGAVKEGDNVVG
SETRVKVVKNKIAAPFKQAEFQILYGEGINFYGELVDLGVKEKLIEKAGAWYSYNGEKIG
QGKANATTWLKENPATAKEIEKRVRELLLSNQNATPDFAVDDS--EGVAETNEDF--
>Salmonella_enterica_subsp._enterica_serovar_Yovokome_str._S-1850_chromosome__complete_genome
MAIDENKQKALAAALGQIEKQFGKGSIMRLGEDRSMDVETISTGSLSLDIALGAGGLPMG
RIVEIYGPESSGKTTLTLQVIAAAQREGKTCAFIDAEHALDPVYARKLGVDIDNLLCSQP
DTGEQALEICDALARSGAVDVIVVDSVAALTPKAEIEGEIGDSHMGLAARMMSQAMRKLA
GNLKQSNTLLIFINQIRMKIGVMFGNPETTTGGNALKFYASVRLDIRRIGAVKEGDNVVG
SETRVKVVKNKIAAPFKQAEFQILYGEGINFYGELVDLGVKEKLIEKAGAWYSYNGEKIG
QGKANATTWLKENPATAKEIEKRVRELLLSNQNATPDFAVDDS--EGVAETNEDF--
>Salmonella_enterica_subsp._enterica_serovar_Enteritidis_str._EC20090698__complete_genome
MAIDENKQKALAAALGQIEKQFGKGSIMRLGEDRSMDVETISTGSLSLDIALGAGGLPMG
RIVEIYGPESSGKTTLTLQVIAAAQREGKTCAFIDAEHALDPVYARKLGVDIDNLLCSQP
DTGEQALEICDALARSGAVDVIVVDSVAALTPKAEIEGEIGDSHMGLAARMMSQAMRKLA
GNLKQSNTLLIFINQIRMKIGVMFGNPETTTGGNALKFYASVRLDIRRIGAVKEGDNVVG
SETRVKVVKNKIAAPFKQAEFQILYGEGINFYGELVDLGVKEKLIEKAGAWYSYNGEKIG
QGKANATTWLKENPATAKEIEKRVRELLLSNQNATPDFAVDDS--EGVAETNEDF--
>Salmonella_enterica_subsp._enterica_serovar_Newport_str._CDC_2012K-0663_chromosome__complete_genome
MAIDENKQKALAAALGQIEKQFGKGSIMRLGEDRSMDVETISTGSLSLDIALGAGGLPMG
RIVEIYGPESSGKTTLTLQVIAAAQREGKTCAFIDAEHALDPVYARKLGVDIDNLLCSQP
DTGEQALEICDALARSGAVDVIVVDSVAALTPKAEIEGEIGDSHMGLAARMMSQAMRKLA
GNLKQSNTLLIFINQIRMKIGVMFGNPETTTGGNALKFYASVRLDIRRIGAVKEGDNVVG
SETRVKVVKNKIAAPFKQAEFQILYGEGINFYGELVDLGVKEKLIEKAGAWYSYNGEKIG
QGKANATTWLKENPATAKEIEKRVRELLLSNQNATPDFAVDDS--EGVAETNEDF--
>Salmonella_enterica_subsp._enterica_serovar_Gallinarum
MAIDENKQKALAAALGQIEKQFGKGSIMRLGEDRSMDVETISTGSLSLDIALGAGGLPMG
RIVEIYGPESSGKTTLTLQVIAAAQREGKTCAFIDAEHALDPVYARKLGVDIDNLLCSQP
DTGEQALEICDALARSGAVDVIVVDSVAALTPKAEIEGEIGDSHMGLAARMMSQAMRKLA
GNLKQSNTLLIFINQIRMKIGVMFGNPETTTGGNALKFYASVRLDIRRIGAVKEGDNVVG
SETRVKVVKNKIAAPFKQAEFQILYGEGINFYGELVDLGVKEKLIEKAGAWYSYNGEKIG
QGKANATTWLKENPATAKEIEKRVRELLLSNQNATPDFAVDDS--EGVAETNEDF--
>Salmonella_enterica_subsp._enterica_serovar_Typhi_strain_343078_251131_chromosome__complete_genome
MAIDENKQKALAAALGQIEKQFGKGSIMRLGEDRSMDVETISTGSLSLDIALGAGGLPMG
RIVEIYGPESSGKTTLTLQVIAAAQREGKTCAFIDAEHALDPVYARKLGVDIDNLLCSQP
DTGEQALEICDALARSGAVDVIVVDSVAALTPKAEIEGEIGDSHMGLAARMMSQAMRKLA
GNLKQSNTLLIFINQIRMKIGVMFGNPETTTGGNALKFYASVRLDIRRIGAVKEGDNVVG
SETRVKVVKNKIAAPFKQAEFQILYGEGINFYGELVDLGVKEKLIEKAGAWYSYNGEKIG
QGKANATTWLKENPATAKEIEKRVRELLLSNQNATPDFAVDDS--EGVAETNEDF--
>Salmonella_enterica_subsp._enterica_serovar_Sloterdijk_str._ATCC_15791__complete_genome
MAIDENKQKALAAALGQIEKQFGKGSIMRLGEDRSMDVETISTGSLSLDIALGAGGLPMG
RIVEIYGPESSGKTTLTLQVIAAAQREGKTCAFIDAEHALDPVYARKLGVDIDNLLCSQP
DTGEQALEICDALARSGAVDVIVVDSVAALTPKAEIEGEIGDSHMGLAARMMSQAMRKLA
GNLKQSNTLLIFINQIRMKIGVMFGNPETTTGGNALKFYASVRLDIRRIGAVKEGDNVVG
SETRVKVVKNKIAAPFKQAEFQILYGEGINFYGELVDLGVKEKLIEKAGAWYSYNGEKIG
QGKANATTWLKENPATAKEIEKRVRELLLSNQNATPDFAVDDS--EGVAETNEDF--
>Salmonella_enterica_subsp._enterica_serovar_Newport_str._USDA-ARS-USMARC-1929_chromosome__complete_genome
MAIDENKQKALAAALGQIEKQFGKGSIMRLGEDRSMDVETISTGSLSLDIALGAGGLPMG
RIVEIYGPESSGKTTLTLQVIAAAQREGKTCAFIDAEHALDPVYARKLGVDIDNLLCSQP
DTGEQALEICDALARSGAVDVIVVDSVAALTPKAEIEGEIGDSHMGLAARMMSQAMRKLA
GNLKQSNTLLIFINQIRMKIGVMFGNPETTTGGNALKFYASVRLDIRRIGAVKEGDNVVG
SETRVKVVKNKIAAPFKQAEFQILYGEGINFYGELVDLGVKEKLIEKAGAWYSYNGEKIG
QGKANATTWLKENPATAKEIEKRVRELLLSNQNATPDFAVDDS--EGVAETNEDF--
>Salmonella_enterica_subsp._enterica_serovar_Hillingdon_str._N1529-D3_chromosome__complete_genome
MAIDENKQKALAAALGQIEKQFGKGSIMRLGEDRSMDVETISTGSLSLDIALGAGGLPMG
RIVEIYGPESSGKTTLTLQVIAAAQREGKTCAFIDAEHALDPVYARKLGVDIDNLLCSQP
DTGEQALEICDALARSGAVDVIVVDSVAALTPKAEIEGEIGDSHMGLAARMMSQAMRKLA
GNLKQSNTLLIFINQIRMKIGVMFGNPETTTGGNALKFYASVRLDIRRIGAVKEGDNVVG
SETRVKVVKNKIAAPFKQAEFQILYGEGINFYGELVDLGVKEKLIEKAGAWYSYNGEKIG
QGKANATTWLKENPATAKEIEKRVRELLLSNQNATPDFAVDDS--EGVAETNEDF--
>Salmonella_enterica_subsp._enterica_serovar_Heidelberg_strain_SA01AB09084001_chromosome__complete_genome
MAIDENKQKALAAALGQIEKQFGKGSIMRLGEDRSMDVETISTGSLSLDIALGAGGLPMG
RIVEIYGPESSGKTTLTLQVIAAAQREGKTCAFIDAEHALDPVYARKLGVDIDNLLCSQP
DTGEQALEICDALARSGAVDVIVVDSVAALTPKAEIEGEIGDSHMGLAARMMSQAMRKLA
GNLKQSNTLLIFINQIRMKIGVMFGNPETTTGGNALKFYASVRLDIRRIGAVKEGDNVVG
SETRVKVVKNKIAAPFKQAEFQILYGEGINFYGELVDLGVKEKLIEKAGAWYSYNGEKIG
QGKANATTWLKENPATAKEIEKRVRELLLSNQNATPDFAVDDS--EGVAETNEDF--
>Salmonella_enterica_subsp._enterica_serovar_Braenderup_str._ATCC_BAA-664_chromosome__complete_genome
MAIDENKQKALAAALGQIEKQFGKGSIMRLGEDRSMDVETISTGSLSLDIALGAGGLPMG
RIVEIYGPESSGKTTLTLQVIAAAQREGKTCAFIDAEHALDPVYARKLGVDIDNLLCSQP
DTGEQALEICDALARSGAVDVIVVDSVAALTPKAEIEGEIGDSHMGLAARMMSQAMRKLA
GNLKQSNTLLIFINQIRMKIGVMFGNPETTTGGNALKFYASVRLDIRRIGAVKEGDNVVG
SETRVKVVKNKIAAPFKQAEFQILYGEGINFYGELVDLGVKEKLIEKAGAWYSYNGEKIG
QGKANATTWLKENPATAKEIEKRVRELLLSNQNATPDFAVDDS--EGVAETNEDF--
>Salmonella_enterica_subsp._enterica_serovar_Mbandaka_str._ATCC_51958__complete_genome
MAIDENKQKALAAALGQIEKQFGKGSIMRLGEDRSMDVETISTGSLSLDIALGAGGLPMG
RIVEIYGPESSGKTTLTLQVIAAAQREGKTCAFIDAEHALDPVYARKLGVDIDNLLCSQP
DTGEQALEICDALARSGAVDVIVVDSVAALTPKAEIEGEIGDSHMGLAARMMSQAMRKLA
GNLKQSNTLLIFINQIRMKIGVMFGNPETTTGGNALKFYASVRLDIRRIGAVKEGDNVVG
SETRVKVVKNKIAAPFKQAEFQILYGEGINFYGELVDLGVKEKLIEKAGAWYSYNGEKIG
QGKANATTWLKENPATAKEIEKRVRELLLSNQNATPDFAVDDS--EGVAETNEDF--
>Salmonella_enterica_subsp._enterica_serovar_Crossness_str._1422-74_chromosome__complete_genome
MAIDENKQKALAAALGQIEKQFGKGSIMRLGEDRSMDVETISTGSLSLDIALGAGGLPMG
RIVEIYGPESSGKTTLTLQVIAAAQREGKTCAFIDAEHALDPVYARKLGVDIDNLLCSQP
DTGEQALEICDALARSGAVDVIVVDSVAALTPKAEIEGEIGDSHMGLAARMMSQAMRKLA
GNLKQSNTLLIFINQIRMKIGVMFGNPETTTGGNALKFYASVRLDIRRIGAVKEGDNVVG
SETRVKVVKNKIAAPFKQAEFQILYGEGINFYGELVDLGVKEKLIEKAGAWYSYNGEKIG
QGKANATTWLKENPATAKEIEKRVRELLLSNQNATPDFAVDDS--EGVAETNEDF--
>Salmonella_enterica_subsp._enterica_serovar_Typhimurium_strain_SAP17-7299_chromosome__complete_genome
MAIDENKQKALAAALGQIEKQFGKGSIMRLGEDRSMDVETISTGSLSLDIALGAGGLPMG
RIVEIYGPESSGKTTLTLQVIAAAQREGKTCAFIDAEHALDPVYARKLGVDIDNLLCSQP
DTGEQALEICDALARSGAVDVIVVDSVAALTPKAEIEGEIGDSHMGLAARMMSQAMRKLA
GNLKQSNTLLIFINQIRMKIGVMFGNPETTTGGNALKFYASVRLDIRRIGAVKEGDNVVG
SETRVKVVKNKIAAPFKQAEFQILYGEGINFYGELVDLGVKEKLIEKAGAWYSYNGEKIG
QGKANATTWLKENPATAKEIEKRVRELLLSNQNATPDFAVDDS--EGVAETNEDF--
>Salmonella_enterica_strain_FORC_079_chromosome__complete_genome
MAIDENKQKALAAALGQIEKQFGKGSIMRLGEDRSMDVETISTGSLSLDIALGAGGLPMG
RIVEIYGPESSGKTTLTLQVIAAAQREGKTCAFIDAEHALDPVYARKLGVDIDNLLCSQP
DTGEQALEICDALARSGAVDVIVVDSVAALTPKAEIEGEIGDSHMGLAARMMSQAMRKLA
GNLKQSNTLLIFINQIRMKIGVMFGNPETTTGGNALKFYASVRLDIRRIGAVKEGDNVVG
SETRVKVVKNKIAAPFKQAEFQILYGEGINFYGELVDLGVKEKLIEKAGAWYSYNGEKIG
QGKANATTWLKENPATAKEIEKRVRELLLSNQNATPDFAVDDS--EGVAETNEDF--
>Salmonella_enterica_subsp._enterica_serovar_Inverness_str._ATCC_10720_chromosome__complete_genome
MAIDENKQKALAAALGQIEKQFGKGSIMRLGEDRSMDVETISTGSLSLDIALGAGGLPMG
RIVEIYGPESSGKTTLTLQVIAAAQREGKTCAFIDAEHALDPVYARKLGVDIDNLLCSQP
DTGEQALEICDALARSGAVDVIVVDSVAALTPKAEIEGEIGDSHMGLAARMMSQAMRKLA
GNLKQSNTLLIFINQIRMKIGVMFGNPETTTGGNALKFYASVRLDIRRIGAVKEGDNVVG
SETRVKVVKNKIAAPFKQAEFQILYGEGINFYGELVDLGVKEKLIEKAGAWYSYNGEKIG
QGKANATTWLKENPATAKEIEKRVRELLLSNQNATPDFAVDDS--EGVAETNEDF--
>Salmonella_enterica_subsp._enterica_serovar_Typhimurium_strain_SAP17-7699_chromosome__complete_genome
MAIDENKQKALAAALGQIEKQFGKGSIMRLGEDRSMDVETISTGSLSLDIALGAGGLPMG
RIVEIYGPESSGKTTLTLQVIAAAQREGKTCAFIDAEHALDPVYARKLGVDIDNLLCSQP
DTGEQALEICDALARSGAVDVIVVDSVAALTPKAEIEGEIGDSHMGLAARMMSQAMRKLA
GNLKQSNTLLIFINQIRMKIGVMFGNPETTTGGNALKFYASVRLDIRRIGAVKEGDNVVG
SETRVKVVKNKIAAPFKQAEFQILYGEGINFYGELVDLGVKEKLIEKAGAWYSYNGEKIG
QGKANATTWLKENPATAKEIEKRVRELLLSNQNATPDFAVDDS--EGVAETNEDF--
>Salmonella_enterica_strain_GTA-FD-2016-MI-02533-1_chromosome__complete_genome
MAIDENKQKALAAALGQIEKQFGKGSIMRLGEDRSMDVETISTGSLSLDIALGAGGLPMG
RIVEIYGPESSGKTTLTLQVIAAAQREGKTCAFIDAEHALDPVYARKLGVDIDNLLCSQP
DTGEQALEICDALARSGAVDVIVVDSVAALTPKAEIEGEIGDSHMGLAARMMSQAMRKLA
GNLKQSNTLLIFINQIRMKIGVMFGNPETTTGGNALKFYASVRLDIRRIGAVKEGDNVVG
SETRVKVVKNKIAAPFKQAEFQILYGEGINFYGELVDLGVKEKLIEKAGAWYSYNGEKIG
QGKANATTWLKENPATAKEIEKRVRELLLSNQNATPDFAVDDS--EGVAETNEDF--
>Salmonella_enterica_subsp._enterica_serovar_Heidelberg_str._CFSAN002069__complete_genome
MAIDENKQKALAAALGQIEKQFGKGSIMRLGEDRSMDVETISTGSLSLDIALGAGGLPMG
RIVEIYGPESSGKTTLTLQVIAAAQREGKTCAFIDAEHALDPVYARKLGVDIDNLLCSQP
DTGEQALEICDALARSGAVDVIVVDSVAALTPKAEIEGEIGDSHMGLAARMMSQAMRKLA
GNLKQSNTLLIFINQIRMKIGVMFGNPETTTGGNALKFYASVRLDIRRIGAVKEGDNVVG
SETRVKVVKNKIAAPFKQAEFQILYGEGINFYGELVDLGVKEKLIEKAGAWYSYNGEKIG
QGKANATTWLKENPATAKEIEKRVRELLLSNQNATPDFAVDDS--EGVAETNEDF--
>Salmonella_enterica_subsp._enterica_serovar_Heidelberg_strain_SH12-007_chromosome__complete_genome
MAIDENKQKALAAALGQIEKQFGKGSIMRLGEDRSMDVETISTGSLSLDIALGAGGLPMG
RIVEIYGPESSGKTTLTLQVIAAAQREGKTCAFIDAEHALDPVYARKLGVDIDNLLCSQP
DTGEQALEICDALARSGAVDVIVVDSVAALTPKAEIEGEIGDSHMGLAARMMSQAMRKLA
GNLKQSNTLLIFINQIRMKIGVMFGNPETTTGGNALKFYASVRLDIRRIGAVKEGDNVVG
SETRVKVVKNKIAAPFKQAEFQILYGEGINFYGELVDLGVKEKLIEKAGAWYSYNGEKIG
QGKANATTWLKENPATAKEIEKRVRELLLSNQNATPDFAVDDS--EGVAETNEDF--
>Salmonella_enterica_subsp._enterica_serovar_Bareilly_str._CFSAN000960_chromosome__complete_genome
MAIDENKQKALAAALGQIEKQFGKGSIMRLGEDRSMDVETISTGSLSLDIALGAGGLPMG
RIVEIYGPESSGKTTLTLQVIAAAQREGKTCAFIDAEHALDPVYARKLGVDIDNLLCSQP
DTGEQALEICDALARSGAVDVIVVDSVAALTPKAEIEGEIGDSHMGLAARMMSQAMRKLA
GNLKQSNTLLIFINQIRMKIGVMFGNPETTTGGNALKFYASVRLDIRRIGAVKEGDNVVG
SETRVKVVKNKIAAPFKQAEFQILYGEGINFYGELVDLGVKEKLIEKAGAWYSYNGEKIG
QGKANATTWLKENPATAKEIEKRVRELLLSNQNATPDFAVDDS--EGVAETNEDF--
>Salmonella_enterica_subsp._enterica_serovar_Gallinarum_str._9184__complete_genome
MAIDENKQKALAAALGQIEKQFGKGSIMRLGEDRSMDVETISTGSLSLDIALGAGGLPMG
RIVEIYGPESSGKTTLTLQVIAAAQREGKTCAFIDAEHALDPVYARKLGVDIDNLLCSQP
DTGEQALEICDALARSGAVDVIVVDSVAALTPKAEIEGEIGDSHMGLAARMMSQAMRKLA
GNLKQSNTLLIFINQIRMKIGVMFGNPETTTGGNALKFYASVRLDIRRIGAVKEGDNVVG
SETRVKVVKNKIAAPFKQAEFQILYGEGINFYGELVDLGVKEKLIEKAGAWYSYNGEKIG
QGKANATTWLKENPATAKEIEKRVRELLLSNQNATPDFAVDDS--EGVAETNEDF--
>Salmonella_enterica_subsp._enterica_serovar_Enteritidis_str._SA20083636__complete_genome
MAIDENKQKALAAALGQIEKQFGKGSIMRLGEDRSMDVETISTGSLSLDIALGAGGLPMG
RIVEIYGPESSGKTTLTLQVIAAAQREGKTCAFIDAEHALDPVYARKLGVDIDNLLCSQP
DTGEQALEICDALARSGAVDVIVVDSVAALTPKAEIEGEIGDSHMGLAARMMSQAMRKLA
GNLKQSNTLLIFINQIRMKIGVMFGNPETTTGGNALKFYASVRLDIRRIGAVKEGDNVVG
SETRVKVVKNKIAAPFKQAEFQILYGEGINFYGELVDLGVKEKLIEKAGAWYSYNGEKIG
QGKANATTWLKENPATAKEIEKRVRELLLSNQNATPDFAVDDS--EGVAETNEDF--
>Salmonella_enterica_subsp._enterica_serovar_Montevideo_str._USDA-ARS-USMARC-1913_chromosome__complete_genome
MAIDENKQKALAAALGQIEKQFGKGSIMRLGEDRSMDVETISTGSLSLDIALGAGGLPMG
RIVEIYGPESSGKTTLTLQVIAAAQREGKTCAFIDAEHALDPVYARKLGVDIDNLLCSQP
DTGEQALEICDALARSGAVDVIVVDSVAALTPKAEIEGEIGDSHMGLAARMMSQAMRKLA
GNLKQSNTLLIFINQIRMKIGVMFGNPETTTGGNALKFYASVRLDIRRIGAVKEGDNVVG
SETRVKVVKNKIAAPFKQAEFQILYGEGINFYGELVDLGVKEKLIEKAGAWYSYNGEKIG
QGKANATTWLKENPATAKEIEKRVRELLLSNQNATPDFAVDDS--EGVAETNEDF--
>Salmonella_enterica_subsp._enterica_serovar_Typhimurium_strain_SAP18-6199_chromosome__complete_genome
MAIDENKQKALAAALGQIEKQFGKGSIMRLGEDRSMDVETISTGSLSLDIALGAGGLPMG
RIVEIYGPESSGKTTLTLQVIAAAQREGKTCAFIDAEHALDPVYARKLGVDIDNLLCSQP
DTGEQALEICDALARSGAVDVIVVDSVAALTPKAEIEGEIGDSHMGLAARMMSQAMRKLA
GNLKQSNTLLIFINQIRMKIGVMFGNPETTTGGNALKFYASVRLDIRRIGAVKEGDNVVG
SETRVKVVKNKIAAPFKQAEFQILYGEGINFYGELVDLGVKEKLIEKAGAWYSYNGEKIG
QGKANATTWLKENPATAKEIEKRVRELLLSNQNATPDFAVDDS--EGVAETNEDF--
>Salmonella_enterica_subsp._enterica_serovar_Bredeney_strain_SA20114778WT_chromosome__complete_genome
MAIDENKQKALAAALGQIEKQFGKGSIMRLGEDRSMDVETISTGSLSLDIALGAGGLPMG
RIVEIYGPESSGKTTLTLQVIAAAQREGKTCAFIDAEHALDPVYARKLGVDIDNLLCSQP
DTGEQALEICDALARSGAVDVIVVDSVAALTPKAEIEGEIGDSHMGLAARMMSQAMRKLA
GNLKQSNTLLIFINQIRMKIGVMFGNPETTTGGNALKFYASVRLDIRRIGAVKEGDNVVG
SETRVKVVKNKIAAPFKQAEFQILYGEGINFYGELVDLGVKEKLIEKAGAWYSYNGEKIG
QGKANATTWLKENPATAKEIEKRVRELLLSNQNATPDFAVDDS--EGVAETNEDF--
>Salmonella_enterica_subsp._enterica_serovar_Anatum_strain_GT-38__complete_genome
MAIDENKQKALAAALGQIEKQFGKGSIMRLGEDRSMDVETISTGSLSLDIALGAGGLPMG
RIVEIYGPESSGKTTLTLQVIAAAQREGKTCAFIDAEHALDPVYARKLGVDIDNLLCSQP
DTGEQALEICDALARSGAVDVIVVDSVAALTPKAEIEGEIGDSHMGLAARMMSQAMRKLA
GNLKQSNTLLIFINQIRMKIGVMFGNPETTTGGNALKFYASVRLDIRRIGAVKEGDNVVG
SETRVKVVKNKIAAPFKQAEFQILYGEGINFYGELVDLGVKEKLIEKAGAWYSYNGEKIG
QGKANATTWLKENPATAKEIEKRVRELLLSNQNATPDFAVDDS--EGVAETNEDF--
>Salmonella_enterica_subsp._enterica_serovar_Typhimurium_str._ST4
MAIDENKQKALAAALGQIEKQFGKGSIMRLGEDRSMDVETISTGSLSLDIALGAGGLPMG
RIVEIYGPESSGKTTLTLQVIAAAQREGKTCAFIDAEHALDPVYARKLGVDIDNLLCSQP
DTGEQALEICDALARSGAVDVIVVDSVAALTPKAEIEGEIGDSHMGLAARMMSQAMRKLA
GNLKQSNTLLIFINQIRMKIGVMFGNPETTTGGNALKFYASVRLDIRRIGAVKEGDNVVG
SETRVKVVKNKIAAPFKQAEFQILYGEGINFYGELVDLGVKEKLIEKAGAWYSYNGEKIG
QGKANATTWLKENPATAKEIEKRVRELLLSNQNATPDFAVDDS--EGVAETNEDF--
>Salmonella_enterica_subsp._enterica_serovar_Typhimurium_strain_sg_wt7_chromosome__complete_genome
MAIDENKQKALAAALGQIEKQFGKGSIMRLGEDRSMDVETISTGSLSLDIALGAGGLPMG
RIVEIYGPESSGKTTLTLQVIAAAQREGKTCAFIDAEHALDPVYARKLGVDIDNLLCSQP
DTGEQALEICDALARSGAVDVIVVDSVAALTPKAEIEGEIGDSHMGLAARMMSQAMRKLA
GNLKQSNTLLIFINQIRMKIGVMFGNPETTTGGNALKFYASVRLDIRRIGAVKEGDNVVG
SETRVKVVKNKIAAPFKQAEFQILYGEGINFYGELVDLGVKEKLIEKAGAWYSYNGEKIG
QGKANATTWLKENPATAKEIEKRVRELLLSNQNATPDFAVDDS--EGVAETNEDF--
>Salmonella_enterica_subsp._enterica_serovar_Bareilly_str._CFSAN001140_chromosome__complete_genome
MAIDENKQKALAAALGQIEKQFGKGSIMRLGEDRSMDVETISTGSLSLDIALGAGGLPMG
RIVEIYGPESSGKTTLTLQVIAAAQREGKTCAFIDAEHALDPVYARKLGVDIDNLLCSQP
DTGEQALEICDALARSGAVDVIVVDSVAALTPKAEIEGEIGDSHMGLAARMMSQAMRKLA
GNLKQSNTLLIFINQIRMKIGVMFGNPETTTGGNALKFYASVRLDIRRIGAVKEGDNVVG
SETRVKVVKNKIAAPFKQAEFQILYGEGINFYGELVDLGVKEKLIEKAGAWYSYNGEKIG
QGKANATTWLKENPATAKEIEKRVRELLLSNQNATPDFAVDDS--EGVAETNEDF--
>Salmonella_enterica_subsp._enterica_serovar_Heidelberg_strain_SL-312_chromosome__complete_genome
MAIDENKQKALAAALGQIEKQFGKGSIMRLGEDRSMDVETISTGSLSLDIALGAGGLPMG
RIVEIYGPESSGKTTLTLQVIAAAQREGKTCAFIDAEHALDPVYARKLGVDIDNLLCSQP
DTGEQALEICDALARSGAVDVIVVDSVAALTPKAEIEGEIGDSHMGLAARMMSQAMRKLA
GNLKQSNTLLIFINQIRMKIGVMFGNPETTTGGNALKFYASVRLDIRRIGAVKEGDNVVG
SETRVKVVKNKIAAPFKQAEFQILYGEGINFYGELVDLGVKEKLIEKAGAWYSYNGEKIG
QGKANATTWLKENPATAKEIEKRVRELLLSNQNATPDFAVDDS--EGVAETNEDF--
>Salmonella_enterica_subsp._enterica_serovar_Enteritidis_strain_OLF-SE8-1021710__complete_genome
MAIDENKQKALAAALGQIEKQFGKGSIMRLGEDRSMDVETISTGSLSLDIALGAGGLPMG
RIVEIYGPESSGKTTLTLQVIAAAQREGKTCAFIDAEHALDPVYARKLGVDIDNLLCSQP
DTGEQALEICDALARSGAVDVIVVDSVAALTPKAEIEGEIGDSHMGLAARMMSQAMRKLA
GNLKQSNTLLIFINQIRMKIGVMFGNPETTTGGNALKFYASVRLDIRRIGAVKEGDNVVG
SETRVKVVKNKIAAPFKQAEFQILYGEGINFYGELVDLGVKEKLIEKAGAWYSYNGEKIG
QGKANATTWLKENPATAKEIEKRVRELLLSNQNATPDFAVDDS--EGVAETNEDF--
>Salmonella_enterica_subsp._enterica_serovar_Typhimurium_strain_33676__complete_genome
MAIDENKQKALAAALGQIEKQFGKGSIMRLGEDRSMDVETISTGSLSLDIALGAGGLPMG
RIVEIYGPESSGKTTLTLQVIAAAQREGKTCAFIDAEHALDPVYARKLGVDIDNLLCSQP
DTGEQALEICDALARSGAVDVIVVDSVAALTPKAEIEGEIGDSHMGLAARMMSQAMRKLA
GNLKQSNTLLIFINQIRMKIGVMFGNPETTTGGNALKFYASVRLDIRRIGAVKEGDNVVG
SETRVKVVKNKIAAPFKQAEFQILYGEGINFYGELVDLGVKEKLIEKAGAWYSYNGEKIG
QGKANATTWLKENPATAKEIEKRVRELLLSNQNATPDFAVDDS--EGVAETNEDF--
>Salmonella_enterica_subsp._enterica_serovar_Agona_strain_USDA-ARS-USMARC-76339_chromosome__complete_genome
MAIDENKQKALAAALGQIEKQFGKGSIMRLGEDRSMDVETISTGSLSLDIALGAGGLPMG
RIVEIYGPESSGKTTLTLQVIAAAQREGKTCAFIDAEHALDPVYARKLGVDIDNLLCSQP
DTGEQALEICDALARSGAVDVIVVDSVAALTPKAEIEGEIGDSHMGLAARMMSQAMRKLA
GNLKQSNTLLIFINQIRMKIGVMFGNPETTTGGNALKFYASVRLDIRRIGAVKEGDNVVG
SETRVKVVKNKIAAPFKQAEFQILYGEGINFYGELVDLGVKEKLIEKAGAWYSYNGEKIG
QGKANATTWLKENPATAKEIEKRVRELLLSNQNATPDFAVDDS--EGVAETNEDF--
>Salmonella_enterica_subsp._enterica_serovar_Bardo_strain_SA20113257_chromosome__complete_genome
MAIDENKQKALAAALGQIEKQFGKGSIMRLGEDRSMDVETISTGSLSLDIALGAGGLPMG
RIVEIYGPESSGKTTLTLQVIAAAQREGKTCAFIDAEHALDPVYARKLGVDIDNLLCSQP
DTGEQALEICDALARSGAVDVIVVDSVAALTPKAEIEGEIGDSHMGLAARMMSQAMRKLA
GNLKQSNTLLIFINQIRMKIGVMFGNPETTTGGNALKFYASVRLDIRRIGAVKEGDNVVG
SETRVKVVKNKIAAPFKQAEFQILYGEGINFYGELVDLGVKEKLIEKAGAWYSYNGEKIG
QGKANATTWLKENPATAKEIEKRVRELLLSNQNATPDFAVDDS--EGVAETNEDF--
>Salmonella_enterica_strain_7_isolate_CFSAN047352_chromosome__complete_genome
MAIDENKQKALAAALGQIEKQFGKGSIMRLGEDRSMDVETISTGSLSLDIALGAGGLPMG
RIVEIYGPESSGKTTLTLQVIAAAQREGKTCAFIDAEHALDPVYARKLGVDIDNLLCSQP
DTGEQALEICDALARSGAVDVIVVDSVAALTPKAEIEGEIGDSHMGLAARMMSQAMRKLA
GNLKQSNTLLIFINQIRMKIGVMFGNPETTTGGNALKFYASVRLDIRRIGAVKEGDNVVG
SETRVKVVKNKIAAPFKQAEFQILYGEGINFYGELVDLGVKEKLIEKAGAWYSYNGEKIG
QGKANATTWLKENPATAKEIEKRVRELLLSNQNATPDFAVDDS--EGVAETNEDF--
>Salmonella_enterica_strain_FDAARGOS_312_chromosome__complete_genome
MAIDENKQKALAAALGQIEKQFGKGSIMRLGEDRSMDVETISTGSLSLDIALGAGGLPMG
RIVEIYGPESSGKTTLTLQVIAAAQREGKTCAFIDAEHALDPVYARKLGVDIDNLLCSQP
DTGEQALEICDALARSGAVDVIVVDSVAALTPKAEIEGEIGDSHMGLAARMMSQAMRKLA
GNLKQSNTLLIFINQIRMKIGVMFGNPETTTGGNALKFYASVRLDIRRIGAVKEGDNVVG
SETRVKVVKNKIAAPFKQAEFQILYGEGINFYGELVDLGVKEKLIEKAGAWYSYNGEKIG
QGKANATTWLKENPATAKEIEKRVRELLLSNQNATPDFAVDDS--EGVAETNEDF--
>Salmonella_enterica_subsp._enterica_serovar_Enteritidis_strain_OLF-SE10-10052__complete_genome
MAIDENKQKALAAALGQIEKQFGKGSIMRLGEDRSMDVETISTGSLSLDIALGAGGLPMG
RIVEIYGPESSGKTTLTLQVIAAAQREGKTCAFIDAEHALDPVYARKLGVDIDNLLCSQP
DTGEQALEICDALARSGAVDVIVVDSVAALTPKAEIEGEIGDSHMGLAARMMSQAMRKLA
GNLKQSNTLLIFINQIRMKIGVMFGNPETTTGGNALKFYASVRLDIRRIGAVKEGDNVVG
SETRVKVVKNKIAAPFKQAEFQILYGEGINFYGELVDLGVKEKLIEKAGAWYSYNGEKIG
QGKANATTWLKENPATAKEIEKRVRELLLSNQNATPDFAVDDS--EGVAETNEDF--
>Salmonella_enterica_subsp._enterica_serovar_Agona_str._392869-2_chromosome__complete_genome
MAIDENKQKALAAALGQIEKQFGKGSIMRLGEDRSMDVETISTGSLSLDIALGAGGLPMG
RIVEIYGPESSGKTTLTLQVIAAAQREGKTCAFIDAEHALDPVYARKLGVDIDNLLCSQP
DTGEQALEICDALARSGAVDVIVVDSVAALTPKAEIEGEIGDSHMGLAARMMSQAMRKLA
GNLKQSNTLLIFINQIRMKIGVMFGNPETTTGGNALKFYASVRLDIRRIGAVKEGDNVVG
SETRVKVVKNKIAAPFKQAEFQILYGEGINFYGELVDLGVKEKLIEKAGAWYSYNGEKIG
QGKANATTWLKENPATAKEIEKRVRELLLSNQNATPDFAVDDS--EGVAETNEDF--
>Salmonella_enterica_subsp._enterica_serovar_Worthington_strain_7102.58_chromosome__complete_genome
MAIDENKQKALAAALGQIEKQFGKGSIMRLGEDRSMDVETISTGSLSLDIALGAGGLPMG
RIVEIYGPESSGKTTLTLQVIAAAQREGKTCAFIDAEHALDPVYARKLGVDIDNLLCSQP
DTGEQALEICDALARSGAVDVIVVDSVAALTPKAEIEGEIGDSHMGLAARMMSQAMRKLA
GNLKQSNTLLIFINQIRMKIGVMFGNPETTTGGNALKFYASVRLDIRRIGAVKEGDNVVG
SETRVKVVKNKIAAPFKQAEFQILYGEGINFYGELVDLGVKEKLIEKAGAWYSYNGEKIG
QGKANATTWLKENPATAKEIEKRVRELLLSNQNATPDFAVDDS--EGVAETNEDF--
>Salmonella_enterica_subsp._enterica_serovar_Enteritidis_str._SA19994216__complete_genome
MAIDENKQKALAAALGQIEKQFGKGSIMRLGEDRSMDVETISTGSLSLDIALGAGGLPMG
RIVEIYGPESSGKTTLTLQVIAAAQREGKTCAFIDAEHALDPVYARKLGVDIDNLLCSQP
DTGEQALEICDALARSGAVDVIVVDSVAALTPKAEIEGEIGDSHMGLAARMMSQAMRKLA
GNLKQSNTLLIFINQIRMKIGVMFGNPETTTGGNALKFYASVRLDIRRIGAVKEGDNVVG
SETRVKVVKNKIAAPFKQAEFQILYGEGINFYGELVDLGVKEKLIEKAGAWYSYNGEKIG
QGKANATTWLKENPATAKEIEKRVRELLLSNQNATPDFAVDDS--EGVAETNEDF--
>Salmonella_enterica_subsp._enterica_serovar_Typhimurium_str._UK-1__complete_genome
MAIDENKQKALAAALGQIEKQFGKGSIMRLGEDRSMDVETISTGSLSLDIALGAGGLPMG
RIVEIYGPESSGKTTLTLQVIAAAQREGKTCAFIDAEHALDPVYARKLGVDIDNLLCSQP
DTGEQALEICDALARSGAVDVIVVDSVAALTPKAEIEGEIGDSHMGLAARMMSQAMRKLA
GNLKQSNTLLIFINQIRMKIGVMFGNPETTTGGNALKFYASVRLDIRRIGAVKEGDNVVG
SETRVKVVKNKIAAPFKQAEFQILYGEGINFYGELVDLGVKEKLIEKAGAWYSYNGEKIG
QGKANATTWLKENPATAKEIEKRVRELLLSNQNATPDFAVDDS--EGVAETNEDF--
>Salmonella_enterica_subsp._enterica_serovar_Tennessee_strain_CFSAN001387_chromosome__complete_genome
MAIDENKQKALAAALGQIEKQFGKGSIMRLGEDRSMDVETISTGSLSLDIALGAGGLPMG
RIVEIYGPESSGKTTLTLQVIAAAQREGKTCAFIDAEHALDPVYARKLGVDIDNLLCSQP
DTGEQALEICDALARSGAVDVIVVDSVAALTPKAEIEGEIGDSHMGLAARMMSQAMRKLA
GNLKQSNTLLIFINQIRMKIGVMFGNPETTTGGNALKFYASVRLDIRRIGAVKEGDNVVG
SETRVKVVKNKIAAPFKQAEFQILYGEGINFYGELVDLGVKEKLIEKAGAWYSYNGEKIG
QGKANATTWLKENPATAKEIEKRVRELLLSNQNATPDFAVDDS--EGVAETNEDF--
>Salmonella_enterica_subsp._enterica_serovar_Derby_strain_SA20035215_chromosome__complete_genome
MAIDENKQKALAAALGQIEKQFGKGSIMRLGEDRSMDVETISTGSLSLDIALGAGGLPMG
RIVEIYGPESSGKTTLTLQVIAAAQREGKTCAFIDAEHALDPVYARKLGVDIDNLLCSQP
DTGEQALEICDALARSGAVDVIVVDSVAALTPKAEIEGEIGDSHMGLAARMMSQAMRKLA
GNLKQSNTLLIFINQIRMKIGVMFGNPETTTGGNALKFYASVRLDIRRIGAVKEGDNVVG
SETRVKVVKNKIAAPFKQAEFQILYGEGINFYGELVDLGVKEKLIEKAGAWYSYNGEKIG
QGKANATTWLKENPATAKEIEKRVRELLLSNQNATPDFAVDDS--EGVAETNEDF--
>Salmonella_enterica_subsp._enterica_strain_USDA-ARS-USMARC-60984_chromosome__complete_genome
MAIDENKQKALAAALGQIEKQFGKGSIMRLGEDRSMDVETISTGSLSLDIALGAGGLPMG
RIVEIYGPESSGKTTLTLQVIAAAQREGKTCAFIDAEHALDPVYARKLGVDIDNLLCSQP
DTGEQALEICDALARSGAVDVIVVDSVAALTPKAEIEGEIGDSHMGLAARMMSQAMRKLA
GNLKQSNTLLIFINQIRMKIGVMFGNPETTTGGNALKFYASVRLDIRRIGAVKEGDNVVG
SETRVKVVKNKIAAPFKQAEFQILYGEGINFYGELVDLGVKEKLIEKAGAWYSYNGEKIG
QGKANATTWLKENPATAKEIEKRVRELLLSNQNATPDFAVDDS--EGVAETNEDF--
>Salmonella_enterica_subsp._enterica_serovar_Anatum_str._USDA-ARS-USMARC-1727__complete_genome
MAIDENKQKALAAALGQIEKQFGKGSIMRLGEDRSMDVETISTGSLSLDIALGAGGLPMG
RIVEIYGPESSGKTTLTLQVIAAAQREGKTCAFIDAEHALDPVYARKLGVDIDNLLCSQP
DTGEQALEICDALARSGAVDVIVVDSVAALTPKAEIEGEIGDSHMGLAARMMSQAMRKLA
GNLKQSNTLLIFINQIRMKIGVMFGNPETTTGGNALKFYASVRLDIRRIGAVKEGDNVVG
SETRVKVVKNKIAAPFKQAEFQILYGEGINFYGELVDLGVKEKLIEKAGAWYSYNGEKIG
QGKANATTWLKENPATAKEIEKRVRELLLSNQNATPDFAVDDS--EGVAETNEDF--
>Salmonella_enterica_subsp._enterica_serovar_Bareilly_str._CFSAN000961_chromosome__complete_genome
MAIDENKQKALAAALGQIEKQFGKGSIMRLGEDRSMDVETISTGSLSLDIALGAGGLPMG
RIVEIYGPESSGKTTLTLQVIAAAQREGKTCAFIDAEHALDPVYARKLGVDIDNLLCSQP
DTGEQALEICDALARSGAVDVIVVDSVAALTPKAEIEGEIGDSHMGLAARMMSQAMRKLA
GNLKQSNTLLIFINQIRMKIGVMFGNPETTTGGNALKFYASVRLDIRRIGAVKEGDNVVG
SETRVKVVKNKIAAPFKQAEFQILYGEGINFYGELVDLGVKEKLIEKAGAWYSYNGEKIG
QGKANATTWLKENPATAKEIEKRVRELLLSNQNATPDFAVDDS--EGVAETNEDF--
>Salmonella_enterica_subsp._enterica_serovar_Typhimurium_str._DT2__complete_genome
MAIDENKQKALAAALGQIEKQFGKGSIMRLGEDRSMDVETISTGSLSLDIALGAGGLPMG
RIVEIYGPESSGKTTLTLQVIAAAQREGKTCAFIDAEHALDPVYARKLGVDIDNLLCSQP
DTGEQALEICDALARSGAVDVIVVDSVAALTPKAEIEGEIGDSHMGLAARMMSQAMRKLA
GNLKQSNTLLIFINQIRMKIGVMFGNPETTTGGNALKFYASVRLDIRRIGAVKEGDNVVG
SETRVKVVKNKIAAPFKQAEFQILYGEGINFYGELVDLGVKEKLIEKAGAWYSYNGEKIG
QGKANATTWLKENPATAKEIEKRVRELLLSNQNATPDFAVDDS--EGVAETNEDF--
>Salmonella_enterica_subsp._enterica_serovar_Infantis_strain_FSIS1502169__complete_genome
MAIDENKQKALAAALGQIEKQFGKGSIMRLGEDRSMDVETISTGSLSLDIALGAGGLPMG
RIVEIYGPESSGKTTLTLQVIAAAQREGKTCAFIDAEHALDPVYARKLGVDIDNLLCSQP
DTGEQALEICDALARSGAVDVIVVDSVAALTPKAEIEGEIGDSHMGLAARMMSQAMRKLA
GNLKQSNTLLIFINQIRMKIGVMFGNPETTTGGNALKFYASVRLDIRRIGAVKEGDNVVG
SETRVKVVKNKIAAPFKQAEFQILYGEGINFYGELVDLGVKEKLIEKAGAWYSYNGEKIG
QGKANATTWLKENPATAKEIEKRVRELLLSNQNATPDFAVDDS--EGVAETNEDF--
>Salmonella_enterica_subsp._enterica_serovar_Montevideo_str._507440-20__complete_genome
MAIDENKQKALAAALGQIEKQFGKGSIMRLGEDRSMDVETISTGSLSLDIALGAGGLPMG
RIVEIYGPESSGKTTLTLQVIAAAQREGKTCAFIDAEHALDPVYARKLGVDIDNLLCSQP
DTGEQALEICDALARSGAVDVIVVDSVAALTPKAEIEGEIGDSHMGLAARMMSQAMRKLA
GNLKQSNTLLIFINQIRMKIGVMFGNPETTTGGNALKFYASVRLDIRRIGAVKEGDNVVG
SETRVKVVKNKIAAPFKQAEFQILYGEGINFYGELVDLGVKEKLIEKAGAWYSYNGEKIG
QGKANATTWLKENPATAKEIEKRVRELLLSNQNATPDFAVDDS--EGVAETNEDF--
>Salmonella_enterica_subsp._enterica_serovar_Bareilly_str._CFSAN000970_chromosome__complete_genome
MAIDENKQKALAAALGQIEKQFGKGSIMRLGEDRSMDVETISTGSLSLDIALGAGGLPMG
RIVEIYGPESSGKTTLTLQVIAAAQREGKTCAFIDAEHALDPVYARKLGVDIDNLLCSQP
DTGEQALEICDALARSGAVDVIVVDSVAALTPKAEIEGEIGDSHMGLAARMMSQAMRKLA
GNLKQSNTLLIFINQIRMKIGVMFGNPETTTGGNALKFYASVRLDIRRIGAVKEGDNVVG
SETRVKVVKNKIAAPFKQAEFQILYGEGINFYGELVDLGVKEKLIEKAGAWYSYNGEKIG
QGKANATTWLKENPATAKEIEKRVRELLLSNQNATPDFAVDDS--EGVAETNEDF--
>Salmonella_enterica_subsp._enterica_serovar_Newport_strain_0307-213__complete_genome
MAIDENKQKALAAALGQIEKQFGKGSIMRLGEDRSMDVETISTGSLSLDIALGAGGLPMG
RIVEIYGPESSGKTTLTLQVIAAAQREGKTCAFIDAEHALDPVYARKLGVDIDNLLCSQP
DTGEQALEICDALARSGAVDVIVVDSVAALTPKAEIEGEIGDSHMGLAARMMSQAMRKLA
GNLKQSNTLLIFINQIRMKIGVMFGNPETTTGGNALKFYASVRLDIRRIGAVKEGDNVVG
SETRVKVVKNKIAAPFKQAEFQILYGEGINFYGELVDLGVKEKLIEKAGAWYSYNGEKIG
QGKANATTWLKENPATAKEIEKRVRELLLSNQNATPDFAVDDS--EGVAETNEDF--
>Salmonella_enterica_subsp._enterica_serovar_Agona_strain_USDA-ARS-USMARC-76335_chromosome__complete_genome
MAIDENKQKALAAALGQIEKQFGKGSIMRLGEDRSMDVETISTGSLSLDIALGAGGLPMG
RIVEIYGPESSGKTTLTLQVIAAAQREGKTCAFIDAEHALDPVYARKLGVDIDNLLCSQP
DTGEQALEICDALARSGAVDVIVVDSVAALTPKAEIEGEIGDSHMGLAARMMSQAMRKLA
GNLKQSNTLLIFINQIRMKIGVMFGNPETTTGGNALKFYASVRLDIRRIGAVKEGDNVVG
SETRVKVVKNKIAAPFKQAEFQILYGEGINFYGELVDLGVKEKLIEKAGAWYSYNGEKIG
QGKANATTWLKENPATAKEIEKRVRELLLSNQNATPDFAVDDS--EGVAETNEDF--
>Salmonella_enterica_subsp._enterica_serovar_Newport_strain_CFSAN001660__complete_genome
MAIDENKQKALAAALGQIEKQFGKGSIMRLGEDRSMDVETISTGSLSLDIALGAGGLPMG
RIVEIYGPESSGKTTLTLQVIAAAQREGKTCAFIDAEHALDPVYARKLGVDIDNLLCSQP
DTGEQALEICDALARSGAVDVIVVDSVAALTPKAEIEGEIGDSHMGLAARMMSQAMRKLA
GNLKQSNTLLIFINQIRMKIGVMFGNPETTTGGNALKFYASVRLDIRRIGAVKEGDNVVG
SETRVKVVKNKIAAPFKQAEFQILYGEGINFYGELVDLGVKEKLIEKAGAWYSYNGEKIG
QGKANATTWLKENPATAKEIEKRVRELLLSNQNATPDFAVDDS--EGVAETNEDF--
>Salmonella_enterica_subsp._enterica_serovar_Newport_str._CVM_22513__complete_genome
MAIDENKQKALAAALGQIEKQFGKGSIMRLGEDRSMDVETISTGSLSLDIALGAGGLPMG
RIVEIYGPESSGKTTLTLQVIAAAQREGKTCAFIDAEHALDPVYARKLGVDIDNLLCSQP
DTGEQALEICDALARSGAVDVIVVDSVAALTPKAEIEGEIGDSHMGLAARMMSQAMRKLA
GNLKQSNTLLIFINQIRMKIGVMFGNPETTTGGNALKFYASVRLDIRRIGAVKEGDNVVG
SETRVKVVKNKIAAPFKQAEFQILYGEGINFYGELVDLGVKEKLIEKAGAWYSYNGEKIG
QGKANATTWLKENPATAKEIEKRVRELLLSNQNATPDFAVDDS--EGVAETNEDF--
>Salmonella_enterica_subsp._enterica_serovar_Bareilly_str._CFSAN001112_chromosome__complete_genome
MAIDENKQKALAAALGQIEKQFGKGSIMRLGEDRSMDVETISTGSLSLDIALGAGGLPMG
RIVEIYGPESSGKTTLTLQVIAAAQREGKTCAFIDAEHALDPVYARKLGVDIDNLLCSQP
DTGEQALEICDALARSGAVDVIVVDSVAALTPKAEIEGEIGDSHMGLAARMMSQAMRKLA
GNLKQSNTLLIFINQIRMKIGVMFGNPETTTGGNALKFYASVRLDIRRIGAVKEGDNVVG
SETRVKVVKNKIAAPFKQAEFQILYGEGINFYGELVDLGVKEKLIEKAGAWYSYNGEKIG
QGKANATTWLKENPATAKEIEKRVRELLLSNQNATPDFAVDDS--EGVAETNEDF--
>Salmonella_enterica_subsp._enterica_serovar_Enteritidis_str._EC20110356__complete_genome
MAIDENKQKALAAALGQIEKQFGKGSIMRLGEDRSMDVETISTGSLSLDIALGAGGLPMG
RIVEIYGPESSGKTTLTLQVIAAAQREGKTCAFIDAEHALDPVYARKLGVDIDNLLCSQP
DTGEQALEICDALARSGAVDVIVVDSVAALTPKAEIEGEIGDSHMGLAARMMSQAMRKLA
GNLKQSNTLLIFINQIRMKIGVMFGNPETTTGGNALKFYASVRLDIRRIGAVKEGDNVVG
SETRVKVVKNKIAAPFKQAEFQILYGEGINFYGELVDLGVKEKLIEKAGAWYSYNGEKIG
QGKANATTWLKENPATAKEIEKRVRELLLSNQNATPDFAVDDS--EGVAETNEDF--
>Salmonella_enterica_subsp._enterica_serovar_Newport_strain_CFSAN003890__complete_genome
MAIDENKQKALAAALGQIEKQFGKGSIMRLGEDRSMDVETISTGSLSLDIALGAGGLPMG
RIVEIYGPESSGKTTLTLQVIAAAQREGKTCAFIDAEHALDPVYARKLGVDIDNLLCSQP
DTGEQALEICDALARSGAVDVIVVDSVAALTPKAEIEGEIGDSHMGLAARMMSQAMRKLA
GNLKQSNTLLIFINQIRMKIGVMFGNPETTTGGNALKFYASVRLDIRRIGAVKEGDNVVG
SETRVKVVKNKIAAPFKQAEFQILYGEGINFYGELVDLGVKEKLIEKAGAWYSYNGEKIG
QGKANATTWLKENPATAKEIEKRVRELLLSNQNATPDFAVDDS--EGVAETNEDF--
>Salmonella_enterica_subsp._enterica_serovar_Enteritidis_strain_SEE1__complete_genome
MAIDENKQKALAAALGQIEKQFGKGSIMRLGEDRSMDVETISTGSLSLDIALGAGGLPMG
RIVEIYGPESSGKTTLTLQVIAAAQREGKTCAFIDAEHALDPVYARKLGVDIDNLLCSQP
DTGEQALEICDALARSGAVDVIVVDSVAALTPKAEIEGEIGDSHMGLAARMMSQAMRKLA
GNLKQSNTLLIFINQIRMKIGVMFGNPETTTGGNALKFYASVRLDIRRIGAVKEGDNVVG
SETRVKVVKNKIAAPFKQAEFQILYGEGINFYGELVDLGVKEKLIEKAGAWYSYNGEKIG
QGKANATTWLKENPATAKEIEKRVRELLLSNQNATPDFAVDDS--EGVAETNEDF--
>Salmonella_enterica_subsp._enterica_serovar_Agona_strain_USDA-ARS-USMARC-76341_chromosome__complete_genome
MAIDENKQKALAAALGQIEKQFGKGSIMRLGEDRSMDVETISTGSLSLDIALGAGGLPMG
RIVEIYGPESSGKTTLTLQVIAAAQREGKTCAFIDAEHALDPVYARKLGVDIDNLLCSQP
DTGEQALEICDALARSGAVDVIVVDSVAALTPKAEIEGEIGDSHMGLAARMMSQAMRKLA
GNLKQSNTLLIFINQIRMKIGVMFGNPETTTGGNALKFYASVRLDIRRIGAVKEGDNVVG
SETRVKVVKNKIAAPFKQAEFQILYGEGINFYGELVDLGVKEKLIEKAGAWYSYNGEKIG
QGKANATTWLKENPATAKEIEKRVRELLLSNQNATPDFAVDDS--EGVAETNEDF--
>Salmonella_enterica_subsp._enterica_serovar_Typhimurium_strain_81741_chromosome__complete_genome
MAIDENKQKALAAALGQIEKQFGKGSIMRLGEDRSMDVETISTGSLSLDIALGAGGLPMG
RIVEIYGPESSGKTTLTLQVIAAAQREGKTCAFIDAEHALDPVYARKLGVDIDNLLCSQP
DTGEQALEICDALARSGAVDVIVVDSVAALTPKAEIEGEIGDSHMGLAARMMSQAMRKLA
GNLKQSNTLLIFINQIRMKIGVMFGNPETTTGGNALKFYASVRLDIRRIGAVKEGDNVVG
SETRVKVVKNKIAAPFKQAEFQILYGEGINFYGELVDLGVKEKLIEKAGAWYSYNGEKIG
QGKANATTWLKENPATAKEIEKRVRELLLSNQNATPDFAVDDS--EGVAETNEDF--
>Salmonella_enterica_subsp._enterica_strain_SA972816_chromosome__complete_genome
MAIDENKQKALAAALGQIEKQFGKGSIMRLGEDRSMDVETISTGSLSLDIALGAGGLPMG
RIVEIYGPESSGKTTLTLQVIAAAQREGKTCAFIDAEHALDPVYARKLGVDIDNLLCSQP
DTGEQALEICDALARSGAVDVIVVDSVAALTPKAEIEGEIGDSHMGLAARMMSQAMRKLA
GNLKQSNTLLIFINQIRMKIGVMFGNPETTTGGNALKFYASVRLDIRRIGAVKEGDNVVG
SETRVKVVKNKIAAPFKQAEFQILYGEGINFYGELVDLGVKEKLIEKAGAWYSYNGEKIG
QGKANATTWLKENPATAKEIEKRVRELLLSNQNATPDFAVDDS--EGVAETNEDF--
>Salmonella_enterica_subsp._enterica_serovar_Saintpaul_strain_CFSAN004173_chromosome__complete_genome
MAIDENKQKALAAALGQIEKQFGKGSIMRLGEDRSMDVETISTGSLSLDIALGAGGLPMG
RIVEIYGPESSGKTTLTLQVIAAAQREGKTCAFIDAEHALDPVYARKLGVDIDNLLCSQP
DTGEQALEICDALARSGAVDVIVVDSVAALTPKAEIEGEIGDSHMGLAARMMSQAMRKLA
GNLKQSNTLLIFINQIRMKIGVMFGNPETTTGGNALKFYASVRLDIRRIGAVKEGDNVVG
SETRVKVVKNKIAAPFKQAEFQILYGEGINFYGELVDLGVKEKLIEKAGAWYSYNGEKIG
QGKANATTWLKENPATAKEIEKRVRELLLSNQNATPDFAVDDS--EGVAETNEDF--
>Salmonella_enterica_subsp._enterica_serovar_Abony_str._0014__complete_genome
MAIDENKQKALAAALGQIEKQFGKGSIMRLGEDRSMDVETISTGSLSLDIALGAGGLPMG
RIVEIYGPESSGKTTLTLQVIAAAQREGKTCAFIDAEHALDPVYARKLGVDIDNLLCSQP
DTGEQALEICDALARSGAVDVIVVDSVAALTPKAEIEGEIGDSHMGLAARMMSQAMRKLA
GNLKQSNTLLIFINQIRMKIGVMFGNPETTTGGNALKFYASVRLDIRRIGAVKEGDNVVG
SETRVKVVKNKIAAPFKQAEFQILYGEGINFYGELVDLGVKEKLIEKAGAWYSYNGEKIG
QGKANATTWLKENPATAKEIEKRVRELLLSNQNATPDFAVDDS--EGVAETNEDF--
>Salmonella_enterica_subsp._enterica_serovar_Saintpaul_strain_CFSAN004174_chromosome__complete_genome
MAIDENKQKALAAALGQIEKQFGKGSIMRLGEDRSMDVETISTGSLSLDIALGAGGLPMG
RIVEIYGPESSGKTTLTLQVIAAAQREGKTCAFIDAEHALDPVYARKLGVDIDNLLCSQP
DTGEQALEICDALARSGAVDVIVVDSVAALTPKAEIEGEIGDSHMGLAARMMSQAMRKLA
GNLKQSNTLLIFINQIRMKIGVMFGNPETTTGGNALKFYASVRLDIRRIGAVKEGDNVVG
SETRVKVVKNKIAAPFKQAEFQILYGEGINFYGELVDLGVKEKLIEKAGAWYSYNGEKIG
QGKANATTWLKENPATAKEIEKRVRELLLSNQNATPDFAVDDS--EGVAETNEDF--
>Salmonella_enterica_subsp._enterica_serovar_Newport_strain_CFSAN003387__complete_genome
MAIDENKQKALAAALGQIEKQFGKGSIMRLGEDRSMDVETISTGSLSLDIALGAGGLPMG
RIVEIYGPESSGKTTLTLQVIAAAQREGKTCAFIDAEHALDPVYARKLGVDIDNLLCSQP
DTGEQALEICDALARSGAVDVIVVDSVAALTPKAEIEGEIGDSHMGLAARMMSQAMRKLA
GNLKQSNTLLIFINQIRMKIGVMFGNPETTTGGNALKFYASVRLDIRRIGAVKEGDNVVG
SETRVKVVKNKIAAPFKQAEFQILYGEGINFYGELVDLGVKEKLIEKAGAWYSYNGEKIG
QGKANATTWLKENPATAKEIEKRVRELLLSNQNATPDFAVDDS--EGVAETNEDF--
>Salmonella_enterica_subsp._enterica_serovar_Typhi_strain_343078_211126_chromosome__complete_genome
MAIDENKQKALAAALGQIEKQFGKGSIMRLGEDRSMDVETISTGSLSLDIALGAGGLPMG
RIVEIYGPESSGKTTLTLQVIAAAQREGKTCAFIDAEHALDPVYARKLGVDIDNLLCSQP
DTGEQALEICDALARSGAVDVIVVDSVAALTPKAEIEGEIGDSHMGLAARMMSQAMRKLA
GNLKQSNTLLIFINQIRMKIGVMFGNPETTTGGNALKFYASVRLDIRRIGAVKEGDNVVG
SETRVKVVKNKIAAPFKQAEFQILYGEGINFYGELVDLGVKEKLIEKAGAWYSYNGEKIG
QGKANATTWLKENPATAKEIEKRVRELLLSNQNATPDFAVDDS--EGVAETNEDF--
>Salmonella_enterica_strain_C629_chromosome__complete_genome
MAIDENKQKALAAALGQIEKQFGKGSIMRLGEDRSMDVETISTGSLSLDIALGAGGLPMG
RIVEIYGPESSGKTTLTLQVIAAAQREGKTCAFIDAEHALDPVYARKLGVDIDNLLCSQP
DTGEQALEICDALARSGAVDVIVVDSVAALTPKAEIEGEIGDSHMGLAARMMSQAMRKLA
GNLKQSNTLLIFINQIRMKIGVMFGNPETTTGGNALKFYASVRLDIRRIGAVKEGDNVVG
SETRVKVVKNKIAAPFKQAEFQILYGEGINFYGELVDLGVKEKLIEKAGAWYSYNGEKIG
QGKANATTWLKENPATAKEIEKRVRELLLSNQNATPDFAVDDS--EGVAETNEDF--
>Salmonella_enterica_subsp._enterica_serovar_Typhimurium_strain_01ST04081_chromosome__complete_genome
MAIDENKQKALAAALGQIEKQFGKGSIMRLGEDRSMDVETISTGSLSLDIALGAGGLPMG
RIVEIYGPESSGKTTLTLQVIAAAQREGKTCAFIDAEHALDPVYARKLGVDIDNLLCSQP
DTGEQALEICDALARSGAVDVIVVDSVAALTPKAEIEGEIGDSHMGLAARMMSQAMRKLA
GNLKQSNTLLIFINQIRMKIGVMFGNPETTTGGNALKFYASVRLDIRRIGAVKEGDNVVG
SETRVKVVKNKIAAPFKQAEFQILYGEGINFYGELVDLGVKEKLIEKAGAWYSYNGEKIG
QGKANATTWLKENPATAKEIEKRVRELLLSNQNATPDFAVDDS--EGVAETNEDF--
>Salmonella_enterica_subsp._enterica_serovar_Enteritidis_strain_SJTUF12367v2_chromosome__complete_genome
MAIDENKQKALAAALGQIEKQFGKGSIMRLGEDRSMDVETISTGSLSLDIALGAGGLPMG
RIVEIYGPESSGKTTLTLQVIAAAQREGKTCAFIDAEHALDPVYARKLGVDIDNLLCSQP
DTGEQALEICDALARSGAVDVIVVDSVAALTPKAEIEGEIGDSHMGLAARMMSQAMRKLA
GNLKQSNTLLIFINQIRMKIGVMFGNPETTTGGNALKFYASVRLDIRRIGAVKEGDNVVG
SETRVKVVKNKIAAPFKQAEFQILYGEGINFYGELVDLGVKEKLIEKAGAWYSYNGEKIG
QGKANATTWLKENPATAKEIEKRVRELLLSNQNATPDFAVDDS--EGVAETNEDF--
>Salmonella_enterica_subsp._enterica_serovar_Senftenberg_strain_GTA-FD-2016-MI-02533-2_chromosome__complete_genome
MAIDENKQKALAAALGQIEKQFGKGSIMRLGEDRSMDVETISTGSLSLDIALGAGGLPMG
RIVEIYGPESSGKTTLTLQVIAAAQREGKTCAFIDAEHALDPVYARKLGVDIDNLLCSQP
DTGEQALEICDALARSGAVDVIVVDSVAALTPKAEIEGEIGDSHMGLAARMMSQAMRKLA
GNLKQSNTLLIFINQIRMKIGVMFGNPETTTGGNALKFYASVRLDIRRIGAVKEGDNVVG
SETRVKVVKNKIAAPFKQAEFQILYGEGINFYGELVDLGVKEKLIEKAGAWYSYNGEKIG
QGKANATTWLKENPATAKEIEKRVRELLLSNQNATPDFAVDDS--EGVAETNEDF--
>Salmonella_enterica_subsp._enterica_serovar_Enteritidis_str._EC20110360__complete_genome
MAIDENKQKALAAALGQIEKQFGKGSIMRLGEDRSMDVETISTGSLSLDIALGAGGLPMG
RIVEIYGPESSGKTTLTLQVIAAAQREGKTCAFIDAEHALDPVYARKLGVDIDNLLCSQP
DTGEQALEICDALARSGAVDVIVVDSVAALTPKAEIEGEIGDSHMGLAARMMSQAMRKLA
GNLKQSNTLLIFINQIRMKIGVMFGNPETTTGGNALKFYASVRLDIRRIGAVKEGDNVVG
SETRVKVVKNKIAAPFKQAEFQILYGEGINFYGELVDLGVKEKLIEKAGAWYSYNGEKIG
QGKANATTWLKENPATAKEIEKRVRELLLSNQNATPDFAVDDS--EGVAETNEDF--
>Salmonella_enterica_subsp._enterica_strain_1607_MR00001R_chromosome__complete_genome
MAIDENKQKALAAALGQIEKQFGKGSIMRLGEDRSMDVETISTGSLSLDIALGAGGLPMG
RIVEIYGPESSGKTTLTLQVIAAAQREGKTCAFIDAEHALDPVYARKLGVDIDNLLCSQP
DTGEQALEICDALARSGAVDVIVVDSVAALTPKAEIEGEIGDSHMGLAARMMSQAMRKLA
GNLKQSNTLLIFINQIRMKIGVMFGNPETTTGGNALKFYASVRLDIRRIGAVKEGDNVVG
SETRVKVVKNKIAAPFKQAEFQILYGEGINFYGELVDLGVKEKLIEKAGAWYSYNGEKIG
QGKANATTWLKENPATAKEIEKRVRELLLSNQNATPDFAVDDS--EGVAETNEDF--
>Salmonella_enterica_subsp._enterica_serovar_Enteritidis_strain_CMCC50041__complete_genome
MAIDENKQKALAAALGQIEKQFGKGSIMRLGEDRSMDVETISTGSLSLDIALGAGGLPMG
RIVEIYGPESSGKTTLTLQVIAAAQREGKTCAFIDAEHALDPVYARKLGVDIDNLLCSQP
DTGEQALEICDALARSGAVDVIVVDSVAALTPKAEIEGEIGDSHMGLAARMMSQAMRKLA
GNLKQSNTLLIFINQIRMKIGVMFGNPETTTGGNALKFYASVRLDIRRIGAVKEGDNVVG
SETRVKVVKNKIAAPFKQAEFQILYGEGINFYGELVDLGVKEKLIEKAGAWYSYNGEKIG
QGKANATTWLKENPATAKEIEKRVRELLLSNQNATPDFAVDDS--EGVAETNEDF--
>Salmonella_enterica_subsp._enterica_strain_10098816_chromosome__complete_genome
MAIDENKQKALAAALGQIEKQFGKGSIMRLGEDRSMDVETISTGSLSLDIALGAGGLPMG
RIVEIYGPESSGKTTLTLQVIAAAQREGKTCAFIDAEHALDPVYARKLGVDIDNLLCSQP
DTGEQALEICDALARSGAVDVIVVDSVAALTPKAEIEGEIGDSHMGLAARMMSQAMRKLA
GNLKQSNTLLIFINQIRMKIGVMFGNPETTTGGNALKFYASVRLDIRRIGAVKEGDNVVG
SETRVKVVKNKIAAPFKQAEFQILYGEGINFYGELVDLGVKEKLIEKAGAWYSYNGEKIG
QGKANATTWLKENPATAKEIEKRVRELLLSNQNATPDFAVDDS--EGVAETNEDF--
>Salmonella_enterica_subsp._enterica_serovar_Newport_str._CVM_21550__complete_genome
MAIDENKQKALAAALGQIEKQFGKGSIMRLGEDRSMDVETISTGSLSLDIALGAGGLPMG
RIVEIYGPESSGKTTLTLQVIAAAQREGKTCAFIDAEHALDPVYARKLGVDIDNLLCSQP
DTGEQALEICDALARSGAVDVIVVDSVAALTPKAEIEGEIGDSHMGLAARMMSQAMRKLA
GNLKQSNTLLIFINQIRMKIGVMFGNPETTTGGNALKFYASVRLDIRRIGAVKEGDNVVG
SETRVKVVKNKIAAPFKQAEFQILYGEGINFYGELVDLGVKEKLIEKAGAWYSYNGEKIG
QGKANATTWLKENPATAKEIEKRVRELLLSNQNATPDFAVDDS--EGVAETNEDF--
>Salmonella_enterica_subsp._enterica_serovar_Agona_strain_USDA-ARS-USMARC-76337_chromosome__complete_genome
MAIDENKQKALAAALGQIEKQFGKGSIMRLGEDRSMDVETISTGSLSLDIALGAGGLPMG
RIVEIYGPESSGKTTLTLQVIAAAQREGKTCAFIDAEHALDPVYARKLGVDIDNLLCSQP
DTGEQALEICDALARSGAVDVIVVDSVAALTPKAEIEGEIGDSHMGLAARMMSQAMRKLA
GNLKQSNTLLIFINQIRMKIGVMFGNPETTTGGNALKFYASVRLDIRRIGAVKEGDNVVG
SETRVKVVKNKIAAPFKQAEFQILYGEGINFYGELVDLGVKEKLIEKAGAWYSYNGEKIG
QGKANATTWLKENPATAKEIEKRVRELLLSNQNATPDFAVDDS--EGVAETNEDF--
>Salmonella_enterica_subsp._enterica_serovar_Typhi_strain_343077_228157_chromosome__complete_genome
MAIDENKQKALAAALGQIEKQFGKGSIMRLGEDRSMDVETISTGSLSLDIALGAGGLPMG
RIVEIYGPESSGKTTLTLQVIAAAQREGKTCAFIDAEHALDPVYARKLGVDIDNLLCSQP
DTGEQALEICDALARSGAVDVIVVDSVAALTPKAEIEGEIGDSHMGLAARMMSQAMRKLA
GNLKQSNTLLIFINQIRMKIGVMFGNPETTTGGNALKFYASVRLDIRRIGAVKEGDNVVG
SETRVKVVKNKIAAPFKQAEFQILYGEGINFYGELVDLGVKEKLIEKAGAWYSYNGEKIG
QGKANATTWLKENPATAKEIEKRVRELLLSNQNATPDFAVDDS--EGVAETNEDF--
>Salmonella_enterica_subsp._enterica_serovar_Infantis_strain_N55391__complete_genome
MAIDENKQKALAAALGQIEKQFGKGSIMRLGEDRSMDVETISTGSLSLDIALGAGGLPMG
RIVEIYGPESSGKTTLTLQVIAAAQREGKTCAFIDAEHALDPVYARKLGVDIDNLLCSQP
DTGEQALEICDALARSGAVDVIVVDSVAALTPKAEIEGEIGDSHMGLAARMMSQAMRKLA
GNLKQSNTLLIFINQIRMKIGVMFGNPETTTGGNALKFYASVRLDIRRIGAVKEGDNVVG
SETRVKVVKNKIAAPFKQAEFQILYGEGINFYGELVDLGVKEKLIEKAGAWYSYNGEKIG
QGKANATTWLKENPATAKEIEKRVRELLLSNQNATPDFAVDDS--EGVAETNEDF--
>Salmonella_enterica_subsp._enterica_serovar_Enteritidis_strain_FORC_007__complete_genome
MAIDENKQKALAAALGQIEKQFGKGSIMRLGEDRSMDVETISTGSLSLDIALGAGGLPMG
RIVEIYGPESSGKTTLTLQVIAAAQREGKTCAFIDAEHALDPVYARKLGVDIDNLLCSQP
DTGEQALEICDALARSGAVDVIVVDSVAALTPKAEIEGEIGDSHMGLAARMMSQAMRKLA
GNLKQSNTLLIFINQIRMKIGVMFGNPETTTGGNALKFYASVRLDIRRIGAVKEGDNVVG
SETRVKVVKNKIAAPFKQAEFQILYGEGINFYGELVDLGVKEKLIEKAGAWYSYNGEKIG
QGKANATTWLKENPATAKEIEKRVRELLLSNQNATPDFAVDDS--EGVAETNEDF--
>Salmonella_enterica_subsp._enterica_serovar_Stanleyville_strain_RSE10_chromosome__complete_genome
MAIDENKQKALAAALGQIEKQFGKGSIMRLGEDRSMDVETISTGSLSLDIALGAGGLPMG
RIVEIYGPESSGKTTLTLQVIAAAQREGKTCAFIDAEHALDPVYARKLGVDIDNLLCSQP
DTGEQALEICDALARSGAVDVIVVDSVAALTPKAEIEGEIGDSHMGLAARMMSQAMRKLA
GNLKQSNTLLIFINQIRMKIGVMFGNPETTTGGNALKFYASVRLDIRRIGAVKEGDNVVG
SETRVKVVKNKIAAPFKQAEFQILYGEGINFYGELVDLGVKEKLIEKAGAWYSYNGEKIG
QGKANATTWLKENPATAKEIEKRVRELLLSNQNATPDFAVDDS--EGVAETNEDF--
>Salmonella_enterica_subsp._enterica_serovar_Bareilly_str._CFSAN000700_chromosome__complete_genome
MAIDENKQKALAAALGQIEKQFGKGSIMRLGEDRSMDVETISTGSLSLDIALGAGGLPMG
RIVEIYGPESSGKTTLTLQVIAAAQREGKTCAFIDAEHALDPVYARKLGVDIDNLLCSQP
DTGEQALEICDALARSGAVDVIVVDSVAALTPKAEIEGEIGDSHMGLAARMMSQAMRKLA
GNLKQSNTLLIFINQIRMKIGVMFGNPETTTGGNALKFYASVRLDIRRIGAVKEGDNVVG
SETRVKVVKNKIAAPFKQAEFQILYGEGINFYGELVDLGVKEKLIEKAGAWYSYNGEKIG
QGKANATTWLKENPATAKEIEKRVRELLLSNQNATPDFAVDDS--EGVAETNEDF--
>Salmonella_enterica_subsp._enterica_strain_AR-0403_chromosome__complete_genome
MAIDENKQKALAAALGQIEKQFGKGSIMRLGEDRSMDVETISTGSLSLDIALGAGGLPMG
RIVEIYGPESSGKTTLTLQVIAAAQREGKTCAFIDAEHALDPVYARKLGVDIDNLLCSQP
DTGEQALEICDALARSGAVDVIVVDSVAALTPKAEIEGEIGDSHMGLAARMMSQAMRKLA
GNLKQSNTLLIFINQIRMKIGVMFGNPETTTGGNALKFYASVRLDIRRIGAVKEGDNVVG
SETRVKVVKNKIAAPFKQAEFQILYGEGINFYGELVDLGVKEKLIEKAGAWYSYNGEKIG
QGKANATTWLKENPATAKEIEKRVRELLLSNQNATPDFAVDDS--EGVAETNEDF--
>Salmonella_enterica_subsp._enterica_serovar_Typhi_str._P-stx-12__complete_genome
MAIDENKQKALAAALGQIEKQFGKGSIMRLGEDRSMDVETISTGSLSLDIALGAGGLPMG
RIVEIYGPESSGKTTLTLQVIAAAQREGKTCAFIDAEHALDPVYARKLGVDIDNLLCSQP
DTGEQALEICDALARSGAVDVIVVDSVAALTPKAEIEGEIGDSHMGLAARMMSQAMRKLA
GNLKQSNTLLIFINQIRMKIGVMFGNPETTTGGNALKFYASVRLDIRRIGAVKEGDNVVG
SETRVKVVKNKIAAPFKQAEFQILYGEGINFYGELVDLGVKEKLIEKAGAWYSYNGEKIG
QGKANATTWLKENPATAKEIEKRVRELLLSNQNATPDFAVDDS--EGVAETNEDF--
>Salmonella_enterica_subsp._enterica_serovar_Typhimurium_strain_BL10_chromosome__complete_genome
MAIDENKQKALAAALGQIEKQFGKGSIMRLGEDRSMDVETISTGSLSLDIALGAGGLPMG
RIVEIYGPESSGKTTLTLQVIAAAQREGKTCAFIDAEHALDPVYARKLGVDIDNLLCSQP
DTGEQALEICDALARSGAVDVIVVDSVAALTPKAEIEGEIGDSHMGLAARMMSQAMRKLA
GNLKQSNTLLIFINQIRMKIGVMFGNPETTTGGNALKFYASVRLDIRRIGAVKEGDNVVG
SETRVKVVKNKIAAPFKQAEFQILYGEGINFYGELVDLGVKEKLIEKAGAWYSYNGEKIG
QGKANATTWLKENPATAKEIEKRVRELLLSNQNATPDFAVDDS--EGVAETNEDF--
>Salmonella_enterica_subsp._enterica_serovar_Enteritidis_str._EC20110358__complete_genome
MAIDENKQKALAAALGQIEKQFGKGSIMRLGEDRSMDVETISTGSLSLDIALGAGGLPMG
RIVEIYGPESSGKTTLTLQVIAAAQREGKTCAFIDAEHALDPVYARKLGVDIDNLLCSQP
DTGEQALEICDALARSGAVDVIVVDSVAALTPKAEIEGEIGDSHMGLAARMMSQAMRKLA
GNLKQSNTLLIFINQIRMKIGVMFGNPETTTGGNALKFYASVRLDIRRIGAVKEGDNVVG
SETRVKVVKNKIAAPFKQAEFQILYGEGINFYGELVDLGVKEKLIEKAGAWYSYNGEKIG
QGKANATTWLKENPATAKEIEKRVRELLLSNQNATPDFAVDDS--EGVAETNEDF--
>Salmonella_enterica_subsp._enterica_strain_ID99315_chromosome__complete_genome
MAIDENKQKALAAALGQIEKQFGKGSIMRLGEDRSMDVETISTGSLSLDIALGAGGLPMG
RIVEIYGPESSGKTTLTLQVIAAAQREGKTCAFIDAEHALDPVYARKLGVDIDNLLCSQP
DTGEQALEICDALARSGAVDVIVVDSVAALTPKAEIEGEIGDSHMGLAARMMSQAMRKLA
GNLKQSNTLLIFINQIRMKIGVMFGNPETTTGGNALKFYASVRLDIRRIGAVKEGDNVVG
SETRVKVVKNKIAAPFKQAEFQILYGEGINFYGELVDLGVKEKLIEKAGAWYSYNGEKIG
QGKANATTWLKENPATAKEIEKRVRELLLSNQNATPDFAVDDS--EGVAETNEDF--
>Salmonella_enterica_subsp._enterica_strain_AR-0402_chromosome__complete_genome
MAIDENKQKALAAALGQIEKQFGKGSIMRLGEDRSMDVETISTGSLSLDIALGAGGLPMG
RIVEIYGPESSGKTTLTLQVIAAAQREGKTCAFIDAEHALDPVYARKLGVDIDNLLCSQP
DTGEQALEICDALARSGAVDVIVVDSVAALTPKAEIEGEIGDSHMGLAARMMSQAMRKLA
GNLKQSNTLLIFINQIRMKIGVMFGNPETTTGGNALKFYASVRLDIRRIGAVKEGDNVVG
SETRVKVVKNKIAAPFKQAEFQILYGEGINFYGELVDLGVKEKLIEKAGAWYSYNGEKIG
QGKANATTWLKENPATAKEIEKRVRELLLSNQNATPDFAVDDS--EGVAETNEDF--
>Salmonella_enterica_subsp._enterica_serovar_Virchow_strain_FORC_080_chromosome__complete_genome
MAIDENKQKALAAALGQIEKQFGKGSIMRLGEDRSMDVETISTGSLSLDIALGAGGLPMG
RIVEIYGPESSGKTTLTLQVIAAAQREGKTCAFIDAEHALDPVYARKLGVDIDNLLCSQP
DTGEQALEICDALARSGAVDVIVVDSVAALTPKAEIEGEIGDSHMGLAARMMSQAMRKLA
GNLKQSNTLLIFINQIRMKIGVMFGNPETTTGGNALKFYASVRLDIRRIGAVKEGDNVVG
SETRVKVVKNKIAAPFKQAEFQILYGEGINFYGELVDLGVKEKLIEKAGAWYSYNGEKIG
QGKANATTWLKENPATAKEIEKRVRELLLSNQNATPDFAVDDS--EGVAETNEDF--
>Salmonella_enterica_subsp._enterica_serovar_Typhi_strain_343078_273110_chromosome__complete_genome
MAIDENKQKALAAALGQIEKQFGKGSIMRLGEDRSMDVETISTGSLSLDIALGAGGLPMG
RIVEIYGPESSGKTTLTLQVIAAAQREGKTCAFIDAEHALDPVYARKLGVDIDNLLCSQP
DTGEQALEICDALARSGAVDVIVVDSVAALTPKAEIEGEIGDSHMGLAARMMSQAMRKLA
GNLKQSNTLLIFINQIRMKIGVMFGNPETTTGGNALKFYASVRLDIRRIGAVKEGDNVVG
SETRVKVVKNKIAAPFKQAEFQILYGEGINFYGELVDLGVKEKLIEKAGAWYSYNGEKIG
QGKANATTWLKENPATAKEIEKRVRELLLSNQNATPDFAVDDS--EGVAETNEDF--
>Salmonella_enterica_subsp._enterica_serovar_Berta_strain_SA20141895_chromosome__complete_genome
MAIDENKQKALAAALGQIEKQFGKGSIMRLGEDRSMDVETISTGSLSLDIALGAGGLPMG
RIVEIYGPESSGKTTLTLQVIAAAQREGKTCAFIDAEHALDPVYARKLGVDIDNLLCSQP
DTGEQALEICDALARSGAVDVIVVDSVAALTPKAEIEGEIGDSHMGLAARMMSQAMRKLA
GNLKQSNTLLIFINQIRMKIGVMFGNPETTTGGNALKFYASVRLDIRRIGAVKEGDNVVG
SETRVKVVKNKIAAPFKQAEFQILYGEGINFYGELVDLGVKEKLIEKAGAWYSYNGEKIG
QGKANATTWLKENPATAKEIEKRVRELLLSNQNATPDFAVDDS--EGVAETNEDF--
>Salmonella_enterica_subsp._enterica_strain_85775617_chromosome__complete_genome
MAIDENKQKALAAALGQIEKQFGKGSIMRLGEDRSMDVETISTGSLSLDIALGAGGLPMG
RIVEIYGPESSGKTTLTLQVIAAAQREGKTCAFIDAEHALDPVYARKLGVDIDNLLCSQP
DTGEQALEICDALARSGAVDVIVVDSVAALTPKAEIEGEIGDSHMGLAARMMSQAMRKLA
GNLKQSNTLLIFINQIRMKIGVMFGNPETTTGGNALKFYASVRLDIRRIGAVKEGDNVVG
SETRVKVVKNKIAAPFKQAEFQILYGEGINFYGELVDLGVKEKLIEKAGAWYSYNGEKIG
QGKANATTWLKENPATAKEIEKRVRELLLSNQNATPDFAVDDS--EGVAETNEDF--
>Salmonella_enterica_subsp._enterica_serovar_Newport_str._WA_14882__complete_genome
MAIDENKQKALAAALGQIEKQFGKGSIMRLGEDRSMDVETISTGSLSLDIALGAGGLPMG
RIVEIYGPESSGKTTLTLQVIAAAQREGKTCAFIDAEHALDPVYARKLGVDIDNLLCSQP
DTGEQALEICDALARSGAVDVIVVDSVAALTPKAEIEGEIGDSHMGLAARMMSQAMRKLA
GNLKQSNTLLIFINQIRMKIGVMFGNPETTTGGNALKFYASVRLDIRRIGAVKEGDNVVG
SETRVKVVKNKIAAPFKQAEFQILYGEGINFYGELVDLGVKEKLIEKAGAWYSYNGEKIG
QGKANATTWLKENPATAKEIEKRVRELLLSNQNATPDFAVDDS--EGVAETNEDF--
>Salmonella_enterica_subsp._enterica_serovar_Enteritidis_str._EC20100101__complete_genome
MAIDENKQKALAAALGQIEKQFGKGSIMRLGEDRSMDVETISTGSLSLDIALGAGGLPMG
RIVEIYGPESSGKTTLTLQVIAAAQREGKTCAFIDAEHALDPVYARKLGVDIDNLLCSQP
DTGEQALEICDALARSGAVDVIVVDSVAALTPKAEIEGEIGDSHMGLAARMMSQAMRKLA
GNLKQSNTLLIFINQIRMKIGVMFGNPETTTGGNALKFYASVRLDIRRIGAVKEGDNVVG
SETRVKVVKNKIAAPFKQAEFQILYGEGINFYGELVDLGVKEKLIEKAGAWYSYNGEKIG
QGKANATTWLKENPATAKEIEKRVRELLLSNQNATPDFAVDDS--EGVAETNEDF--
>Salmonella_enterica_subsp._enterica_serovar_Napoli_strain_LC0541
MAIDENKQKALAAALGQIEKQFGKGSIMRLGEDRSMDVETISTGSLSLDIALGAGGLPMG
RIVEIYGPESSGKTTLTLQVIAAAQREGKTCAFIDAEHALDPVYARKLGVDIDNLLCSQP
DTGEQALEICDALARSGAVDVIVVDSVAALTPKAEIEGEIGDSHMGLAARMMSQAMRKLA
GNLKQSNTLLIFINQIRMKIGVMFGNPETTTGGNALKFYASVRLDIRRIGAVKEGDNVVG
SETRVKVVKNKIAAPFKQAEFQILYGEGINFYGELVDLGVKEKLIEKAGAWYSYNGEKIG
QGKANATTWLKENPATAKEIEKRVRELLLSNQNATPDFAVDDS--EGVAETNEDF--
>Salmonella_enterica_subsp._enterica_serovar_Agona_strain_USDA-ARS-USMARC-76332_chromosome__complete_genome
MAIDENKQKALAAALGQIEKQFGKGSIMRLGEDRSMDVETISTGSLSLDIALGAGGLPMG
RIVEIYGPESSGKTTLTLQVIAAAQREGKTCAFIDAEHALDPVYARKLGVDIDNLLCSQP
DTGEQALEICDALARSGAVDVIVVDSVAALTPKAEIEGEIGDSHMGLAARMMSQAMRKLA
GNLKQSNTLLIFINQIRMKIGVMFGNPETTTGGNALKFYASVRLDIRRIGAVKEGDNVVG
SETRVKVVKNKIAAPFKQAEFQILYGEGINFYGELVDLGVKEKLIEKAGAWYSYNGEKIG
QGKANATTWLKENPATAKEIEKRVRELLLSNQNATPDFAVDDS--EGVAETNEDF--
>Salmonella_enterica_subsp._enterica_serovar_Bareilly_str._CFSAN000661_chromosome__complete_genome
MAIDENKQKALAAALGQIEKQFGKGSIMRLGEDRSMDVETISTGSLSLDIALGAGGLPMG
RIVEIYGPESSGKTTLTLQVIAAAQREGKTCAFIDAEHALDPVYARKLGVDIDNLLCSQP
DTGEQALEICDALARSGAVDVIVVDSVAALTPKAEIEGEIGDSHMGLAARMMSQAMRKLA
GNLKQSNTLLIFINQIRMKIGVMFGNPETTTGGNALKFYASVRLDIRRIGAVKEGDNVVG
SETRVKVVKNKIAAPFKQAEFQILYGEGINFYGELVDLGVKEKLIEKAGAWYSYNGEKIG
QGKANATTWLKENPATAKEIEKRVRELLLSNQNATPDFAVDDS--EGVAETNEDF--
>Salmonella_enterica_subsp._enterica_serovar_Heidelberg_strain_SA02DT09004001_chromosome__complete_genome
MAIDENKQKALAAALGQIEKQFGKGSIMRLGEDRSMDVETISTGSLSLDIALGAGGLPMG
RIVEIYGPESSGKTTLTLQVIAAAQREGKTCAFIDAEHALDPVYARKLGVDIDNLLCSQP
DTGEQALEICDALARSGAVDVIVVDSVAALTPKAEIEGEIGDSHMGLAARMMSQAMRKLA
GNLKQSNTLLIFINQIRMKIGVMFGNPETTTGGNALKFYASVRLDIRRIGAVKEGDNVVG
SETRVKVVKNKIAAPFKQAEFQILYGEGINFYGELVDLGVKEKLIEKAGAWYSYNGEKIG
QGKANATTWLKENPATAKEIEKRVRELLLSNQNATPDFAVDDS--EGVAETNEDF--
>Salmonella_enterica_subsp._enterica_serovar_Enteritidis_str._EC20110355__complete_genome
MAIDENKQKALAAALGQIEKQFGKGSIMRLGEDRSMDVETISTGSLSLDIALGAGGLPMG
RIVEIYGPESSGKTTLTLQVIAAAQREGKTCAFIDAEHALDPVYARKLGVDIDNLLCSQP
DTGEQALEICDALARSGAVDVIVVDSVAALTPKAEIEGEIGDSHMGLAARMMSQAMRKLA
GNLKQSNTLLIFINQIRMKIGVMFGNPETTTGGNALKFYASVRLDIRRIGAVKEGDNVVG
SETRVKVVKNKIAAPFKQAEFQILYGEGINFYGELVDLGVKEKLIEKAGAWYSYNGEKIG
QGKANATTWLKENPATAKEIEKRVRELLLSNQNATPDFAVDDS--EGVAETNEDF--
>Salmonella_enterica_subsp._enterica_serovar_Anatum_strain_CFSAN003959_chromosome__complete_genome
MAIDENKQKALAAALGQIEKQFGKGSIMRLGEDRSMDVETISTGSLSLDIALGAGGLPMG
RIVEIYGPESSGKTTLTLQVIAAAQREGKTCAFIDAEHALDPVYARKLGVDIDNLLCSQP
DTGEQALEICDALARSGAVDVIVVDSVAALTPKAEIEGEIGDSHMGLAARMMSQAMRKLA
GNLKQSNTLLIFINQIRMKIGVMFGNPETTTGGNALKFYASVRLDIRRIGAVKEGDNVVG
SETRVKVVKNKIAAPFKQAEFQILYGEGINFYGELVDLGVKEKLIEKAGAWYSYNGEKIG
QGKANATTWLKENPATAKEIEKRVRELLLSNQNATPDFAVDDS--EGVAETNEDF--
>Salmonella_enterica_subsp._enterica_serovar_Enteritidis_str._EC20111175__complete_genome
MAIDENKQKALAAALGQIEKQFGKGSIMRLGEDRSMDVETISTGSLSLDIALGAGGLPMG
RIVEIYGPESSGKTTLTLQVIAAAQREGKTCAFIDAEHALDPVYARKLGVDIDNLLCSQP
DTGEQALEICDALARSGAVDVIVVDSVAALTPKAEIEGEIGDSHMGLAARMMSQAMRKLA
GNLKQSNTLLIFINQIRMKIGVMFGNPETTTGGNALKFYASVRLDIRRIGAVKEGDNVVG
SETRVKVVKNKIAAPFKQAEFQILYGEGINFYGELVDLGVKEKLIEKAGAWYSYNGEKIG
QGKANATTWLKENPATAKEIEKRVRELLLSNQNATPDFAVDDS--EGVAETNEDF--
>Salmonella_enterica_subsp._enterica_serovar_Typhi_strain_343076_252143_chromosome__complete_genome
MAIDENKQKALAAALGQIEKQFGKGSIMRLGEDRSMDVETISTGSLSLDIALGAGGLPMG
RIVEIYGPESSGKTTLTLQVIAAAQREGKTCAFIDAEHALDPVYARKLGVDIDNLLCSQP
DTGEQALEICDALARSGAVDVIVVDSVAALTPKAEIEGEIGDSHMGLAARMMSQAMRKLA
GNLKQSNTLLIFINQIRMKIGVMFGNPETTTGGNALKFYASVRLDIRRIGAVKEGDNVVG
SETRVKVVKNKIAAPFKQAEFQILYGEGINFYGELVDLGVKEKLIEKAGAWYSYNGEKIG
QGKANATTWLKENPATAKEIEKRVRELLLSNQNATPDFAVDDS--EGVAETNEDF--
>Salmonella_enterica_subsp._enterica_serovar_Infantis_strain_FSIS1502916__complete_genome
MAIDENKQKALAAALGQIEKQFGKGSIMRLGEDRSMDVETISTGSLSLDIALGAGGLPMG
RIVEIYGPESSGKTTLTLQVIAAAQREGKTCAFIDAEHALDPVYARKLGVDIDNLLCSQP
DTGEQALEICDALARSGAVDVIVVDSVAALTPKAEIEGEIGDSHMGLAARMMSQAMRKLA
GNLKQSNTLLIFINQIRMKIGVMFGNPETTTGGNALKFYASVRLDIRRIGAVKEGDNVVG
SETRVKVVKNKIAAPFKQAEFQILYGEGINFYGELVDLGVKEKLIEKAGAWYSYNGEKIG
QGKANATTWLKENPATAKEIEKRVRELLLSNQNATPDFAVDDS--EGVAETNEDF--
>Salmonella_enterica_subsp._enterica_serovar_Heidelberg_str._SL476__complete_genome
MAIDENKQKALAAALGQIEKQFGKGSIMRLGEDRSMDVETISTGSLSLDIALGAGGLPMG
RIVEIYGPESSGKTTLTLQVIAAAQREGKTCAFIDAEHALDPVYARKLGVDIDNLLCSQP
DTGEQALEICDALARSGAVDVIVVDSVAALTPKAEIEGEIGDSHMGLAARMMSQAMRKLA
GNLKQSNTLLIFINQIRMKIGVMFGNPETTTGGNALKFYASVRLDIRRIGAVKEGDNVVG
SETRVKVVKNKIAAPFKQAEFQILYGEGINFYGELVDLGVKEKLIEKAGAWYSYNGEKIG
QGKANATTWLKENPATAKEIEKRVRELLLSNQNATPDFAVDDS--EGVAETNEDF--
>Salmonella_enterica_subsp._enterica_serovar_Typhimurium_strain_ATCC_14028_chromosome__complete_genome
MAIDENKQKALAAALGQIEKQFGKGSIMRLGEDRSMDVETISTGSLSLDIALGAGGLPMG
RIVEIYGPESSGKTTLTLQVIAAAQREGKTCAFIDAEHALDPVYARKLGVDIDNLLCSQP
DTGEQALEICDALARSGAVDVIVVDSVAALTPKAEIEGEIGDSHMGLAARMMSQAMRKLA
GNLKQSNTLLIFINQIRMKIGVMFGNPETTTGGNALKFYASVRLDIRRIGAVKEGDNVVG
SETRVKVVKNKIAAPFKQAEFQILYGEGINFYGELVDLGVKEKLIEKAGAWYSYNGEKIG
QGKANATTWLKENPATAKEIEKRVRELLLSNQNATPDFAVDDS--EGVAETNEDF--
>Salmonella_enterica_subsp._enterica_serovar_Indiana_strain_FJC33_chromosome__complete_genome
MAIDENKQKALAAALGQIEKQFGKGSIMRLGEDRSMDVETISTGSLSLDIALGAGGLPMG
RIVEIYGPESSGKTTLTLQVIAAAQREGKTCAFIDAEHALDPVYARKLGVDIDNLLCSQP
DTGEQALEICDALARSGAVDVIVVDSVAALTPKAEIEGEIGDSHMGLAARMMSQAMRKLA
GNLKQSNTLLIFINQIRMKIGVMFGNPETTTGGNALKFYASVRLDIRRIGAVKEGDNVVG
SETRVKVVKNKIAAPFKQAEFQILYGEGINFYGELVDLGVKEKLIEKAGAWYSYNGEKIG
QGKANATTWLKENPATAKEIEKRVRELLLSNQNATPDFAVDDS--EGVAETNEDF--
>Salmonella_enterica_subsp._enterica_serovar_Newport_strain_0112-791__complete_genome
MAIDENKQKALAAALGQIEKQFGKGSIMRLGEDRSMDVETISTGSLSLDIALGAGGLPMG
RIVEIYGPESSGKTTLTLQVIAAAQREGKTCAFIDAEHALDPVYARKLGVDIDNLLCSQP
DTGEQALEICDALARSGAVDVIVVDSVAALTPKAEIEGEIGDSHMGLAARMMSQAMRKLA
GNLKQSNTLLIFINQIRMKIGVMFGNPETTTGGNALKFYASVRLDIRRIGAVKEGDNVVG
SETRVKVVKNKIAAPFKQAEFQILYGEGINFYGELVDLGVKEKLIEKAGAWYSYNGEKIG
QGKANATTWLKENPATAKEIEKRVRELLLSNQNATPDFAVDDS--EGVAETNEDF--
>Salmonella_enterica_strain_ATCC_8387_chromosome__complete_genome
MAIDENKQKALAAALGQIEKQFGKGSIMRLGEDRSMDVETISTGSLSLDIALGAGGLPMG
RIVEIYGPESSGKTTLTLQVIAAAQREGKTCAFIDAEHALDPVYARKLGVDIDNLLCSQP
DTGEQALEICDALARSGAVDVIVVDSVAALTPKAEIEGEIGDSHMGLAARMMSQAMRKLA
GNLKQSNTLLIFINQIRMKIGVMFGNPETTTGGNALKFYASVRLDIRRIGAVKEGDNVVG
SETRVKVVKNKIAAPFKQAEFQILYGEGINFYGELVDLGVKEKLIEKAGAWYSYNGEKIG
QGKANATTWLKENPATAKEIEKRVRELLLSNQNATPDFAVDDS--EGVAETNEDF--
>Salmonella_enterica_subsp._enterica_serovar_Heidelberg_strain_A3ES40_chromosome__complete_genome
MAIDENKQKALAAALGQIEKQFGKGSIMRLGEDRSMDVETISTGSLSLDIALGAGGLPMG
RIVEIYGPESSGKTTLTLQVIAAAQREGKTCAFIDAEHALDPVYARKLGVDIDNLLCSQP
DTGEQALEICDALARSGAVDVIVVDSVAALTPKAEIEGEIGDSHMGLAARMMSQAMRKLA
GNLKQSNTLLIFINQIRMKIGVMFGNPETTTGGNALKFYASVRLDIRRIGAVKEGDNVVG
SETRVKVVKNKIAAPFKQAEFQILYGEGINFYGELVDLGVKEKLIEKAGAWYSYNGEKIG
QGKANATTWLKENPATAKEIEKRVRELLLSNQNATPDFAVDDS--EGVAETNEDF--
>Salmonella_enterica_subsp._enterica_serovar_Heidelberg_strain_AMR588-04-00435_chromosome__complete_genome
MAIDENKQKALAAALGQIEKQFGKGSIMRLGEDRSMDVETISTGSLSLDIALGAGGLPMG
RIVEIYGPESSGKTTLTLQVIAAAQREGKTCAFIDAEHALDPVYARKLGVDIDNLLCSQP
DTGEQALEICDALARSGAVDVIVVDSVAALTPKAEIEGEIGDSHMGLAARMMSQAMRKLA
GNLKQSNTLLIFINQIRMKIGVMFGNPETTTGGNALKFYASVRLDIRRIGAVKEGDNVVG
SETRVKVVKNKIAAPFKQAEFQILYGEGINFYGELVDLGVKEKLIEKAGAWYSYNGEKIG
QGKANATTWLKENPATAKEIEKRVRELLLSNQNATPDFAVDDS--EGVAETNEDF--
>Salmonella_enterica_strain_UFPRLABMOR1_chromosome__complete_genome
MAIDENKQKALAAALGQIEKQFGKGSIMRLGEDRSMDVETISTGSLSLDIALGAGGLPMG
RIVEIYGPESSGKTTLTLQVIAAAQREGKTCAFIDAEHALDPVYARKLGVDIDNLLCSQP
DTGEQALEICDALARSGAVDVIVVDSVAALTPKAEIEGEIGDSHMGLAARMMSQAMRKLA
GNLKQSNTLLIFINQIRMKIGVMFGNPETTTGGNALKFYASVRLDIRRIGAVKEGDNVVG
SETRVKVVKNKIAAPFKQAEFQILYGEGINFYGELVDLGVKEKLIEKAGAWYSYNGEKIG
QGKANATTWLKENPATAKEIEKRVRELLLSNQNATPDFAVDDS--EGVAETNEDF--
>Salmonella_enterica_subsp._enterica_serovar_Dublin_str._CT_02021853__complete_genome
MAIDENKQKALAAALGQIEKQFGKGSIMRLGEDRSMDVETISTGSLSLDIALGAGGLPMG
RIVEIYGPESSGKTTLTLQVIAAAQREGKTCAFIDAEHALDPVYARKLGVDIDNLLCSQP
DTGEQALEICDALARSGAVDVIVVDSVAALTPKAEIEGEIGDSHMGLAARMMSQAMRKLA
GNLKQSNTLLIFINQIRMKIGVMFGNPETTTGGNALKFYASVRLDIRRIGAVKEGDNVVG
SETRVKVVKNKIAAPFKQAEFQILYGEGINFYGELVDLGVKEKLIEKAGAWYSYNGEKIG
QGKANATTWLKENPATAKEIEKRVRELLLSNQNATPDFAVDDS--EGVAETNEDF--
>Salmonella_enterica_subsp._enterica_serovar_Enteritidis_str._EC20111095__complete_genome
MAIDENKQKALAAALGQIEKQFGKGSIMRLGEDRSMDVETISTGSLSLDIALGAGGLPMG
RIVEIYGPESSGKTTLTLQVIAAAQREGKTCAFIDAEHALDPVYARKLGVDIDNLLCSQP
DTGEQALEICDALARSGAVDVIVVDSVAALTPKAEIEGEIGDSHMGLAARMMSQAMRKLA
GNLKQSNTLLIFINQIRMKIGVMFGNPETTTGGNALKFYASVRLDIRRIGAVKEGDNVVG
SETRVKVVKNKIAAPFKQAEFQILYGEGINFYGELVDLGVKEKLIEKAGAWYSYNGEKIG
QGKANATTWLKENPATAKEIEKRVRELLLSNQNATPDFAVDDS--EGVAETNEDF--
>Salmonella_enterica_subsp._enterica_serovar_Newport_str._CVM_22425__complete_genome
MAIDENKQKALAAALGQIEKQFGKGSIMRLGEDRSMDVETISTGSLSLDIALGAGGLPMG
RIVEIYGPESSGKTTLTLQVIAAAQREGKTCAFIDAEHALDPVYARKLGVDIDNLLCSQP
DTGEQALEICDALARSGAVDVIVVDSVAALTPKAEIEGEIGDSHMGLAARMMSQAMRKLA
GNLKQSNTLLIFINQIRMKIGVMFGNPETTTGGNALKFYASVRLDIRRIGAVKEGDNVVG
SETRVKVVKNKIAAPFKQAEFQILYGEGINFYGELVDLGVKEKLIEKAGAWYSYNGEKIG
QGKANATTWLKENPATAKEIEKRVRELLLSNQNATPDFAVDDS--EGVAETNEDF--
>Salmonella_enterica_subsp._enterica_serovar_California_strain_CD-SL01_chromosome__complete_genome
MAIDENKQKALAAALGQIEKQFGKGSIMRLGEDRSMDVETISTGSLSLDIALGAGGLPMG
RIVEIYGPESSGKTTLTLQVIAAAQREGKTCAFIDAEHALDPVYARKLGVDIDNLLCSQP
DTGEQALEICDALARSGAVDVIVVDSVAALTPKAEIEGEIGDSHMGLAARMMSQAMRKLA
GNLKQSNTLLIFINQIRMKIGVMFGNPETTTGGNALKFYASVRLDIRRIGAVKEGDNVVG
SETRVKVVKNKIAAPFKQAEFQILYGEGINFYGELVDLGVKEKLIEKAGAWYSYNGEKIG
QGKANATTWLKENPATAKEIEKRVRELLLSNQNATPDFAVDDS--EGVAETNEDF--
>Salmonella_enterica_subsp._enterica_strain_ID106630_chromosome__complete_genome
MAIDENKQKALAAALGQIEKQFGKGSIMRLGEDRSMDVETISTGSLSLDIALGAGGLPMG
RIVEIYGPESSGKTTLTLQVIAAAQREGKTCAFIDAEHALDPVYARKLGVDIDNLLCSQP
DTGEQALEICDALARSGAVDVIVVDSVAALTPKAEIEGEIGDSHMGLAARMMSQAMRKLA
GNLKQSNTLLIFINQIRMKIGVMFGNPETTTGGNALKFYASVRLDIRRIGAVKEGDNVVG
SETRVKVVKNKIAAPFKQAEFQILYGEGINFYGELVDLGVKEKLIEKAGAWYSYNGEKIG
QGKANATTWLKENPATAKEIEKRVRELLLSNQNATPDFAVDDS--EGVAETNEDF--
>Salmonella_enterica_subsp._enterica_serovar_Anatum_str._CDC_06-0532__complete_genome
MAIDENKQKALAAALGQIEKQFGKGSIMRLGEDRSMDVETISTGSLSLDIALGAGGLPMG
RIVEIYGPESSGKTTLTLQVIAAAQREGKTCAFIDAEHALDPVYARKLGVDIDNLLCSQP
DTGEQALEICDALARSGAVDVIVVDSVAALTPKAEIEGEIGDSHMGLAARMMSQAMRKLA
GNLKQSNTLLIFINQIRMKIGVMFGNPETTTGGNALKFYASVRLDIRRIGAVKEGDNVVG
SETRVKVVKNKIAAPFKQAEFQILYGEGINFYGELVDLGVKEKLIEKAGAWYSYNGEKIG
QGKANATTWLKENPATAKEIEKRVRELLLSNQNATPDFAVDDS--EGVAETNEDF--
>Salmonella_enterica_subsp._enterica_serovar_Heidelberg_str._SARA35__complete_genome
MAIDENKQKALAAALGQIEKQFGKGSIMRLGEDRSMDVETISTGSLSLDIALGAGGLPMG
RIVEIYGPESSGKTTLTLQVIAAAQREGKTCAFIDAEHALDPVYARKLGVDIDNLLCSQP
DTGEQALEICDALARSGAVDVIVVDSVAALTPKAEIEGEIGDSHMGLAARMMSQAMRKLA
GNLKQSNTLLIFINQIRMKIGVMFGNPETTTGGNALKFYASVRLDIRRIGAVKEGDNVVG
SETRVKVVKNKIAAPFKQAEFQILYGEGINFYGELVDLGVKEKLIEKAGAWYSYNGEKIG
QGKANATTWLKENPATAKEIEKRVRELLLSNQNATPDFAVDDS--EGVAETNEDF--
>Salmonella_enterica_subsp._enterica_serovar_Thompson_str._RM6836__complete_genome
MAIDENKQKALAAALGQIEKQFGKGSIMRLGEDRSMDVETISTGSLSLDIALGAGGLPMG
RIVEIYGPESSGKTTLTLQVIAAAQREGKTCAFIDAEHALDPVYARKLGVDIDNLLCSQP
DTGEQALEICDALARSGAVDVIVVDSVAALTPKAEIEGEIGDSHMGLAARMMSQAMRKLA
GNLKQSNTLLIFINQIRMKIGVMFGNPETTTGGNALKFYASVRLDIRRIGAVKEGDNVVG
SETRVKVVKNKIAAPFKQAEFQILYGEGINFYGELVDLGVKEKLIEKAGAWYSYNGEKIG
QGKANATTWLKENPATAKEIEKRVRELLLSNQNATPDFAVDDS--EGVAETNEDF--
>Salmonella_enterica_subsp._enterica_serovar_Senftenberg_str._CFSAN004025_chromosome__complete_genome
MAIDENKQKALAAALGQIEKQFGKGSIMRLGEDRSMDVETISTGSLSLDIALGAGGLPMG
RIVEIYGPESSGKTTLTLQVIAAAQREGKTCAFIDAEHALDPVYARKLGVDIDNLLCSQP
DTGEQALEICDALARSGAVDVIVVDSVAALTPKAEIEGEIGDSHMGLAARMMSQAMRKLA
GNLKQSNTLLIFINQIRMKIGVMFGNPETTTGGNALKFYASVRLDIRRIGAVKEGDNVVG
SETRVKVVKNKIAAPFKQAEFQILYGEGINFYGELVDLGVKEKLIEKAGAWYSYNGEKIG
QGKANATTWLKENPATAKEIEKRVRELLLSNQNATPDFAVDDS--EGVAETNEDF--
>Salmonella_enterica_subsp._enterica_serovar_Typhi_strain_343077_215174_chromosome__complete_genome
MAIDENKQKALAAALGQIEKQFGKGSIMRLGEDRSMDVETISTGSLSLDIALGAGGLPMG
RIVEIYGPESSGKTTLTLQVIAAAQREGKTCAFIDAEHALDPVYARKLGVDIDNLLCSQP
DTGEQALEICDALARSGAVDVIVVDSVAALTPKAEIEGEIGDSHMGLAARMMSQAMRKLA
GNLKQSNTLLIFINQIRMKIGVMFGNPETTTGGNALKFYASVRLDIRRIGAVKEGDNVVG
SETRVKVVKNKIAAPFKQAEFQILYGEGINFYGELVDLGVKEKLIEKAGAWYSYNGEKIG
QGKANATTWLKENPATAKEIEKRVRELLLSNQNATPDFAVDDS--EGVAETNEDF--
>Salmonella_enterica_subsp._enterica_serovar_Montevideo_str._USDA-ARS-USMARC-1900__complete_genome
MAIDENKQKALAAALGQIEKQFGKGSIMRLGEDRSMDVETISTGSLSLDIALGAGGLPMG
RIVEIYGPESSGKTTLTLQVIAAAQREGKTCAFIDAEHALDPVYARKLGVDIDNLLCSQP
DTGEQALEICDALARSGAVDVIVVDSVAALTPKAEIEGEIGDSHMGLAARMMSQAMRKLA
GNLKQSNTLLIFINQIRMKIGVMFGNPETTTGGNALKFYASVRLDIRRIGAVKEGDNVVG
SETRVKVVKNKIAAPFKQAEFQILYGEGINFYGELVDLGVKEKLIEKAGAWYSYNGEKIG
QGKANATTWLKENPATAKEIEKRVRELLLSNQNATPDFAVDDS--EGVAETNEDF--
>Salmonella_enterica_subsp._enterica_serovar_1_4_[5]_12_i_-_strain_SA20143792_chromosome__complete_genome
MAIDENKQKALAAALGQIEKQFGKGSIMRLGEDRSMDVETISTGSLSLDIALGAGGLPMG
RIVEIYGPESSGKTTLTLQVIAAAQREGKTCAFIDAEHALDPVYARKLGVDIDNLLCSQP
DTGEQALEICDALARSGAVDVIVVDSVAALTPKAEIEGEIGDSHMGLAARMMSQAMRKLA
GNLKQSNTLLIFINQIRMKIGVMFGNPETTTGGNALKFYASVRLDIRRIGAVKEGDNVVG
SETRVKVVKNKIAAPFKQAEFQILYGEGINFYGELVDLGVKEKLIEKAGAWYSYNGEKIG
QGKANATTWLKENPATAKEIEKRVRELLLSNQNATPDFAVDDS--EGVAETNEDF--
>Salmonella_enterica_strain_FORC_078_chromosome__complete_genome
MAIDENKQKALAAALGQIEKQFGKGSIMRLGEDRSMDVETISTGSLSLDIALGAGGLPMG
RIVEIYGPESSGKTTLTLQVIAAAQREGKTCAFIDAEHALDPVYARKLGVDIDNLLCSQP
DTGEQALEICDALARSGAVDVIVVDSVAALTPKAEIEGEIGDSHMGLAARMMSQAMRKLA
GNLKQSNTLLIFINQIRMKIGVMFGNPETTTGGNALKFYASVRLDIRRIGAVKEGDNVVG
SETRVKVVKNKIAAPFKQAEFQILYGEGINFYGELVDLGVKEKLIEKAGAWYSYNGEKIG
QGKANATTWLKENPATAKEIEKRVRELLLSNQNATPDFAVDDS--EGVAETNEDF--
>Salmonella_enterica_subsp._enterica_strain_12C0807994_chromosome__complete_genome
MAIDENKQKALAAALGQIEKQFGKGSIMRLGEDRSMDVETISTGSLSLDIALGAGGLPMG
RIVEIYGPESSGKTTLTLQVIAAAQREGKTCAFIDAEHALDPVYARKLGVDIDNLLCSQP
DTGEQALEICDALARSGAVDVIVVDSVAALTPKAEIEGEIGDSHMGLAARMMSQAMRKLA
GNLKQSNTLLIFINQIRMKIGVMFGNPETTTGGNALKFYASVRLDIRRIGAVKEGDNVVG
SETRVKVVKNKIAAPFKQAEFQILYGEGINFYGELVDLGVKEKLIEKAGAWYSYNGEKIG
QGKANATTWLKENPATAKEIEKRVRELLLSNQNATPDFAVDDS--EGVAETNEDF--
>Salmonella_enterica_subsp._enterica_serovar_Montevideo_str._USDA-ARS-USMARC-1904__complete_genome
MAIDENKQKALAAALGQIEKQFGKGSIMRLGEDRSMDVETISTGSLSLDIALGAGGLPMG
RIVEIYGPESSGKTTLTLQVIAAAQREGKTCAFIDAEHALDPVYARKLGVDIDNLLCSQP
DTGEQALEICDALARSGAVDVIVVDSVAALTPKAEIEGEIGDSHMGLAARMMSQAMRKLA
GNLKQSNTLLIFINQIRMKIGVMFGNPETTTGGNALKFYASVRLDIRRIGAVKEGDNVVG
SETRVKVVKNKIAAPFKQAEFQILYGEGINFYGELVDLGVKEKLIEKAGAWYSYNGEKIG
QGKANATTWLKENPATAKEIEKRVRELLLSNQNATPDFAVDDS--EGVAETNEDF--
>Salmonella_enterica_subsp._enterica_serovar_Heidelberg_strain_AMR588-04-00320_chromosome__complete_genome
MAIDENKQKALAAALGQIEKQFGKGSIMRLGEDRSMDVETISTGSLSLDIALGAGGLPMG
RIVEIYGPESSGKTTLTLQVIAAAQREGKTCAFIDAEHALDPVYARKLGVDIDNLLCSQP
DTGEQALEICDALARSGAVDVIVVDSVAALTPKAEIEGEIGDSHMGLAARMMSQAMRKLA
GNLKQSNTLLIFINQIRMKIGVMFGNPETTTGGNALKFYASVRLDIRRIGAVKEGDNVVG
SETRVKVVKNKIAAPFKQAEFQILYGEGINFYGELVDLGVKEKLIEKAGAWYSYNGEKIG
QGKANATTWLKENPATAKEIEKRVRELLLSNQNATPDFAVDDS--EGVAETNEDF--
>Salmonella_enterica_subsp._enterica_serovar_Brandenburg_strain_USDA-ARS-USMARC-60983_chromosome__complete_genome
MAIDENKQKALAAALGQIEKQFGKGSIMRLGEDRSMDVETISTGSLSLDIALGAGGLPMG
RIVEIYGPESSGKTTLTLQVIAAAQREGKTCAFIDAEHALDPVYARKLGVDIDNLLCSQP
DTGEQALEICDALARSGAVDVIVVDSVAALTPKAEIEGEIGDSHMGLAARMMSQAMRKLA
GNLKQSNTLLIFINQIRMKIGVMFGNPETTTGGNALKFYASVRLDIRRIGAVKEGDNVVG
SETRVKVVKNKIAAPFKQAEFQILYGEGINFYGELVDLGVKEKLIEKAGAWYSYNGEKIG
QGKANATTWLKENPATAKEIEKRVRELLLSNQNATPDFAVDDS--EGVAETNEDF--
>Salmonella_enterica_subsp._enterica_serovar_Typhimurium_strain_138736__complete_genome
MAIDENKQKALAAALGQIEKQFGKGSIMRLGEDRSMDVETISTGSLSLDIALGAGGLPMG
RIVEIYGPESSGKTTLTLQVIAAAQREGKTCAFIDAEHALDPVYARKLGVDIDNLLCSQP
DTGEQALEICDALARSGAVDVIVVDSVAALTPKAEIEGEIGDSHMGLAARMMSQAMRKLA
GNLKQSNTLLIFINQIRMKIGVMFGNPETTTGGNALKFYASVRLDIRRIGAVKEGDNVVG
SETRVKVVKNKIAAPFKQAEFQILYGEGINFYGELVDLGVKEKLIEKAGAWYSYNGEKIG
QGKANATTWLKENPATAKEIEKRVRELLLSNQNATPDFAVDDS--EGVAETNEDF--
>Salmonella_enterica_subsp._enterica_serovar_Heidelberg_strain_SH12-003_chromosome__complete_genome
MAIDENKQKALAAALGQIEKQFGKGSIMRLGEDRSMDVETISTGSLSLDIALGAGGLPMG
RIVEIYGPESSGKTTLTLQVIAAAQREGKTCAFIDAEHALDPVYARKLGVDIDNLLCSQP
DTGEQALEICDALARSGAVDVIVVDSVAALTPKAEIEGEIGDSHMGLAARMMSQAMRKLA
GNLKQSNTLLIFINQIRMKIGVMFGNPETTTGGNALKFYASVRLDIRRIGAVKEGDNVVG
SETRVKVVKNKIAAPFKQAEFQILYGEGINFYGELVDLGVKEKLIEKAGAWYSYNGEKIG
QGKANATTWLKENPATAKEIEKRVRELLLSNQNATPDFAVDDS--EGVAETNEDF--
>Salmonella_enterica_subsp._enterica_serovar_Enteritidis_str._SA20085285__complete_genome
MAIDENKQKALAAALGQIEKQFGKGSIMRLGEDRSMDVETISTGSLSLDIALGAGGLPMG
RIVEIYGPESSGKTTLTLQVIAAAQREGKTCAFIDAEHALDPVYARKLGVDIDNLLCSQP
DTGEQALEICDALARSGAVDVIVVDSVAALTPKAEIEGEIGDSHMGLAARMMSQAMRKLA
GNLKQSNTLLIFINQIRMKIGVMFGNPETTTGGNALKFYASVRLDIRRIGAVKEGDNVVG
SETRVKVVKNKIAAPFKQAEFQILYGEGINFYGELVDLGVKEKLIEKAGAWYSYNGEKIG
QGKANATTWLKENPATAKEIEKRVRELLLSNQNATPDFAVDDS--EGVAETNEDF--
>Salmonella_enterica_subsp._enterica_serovar_Typhi_strain_311189_252186_chromosome__complete_genome
MAIDENKQKALAAALGQIEKQFGKGSIMRLGEDRSMDVETISTGSLSLDIALGAGGLPMG
RIVEIYGPESSGKTTLTLQVIAAAQREGKTCAFIDAEHALDPVYARKLGVDIDNLLCSQP
DTGEQALEICDALARSGAVDVIVVDSVAALTPKAEIEGEIGDSHMGLAARMMSQAMRKLA
GNLKQSNTLLIFINQIRMKIGVMFGNPETTTGGNALKFYASVRLDIRRIGAVKEGDNVVG
SETRVKVVKNKIAAPFKQAEFQILYGEGINFYGELVDLGVKEKLIEKAGAWYSYNGEKIG
QGKANATTWLKENPATAKEIEKRVRELLLSNQNATPDFAVDDS--EGVAETNEDF--
>Salmonella_enterica_subsp._enterica_serovar_Typhi_strain_311189_224186_chromosome__complete_genome
MAIDENKQKALAAALGQIEKQFGKGSIMRLGEDRSMDVETISTGSLSLDIALGAGGLPMG
RIVEIYGPESSGKTTLTLQVIAAAQREGKTCAFIDAEHALDPVYARKLGVDIDNLLCSQP
DTGEQALEICDALARSGAVDVIVVDSVAALTPKAEIEGEIGDSHMGLAARMMSQAMRKLA
GNLKQSNTLLIFINQIRMKIGVMFGNPETTTGGNALKFYASVRLDIRRIGAVKEGDNVVG
SETRVKVVKNKIAAPFKQAEFQILYGEGINFYGELVDLGVKEKLIEKAGAWYSYNGEKIG
QGKANATTWLKENPATAKEIEKRVRELLLSNQNATPDFAVDDS--EGVAETNEDF--
>Salmonella_enterica_subsp._enterica_serovar_Heidelberg_strain_12-4374__complete_genome
MAIDENKQKALAAALGQIEKQFGKGSIMRLGEDRSMDVETISTGSLSLDIALGAGGLPMG
RIVEIYGPESSGKTTLTLQVIAAAQREGKTCAFIDAEHALDPVYARKLGVDIDNLLCSQP
DTGEQALEICDALARSGAVDVIVVDSVAALTPKAEIEGEIGDSHMGLAARMMSQAMRKLA
GNLKQSNTLLIFINQIRMKIGVMFGNPETTTGGNALKFYASVRLDIRRIGAVKEGDNVVG
SETRVKVVKNKIAAPFKQAEFQILYGEGINFYGELVDLGVKEKLIEKAGAWYSYNGEKIG
QGKANATTWLKENPATAKEIEKRVRELLLSNQNATPDFAVDDS--EGVAETNEDF--
>Salmonella_enterica_subsp._enterica_strain_CFSA244_chromosome__complete_genome
MAIDENKQKALAAALGQIEKQFGKGSIMRLGEDRSMDVETISTGSLSLDIALGAGGLPMG
RIVEIYGPESSGKTTLTLQVIAAAQREGKTCAFIDAEHALDPVYARKLGVDIDNLLCSQP
DTGEQALEICDALARSGAVDVIVVDSVAALTPKAEIEGEIGDSHMGLAARMMSQAMRKLA
GNLKQSNTLLIFINQIRMKIGVMFGNPETTTGGNALKFYASVRLDIRRIGAVKEGDNVVG
SETRVKVVKNKIAAPFKQAEFQILYGEGINFYGELVDLGVKEKLIEKAGAWYSYNGEKIG
QGKANATTWLKENPATAKEIEKRVRELLLSNQNATPDFAVDDS--EGVAETNEDF--
>Salmonella_enterica_subsp._enterica_serovar_Montevideo_str._531954_chromosome__complete_genome
MAIDENKQKALAAALGQIEKQFGKGSIMRLGEDRSMDVETISTGSLSLDIALGAGGLPMG
RIVEIYGPESSGKTTLTLQVIAAAQREGKTCAFIDAEHALDPVYARKLGVDIDNLLCSQP
DTGEQALEICDALARSGAVDVIVVDSVAALTPKAEIEGEIGDSHMGLAARMMSQAMRKLA
GNLKQSNTLLIFINQIRMKIGVMFGNPETTTGGNALKFYASVRLDIRRIGAVKEGDNVVG
SETRVKVVKNKIAAPFKQAEFQILYGEGINFYGELVDLGVKEKLIEKAGAWYSYNGEKIG
QGKANATTWLKENPATAKEIEKRVRELLLSNQNATPDFAVDDS--EGVAETNEDF--
>Salmonella_enterica_subsp._enterica_serovar_Bareilly_str._CFSAN000968_chromosome__complete_genome
MAIDENKQKALAAALGQIEKQFGKGSIMRLGEDRSMDVETISTGSLSLDIALGAGGLPMG
RIVEIYGPESSGKTTLTLQVIAAAQREGKTCAFIDAEHALDPVYARKLGVDIDNLLCSQP
DTGEQALEICDALARSGAVDVIVVDSVAALTPKAEIEGEIGDSHMGLAARMMSQAMRKLA
GNLKQSNTLLIFINQIRMKIGVMFGNPETTTGGNALKFYASVRLDIRRIGAVKEGDNVVG
SETRVKVVKNKIAAPFKQAEFQILYGEGINFYGELVDLGVKEKLIEKAGAWYSYNGEKIG
QGKANATTWLKENPATAKEIEKRVRELLLSNQNATPDFAVDDS--EGVAETNEDF--
>Salmonella_enterica_subsp._enterica_serovar_Heidelberg_strain_SH13-006_chromosome__complete_genome
MAIDENKQKALAAALGQIEKQFGKGSIMRLGEDRSMDVETISTGSLSLDIALGAGGLPMG
RIVEIYGPESSGKTTLTLQVIAAAQREGKTCAFIDAEHALDPVYARKLGVDIDNLLCSQP
DTGEQALEICDALARSGAVDVIVVDSVAALTPKAEIEGEIGDSHMGLAARMMSQAMRKLA
GNLKQSNTLLIFINQIRMKIGVMFGNPETTTGGNALKFYASVRLDIRRIGAVKEGDNVVG
SETRVKVVKNKIAAPFKQAEFQILYGEGINFYGELVDLGVKEKLIEKAGAWYSYNGEKIG
QGKANATTWLKENPATAKEIEKRVRELLLSNQNATPDFAVDDS--EGVAETNEDF--
>Salmonella_enterica_subsp._enterica_serovar_Bareilly_str._CFSAN000952_chromosome__complete_genome
MAIDENKQKALAAALGQIEKQFGKGSIMRLGEDRSMDVETISTGSLSLDIALGAGGLPMG
RIVEIYGPESSGKTTLTLQVIAAAQREGKTCAFIDAEHALDPVYARKLGVDIDNLLCSQP
DTGEQALEICDALARSGAVDVIVVDSVAALTPKAEIEGEIGDSHMGLAARMMSQAMRKLA
GNLKQSNTLLIFINQIRMKIGVMFGNPETTTGGNALKFYASVRLDIRRIGAVKEGDNVVG
SETRVKVVKNKIAAPFKQAEFQILYGEGINFYGELVDLGVKEKLIEKAGAWYSYNGEKIG
QGKANATTWLKENPATAKEIEKRVRELLLSNQNATPDFAVDDS--EGVAETNEDF--
>Salmonella_enterica_subsp._enterica_serovar_Typhimurium_strain_FORC098_chromosome__complete_genome
MAIDENKQKALAAALGQIEKQFGKGSIMRLGEDRSMDVETISTGSLSLDIALGAGGLPMG
RIVEIYGPESSGKTTLTLQVIAAAQREGKTCAFIDAEHALDPVYARKLGVDIDNLLCSQP
DTGEQALEICDALARSGAVDVIVVDSVAALTPKAEIEGEIGDSHMGLAARMMSQAMRKLA
GNLKQSNTLLIFINQIRMKIGVMFGNPETTTGGNALKFYASVRLDIRRIGAVKEGDNVVG
SETRVKVVKNKIAAPFKQAEFQILYGEGINFYGELVDLGVKEKLIEKAGAWYSYNGEKIG
QGKANATTWLKENPATAKEIEKRVRELLLSNQNATPDFAVDDS--EGVAETNEDF--
>Salmonella_enterica_subsp._enterica_serovar_Saintpaul_strain_5_isolate_CFSAN047351_chromosome__complete_genome
MAIDENKQKALAAALGQIEKQFGKGSIMRLGEDRSMDVETISTGSLSLDIALGAGGLPMG
RIVEIYGPESSGKTTLTLQVIAAAQREGKTCAFIDAEHALDPVYARKLGVDIDNLLCSQP
DTGEQALEICDALARSGAVDVIVVDSVAALTPKAEIEGEIGDSHMGLAARMMSQAMRKLA
GNLKQSNTLLIFINQIRMKIGVMFGNPETTTGGNALKFYASVRLDIRRIGAVKEGDNVVG
SETRVKVVKNKIAAPFKQAEFQILYGEGINFYGELVDLGVKEKLIEKAGAWYSYNGEKIG
QGKANATTWLKENPATAKEIEKRVRELLLSNQNATPDFAVDDS--EGVAETNEDF--
>Salmonella_enterica_subsp._enterica_serovar_Bareilly_str._CFSAN000951_chromosome__complete_genome
MAIDENKQKALAAALGQIEKQFGKGSIMRLGEDRSMDVETISTGSLSLDIALGAGGLPMG
RIVEIYGPESSGKTTLTLQVIAAAQREGKTCAFIDAEHALDPVYARKLGVDIDNLLCSQP
DTGEQALEICDALARSGAVDVIVVDSVAALTPKAEIEGEIGDSHMGLAARMMSQAMRKLA
GNLKQSNTLLIFINQIRMKIGVMFGNPETTTGGNALKFYASVRLDIRRIGAVKEGDNVVG
SETRVKVVKNKIAAPFKQAEFQILYGEGINFYGELVDLGVKEKLIEKAGAWYSYNGEKIG
QGKANATTWLKENPATAKEIEKRVRELLLSNQNATPDFAVDDS--EGVAETNEDF--
>Salmonella_enterica_subsp._enterica_serovar_Thompson_strain_RM1986__complete_genome
MAIDENKQKALAAALGQIEKQFGKGSIMRLGEDRSMDVETISTGSLSLDIALGAGGLPMG
RIVEIYGPESSGKTTLTLQVIAAAQREGKTCAFIDAEHALDPVYARKLGVDIDNLLCSQP
DTGEQALEICDALARSGAVDVIVVDSVAALTPKAEIEGEIGDSHMGLAARMMSQAMRKLA
GNLKQSNTLLIFINQIRMKIGVMFGNPETTTGGNALKFYASVRLDIRRIGAVKEGDNVVG
SETRVKVVKNKIAAPFKQAEFQILYGEGINFYGELVDLGVKEKLIEKAGAWYSYNGEKIG
QGKANATTWLKENPATAKEIEKRVRELLLSNQNATPDFAVDDS--EGVAETNEDF--
>Salmonella_enterica_subsp._enterica_serovar_Heidelberg_strain_CFSAN067218_chromosome__complete_genome
MAIDENKQKALAAALGQIEKQFGKGSIMRLGEDRSMDVETISTGSLSLDIALGAGGLPMG
RIVEIYGPESSGKTTLTLQVIAAAQREGKTCAFIDAEHALDPVYARKLGVDIDNLLCSQP
DTGEQALEICDALARSGAVDVIVVDSVAALTPKAEIEGEIGDSHMGLAARMMSQAMRKLA
GNLKQSNTLLIFINQIRMKIGVMFGNPETTTGGNALKFYASVRLDIRRIGAVKEGDNVVG
SETRVKVVKNKIAAPFKQAEFQILYGEGINFYGELVDLGVKEKLIEKAGAWYSYNGEKIG
QGKANATTWLKENPATAKEIEKRVRELLLSNQNATPDFAVDDS--EGVAETNEDF--
>Salmonella_enterica_subsp._enterica_strain_AR-0401_chromosome__complete_genome
MAIDENKQKALAAALGQIEKQFGKGSIMRLGEDRSMDVETISTGSLSLDIALGAGGLPMG
RIVEIYGPESSGKTTLTLQVIAAAQREGKTCAFIDAEHALDPVYARKLGVDIDNLLCSQP
DTGEQALEICDALARSGAVDVIVVDSVAALTPKAEIEGEIGDSHMGLAARMMSQAMRKLA
GNLKQSNTLLIFINQIRMKIGVMFGNPETTTGGNALKFYASVRLDIRRIGAVKEGDNVVG
SETRVKVVKNKIAAPFKQAEFQILYGEGINFYGELVDLGVKEKLIEKAGAWYSYNGEKIG
QGKANATTWLKENPATAKEIEKRVRELLLSNQNATPDFAVDDS--EGVAETNEDF--
>Salmonella_enterica_subsp._enterica_serovar_Senftenberg_strain_AR-0405_chromosome__complete_genome
MAIDENKQKALAAALGQIEKQFGKGSIMRLGEDRSMDVETISTGSLSLDIALGAGGLPMG
RIVEIYGPESSGKTTLTLQVIAAAQREGKTCAFIDAEHALDPVYARKLGVDIDNLLCSQP
DTGEQALEICDALARSGAVDVIVVDSVAALTPKAEIEGEIGDSHMGLAARMMSQAMRKLA
GNLKQSNTLLIFINQIRMKIGVMFGNPETTTGGNALKFYASVRLDIRRIGAVKEGDNVVG
SETRVKVVKNKIAAPFKQAEFQILYGEGINFYGELVDLGVKEKLIEKAGAWYSYNGEKIG
QGKANATTWLKENPATAKEIEKRVRELLLSNQNATPDFAVDDS--EGVAETNEDF--
>Salmonella_enterica_subsp._enterica_serovar_Heidelberg_strain_SA02DT10168701__complete_genome
MAIDENKQKALAAALGQIEKQFGKGSIMRLGEDRSMDVETISTGSLSLDIALGAGGLPMG
RIVEIYGPESSGKTTLTLQVIAAAQREGKTCAFIDAEHALDPVYARKLGVDIDNLLCSQP
DTGEQALEICDALARSGAVDVIVVDSVAALTPKAEIEGEIGDSHMGLAARMMSQAMRKLA
GNLKQSNTLLIFINQIRMKIGVMFGNPETTTGGNALKFYASVRLDIRRIGAVKEGDNVVG
SETRVKVVKNKIAAPFKQAEFQILYGEGINFYGELVDLGVKEKLIEKAGAWYSYNGEKIG
QGKANATTWLKENPATAKEIEKRVRELLLSNQNATPDFAVDDS--EGVAETNEDF--
>Salmonella_enterica_subsp._enterica_serovar_Enteritidis_str._SA20094352_complete_genome
MAIDENKQKALAAALGQIEKQFGKGSIMRLGEDRSMDVETISTGSLSLDIALGAGGLPMG
RIVEIYGPESSGKTTLTLQVIAAAQREGKTCAFIDAEHALDPVYARKLGVDIDNLLCSQP
DTGEQALEICDALARSGAVDVIVVDSVAALTPKAEIEGEIGDSHMGLAARMMSQAMRKLA
GNLKQSNTLLIFINQIRMKIGVMFGNPETTTGGNALKFYASVRLDIRRIGAVKEGDNVVG
SETRVKVVKNKIAAPFKQAEFQILYGEGINFYGELVDLGVKEKLIEKAGAWYSYNGEKIG
QGKANATTWLKENPATAKEIEKRVRELLLSNQNATPDFAVDDS--EGVAETNEDF--
>Salmonella_enterica_subsp._enterica_serovar_Typhi_strain_343076_202113_chromosome__complete_genome
MAIDENKQKALAAALGQIEKQFGKGSIMRLGEDRSMDVETISTGSLSLDIALGAGGLPMG
RIVEIYGPESSGKTTLTLQVIAAAQREGKTCAFIDAEHALDPVYARKLGVDIDNLLCSQP
DTGEQALEICDALARSGAVDVIVVDSVAALTPKAEIEGEIGDSHMGLAARMMSQAMRKLA
GNLKQSNTLLIFINQIRMKIGVMFGNPETTTGGNALKFYASVRLDIRRIGAVKEGDNVVG
SETRVKVVKNKIAAPFKQAEFQILYGEGINFYGELVDLGVKEKLIEKAGAWYSYNGEKIG
QGKANATTWLKENPATAKEIEKRVRELLLSNQNATPDFAVDDS--EGVAETNEDF--
>Salmonella_enterica_subsp._enterica_strain_ID135534_chromosome__complete_genome
MAIDENKQKALAAALGQIEKQFGKGSIMRLGEDRSMDVETISTGSLSLDIALGAGGLPMG
RIVEIYGPESSGKTTLTLQVIAAAQREGKTCAFIDAEHALDPVYARKLGVDIDNLLCSQP
DTGEQALEICDALARSGAVDVIVVDSVAALTPKAEIEGEIGDSHMGLAARMMSQAMRKLA
GNLKQSNTLLIFINQIRMKIGVMFGNPETTTGGNALKFYASVRLDIRRIGAVKEGDNVVG
SETRVKVVKNKIAAPFKQAEFQILYGEGINFYGELVDLGVKEKLIEKAGAWYSYNGEKIG
QGKANATTWLKENPATAKEIEKRVRELLLSNQNATPDFAVDDS--EGVAETNEDF--
>Salmonella_enterica_subsp._enterica_serovar_Bareilly_str._CFSAN000958_chromosome__complete_genome
MAIDENKQKALAAALGQIEKQFGKGSIMRLGEDRSMDVETISTGSLSLDIALGAGGLPMG
RIVEIYGPESSGKTTLTLQVIAAAQREGKTCAFIDAEHALDPVYARKLGVDIDNLLCSQP
DTGEQALEICDALARSGAVDVIVVDSVAALTPKAEIEGEIGDSHMGLAARMMSQAMRKLA
GNLKQSNTLLIFINQIRMKIGVMFGNPETTTGGNALKFYASVRLDIRRIGAVKEGDNVVG
SETRVKVVKNKIAAPFKQAEFQILYGEGINFYGELVDLGVKEKLIEKAGAWYSYNGEKIG
QGKANATTWLKENPATAKEIEKRVRELLLSNQNATPDFAVDDS--EGVAETNEDF--
>Salmonella_enterica_subsp._enterica_serovar_Newport_strain_SAP18-8729_chromosome__complete_genome
MAIDENKQKALAAALGQIEKQFGKGSIMRLGEDRSMDVETISTGSLSLDIALGAGGLPMG
RIVEIYGPESSGKTTLTLQVIAAAQREGKTCAFIDAEHALDPVYARKLGVDIDNLLCSQP
DTGEQALEICDALARSGAVDVIVVDSVAALTPKAEIEGEIGDSHMGLAARMMSQAMRKLA
GNLKQSNTLLIFINQIRMKIGVMFGNPETTTGGNALKFYASVRLDIRRIGAVKEGDNVVG
SETRVKVVKNKIAAPFKQAEFQILYGEGINFYGELVDLGVKEKLIEKAGAWYSYNGEKIG
QGKANATTWLKENPATAKEIEKRVRELLLSNQNATPDFAVDDS--EGVAETNEDF--
>Salmonella_enterica_subsp._enterica_serovar_Typhimurium_str._14028S_substr._GXS254_chromosome__complete_genome
MAIDENKQKALAAALGQIEKQFGKGSIMRLGEDRSMDVETISTGSLSLDIALGAGGLPMG
RIVEIYGPESSGKTTLTLQVIAAAQREGKTCAFIDAEHALDPVYARKLGVDIDNLLCSQP
DTGEQALEICDALARSGAVDVIVVDSVAALTPKAEIEGEIGDSHMGLAARMMSQAMRKLA
GNLKQSNTLLIFINQIRMKIGVMFGNPETTTGGNALKFYASVRLDIRRIGAVKEGDNVVG
SETRVKVVKNKIAAPFKQAEFQILYGEGINFYGELVDLGVKEKLIEKAGAWYSYNGEKIG
QGKANATTWLKENPATAKEIEKRVRELLLSNQNATPDFAVDDS--EGVAETNEDF--
>Salmonella_enterica_subsp._enterica_serovar_Bareilly_str._CFSAN000954_chromosome__complete_genome
MAIDENKQKALAAALGQIEKQFGKGSIMRLGEDRSMDVETISTGSLSLDIALGAGGLPMG
RIVEIYGPESSGKTTLTLQVIAAAQREGKTCAFIDAEHALDPVYARKLGVDIDNLLCSQP
DTGEQALEICDALARSGAVDVIVVDSVAALTPKAEIEGEIGDSHMGLAARMMSQAMRKLA
GNLKQSNTLLIFINQIRMKIGVMFGNPETTTGGNALKFYASVRLDIRRIGAVKEGDNVVG
SETRVKVVKNKIAAPFKQAEFQILYGEGINFYGELVDLGVKEKLIEKAGAWYSYNGEKIG
QGKANATTWLKENPATAKEIEKRVRELLLSNQNATPDFAVDDS--EGVAETNEDF--
>Salmonella_enterica_strain_FDAARGOS_768_chromosome__complete_genome
MAIDENKQKALAAALGQIEKQFGKGSIMRLGEDRSMDVETISTGSLSLDIALGAGGLPMG
RIVEIYGPESSGKTTLTLQVIAAAQREGKTCAFIDAEHALDPVYARKLGVDIDNLLCSQP
DTGEQALEICDALARSGAVDVIVVDSVAALTPKAEIEGEIGDSHMGLAARMMSQAMRKLA
GNLKQSNTLLIFINQIRMKIGVMFGNPETTTGGNALKFYASVRLDIRRIGAVKEGDNVVG
SETRVKVVKNKIAAPFKQAEFQILYGEGINFYGELVDLGVKEKLIEKAGAWYSYNGEKIG
QGKANATTWLKENPATAKEIEKRVRELLLSNQNATPDFAVDDS--EGVAETNEDF--
>Salmonella_enterica_subsp._enterica_strain_ID100303_chromosome__complete_genome
MAIDENKQKALAAALGQIEKQFGKGSIMRLGEDRSMDVETISTGSLSLDIALGAGGLPMG
RIVEIYGPESSGKTTLTLQVIAAAQREGKTCAFIDAEHALDPVYARKLGVDIDNLLCSQP
DTGEQALEICDALARSGAVDVIVVDSVAALTPKAEIEGEIGDSHMGLAARMMSQAMRKLA
GNLKQSNTLLIFINQIRMKIGVMFGNPETTTGGNALKFYASVRLDIRRIGAVKEGDNVVG
SETRVKVVKNKIAAPFKQAEFQILYGEGINFYGELVDLGVKEKLIEKAGAWYSYNGEKIG
QGKANATTWLKENPATAKEIEKRVRELLLSNQNATPDFAVDDS--EGVAETNEDF--
>Salmonella_enterica_subsp._enterica_serovar_Typhi_strain_311189_222186_chromosome__complete_genome
MAIDENKQKALAAALGQIEKQFGKGSIMRLGEDRSMDVETISTGSLSLDIALGAGGLPMG
RIVEIYGPESSGKTTLTLQVIAAAQREGKTCAFIDAEHALDPVYARKLGVDIDNLLCSQP
DTGEQALEICDALARSGAVDVIVVDSVAALTPKAEIEGEIGDSHMGLAARMMSQAMRKLA
GNLKQSNTLLIFINQIRMKIGVMFGNPETTTGGNALKFYASVRLDIRRIGAVKEGDNVVG
SETRVKVVKNKIAAPFKQAEFQILYGEGINFYGELVDLGVKEKLIEKAGAWYSYNGEKIG
QGKANATTWLKENPATAKEIEKRVRELLLSNQNATPDFAVDDS--EGVAETNEDF--
>Salmonella_enterica_subsp._enterica_serovar_Senftenberg_strain_GTA-FD-2016-MI-02533-3_chromosome__complete_genome
MAIDENKQKALAAALGQIEKQFGKGSIMRLGEDRSMDVETISTGSLSLDIALGAGGLPMG
RIVEIYGPESSGKTTLTLQVIAAAQREGKTCAFIDAEHALDPVYARKLGVDIDNLLCSQP
DTGEQALEICDALARSGAVDVIVVDSVAALTPKAEIEGEIGDSHMGLAARMMSQAMRKLA
GNLKQSNTLLIFINQIRMKIGVMFGNPETTTGGNALKFYASVRLDIRRIGAVKEGDNVVG
SETRVKVVKNKIAAPFKQAEFQILYGEGINFYGELVDLGVKEKLIEKAGAWYSYNGEKIG
QGKANATTWLKENPATAKEIEKRVRELLLSNQNATPDFAVDDS--EGVAETNEDF--
>Salmonella_enterica_subsp._enterica_serovar_Typhi_strain_343077_212159_chromosome__complete_genome
MAIDENKQKALAAALGQIEKQFGKGSIMRLGEDRSMDVETISTGSLSLDIALGAGGLPMG
RIVEIYGPESSGKTTLTLQVIAAAQREGKTCAFIDAEHALDPVYARKLGVDIDNLLCSQP
DTGEQALEICDALARSGAVDVIVVDSVAALTPKAEIEGEIGDSHMGLAARMMSQAMRKLA
GNLKQSNTLLIFINQIRMKIGVMFGNPETTTGGNALKFYASVRLDIRRIGAVKEGDNVVG
SETRVKVVKNKIAAPFKQAEFQILYGEGINFYGELVDLGVKEKLIEKAGAWYSYNGEKIG
QGKANATTWLKENPATAKEIEKRVRELLLSNQNATPDFAVDDS--EGVAETNEDF--
>Salmonella_enterica_subsp._enterica_serovar_Typhi_strain_311189_218186_chromosome__complete_genome
MAIDENKQKALAAALGQIEKQFGKGSIMRLGEDRSMDVETISTGSLSLDIALGAGGLPMG
RIVEIYGPESSGKTTLTLQVIAAAQREGKTCAFIDAEHALDPVYARKLGVDIDNLLCSQP
DTGEQALEICDALARSGAVDVIVVDSVAALTPKAEIEGEIGDSHMGLAARMMSQAMRKLA
GNLKQSNTLLIFINQIRMKIGVMFGNPETTTGGNALKFYASVRLDIRRIGAVKEGDNVVG
SETRVKVVKNKIAAPFKQAEFQILYGEGINFYGELVDLGVKEKLIEKAGAWYSYNGEKIG
QGKANATTWLKENPATAKEIEKRVRELLLSNQNATPDFAVDDS--EGVAETNEDF--
>Salmonella_enterica_subsp._enterica_serovar_Heidelberg_strain_09-036813-1A_chromosome__complete_genome
MAIDENKQKALAAALGQIEKQFGKGSIMRLGEDRSMDVETISTGSLSLDIALGAGGLPMG
RIVEIYGPESSGKTTLTLQVIAAAQREGKTCAFIDAEHALDPVYARKLGVDIDNLLCSQP
DTGEQALEICDALARSGAVDVIVVDSVAALTPKAEIEGEIGDSHMGLAARMMSQAMRKLA
GNLKQSNTLLIFINQIRMKIGVMFGNPETTTGGNALKFYASVRLDIRRIGAVKEGDNVVG
SETRVKVVKNKIAAPFKQAEFQILYGEGINFYGELVDLGVKEKLIEKAGAWYSYNGEKIG
QGKANATTWLKENPATAKEIEKRVRELLLSNQNATPDFAVDDS--EGVAETNEDF--
>Salmonella_enterica_strain_CFSAN051295_chromosome__complete_genome
MAIDENKQKALAAALGQIEKQFGKGSIMRLGEDRSMDVETISTGSLSLDIALGAGGLPMG
RIVEIYGPESSGKTTLTLQVIAAAQREGKTCAFIDAEHALDPVYARKLGVDIDNLLCSQP
DTGEQALEICDALARSGAVDVIVVDSVAALTPKAEIEGEIGDSHMGLAARMMSQAMRKLA
GNLKQSNTLLIFINQIRMKIGVMFGNPETTTGGNALKFYASVRLDIRRIGAVKEGDNVVG
SETRVKVVKNKIAAPFKQAEFQILYGEGINFYGELVDLGVKEKLIEKAGAWYSYNGEKIG
QGKANATTWLKENPATAKEIEKRVRELLLSNQNATPDFAVDDS--EGVAETNEDF--
>Salmonella_enterica_subsp._enterica_serovar_Abaetetuba_str._ATCC_35640__complete_genome
MAIDENKQKALAAALGQIEKQFGKGSIMRLGEDRSMDVETISTGSLSLDIALGAGGLPMG
RIVEIYGPESSGKTTLTLQVIAAAQREGKTCAFIDAEHALDPVYARKLGVDIDNLLCSQP
DTGEQALEICDALARSGAVDVIVVDSVAALTPKAEIEGEIGDSHMGLAARMMSQAMRKLA
GNLKQSNTLLIFINQIRMKIGVMFGNPETTTGGNALKFYASVRLDIRRIGAVKEGDNVVG
SETRVKVVKNKIAAPFKQAEFQILYGEGINFYGELVDLGVKEKLIEKAGAWYSYNGEKIG
QGKANATTWLKENPATAKEIEKRVRELLLSNQNATPDFAVDDS--EGVAETNEDF--
>Salmonella_enterica_subsp._enterica_serovar_Typhi_strain_343077_286126_chromosome__complete_genome
MAIDENKQKALAAALGQIEKQFGKGSIMRLGEDRSMDVETISTGSLSLDIALGAGGLPMG
RIVEIYGPESSGKTTLTLQVIAAAQREGKTCAFIDAEHALDPVYARKLGVDIDNLLCSQP
DTGEQALEICDALARSGAVDVIVVDSVAALTPKAEIEGEIGDSHMGLAARMMSQAMRKLA
GNLKQSNTLLIFINQIRMKIGVMFGNPETTTGGNALKFYASVRLDIRRIGAVKEGDNVVG
SETRVKVVKNKIAAPFKQAEFQILYGEGINFYGELVDLGVKEKLIEKAGAWYSYNGEKIG
QGKANATTWLKENPATAKEIEKRVRELLLSNQNATPDFAVDDS--EGVAETNEDF--
>Salmonella_enterica_subsp._enterica_serovar_1_4_[5]_12_i_-_strain_SA20070548_chromosome__complete_genome
MAIDENKQKALAAALGQIEKQFGKGSIMRLGEDRSMDVETISTGSLSLDIALGAGGLPMG
RIVEIYGPESSGKTTLTLQVIAAAQREGKTCAFIDAEHALDPVYARKLGVDIDNLLCSQP
DTGEQALEICDALARSGAVDVIVVDSVAALTPKAEIEGEIGDSHMGLAARMMSQAMRKLA
GNLKQSNTLLIFINQIRMKIGVMFGNPETTTGGNALKFYASVRLDIRRIGAVKEGDNVVG
SETRVKVVKNKIAAPFKQAEFQILYGEGINFYGELVDLGVKEKLIEKAGAWYSYNGEKIG
QGKANATTWLKENPATAKEIEKRVRELLLSNQNATPDFAVDDS--EGVAETNEDF--
>Salmonella_enterica_subsp._enterica_serovar_Typhi_strain_343077_255118_chromosome__complete_genome
MAIDENKQKALAAALGQIEKQFGKGSIMRLGEDRSMDVETISTGSLSLDIALGAGGLPMG
RIVEIYGPESSGKTTLTLQVIAAAQREGKTCAFIDAEHALDPVYARKLGVDIDNLLCSQP
DTGEQALEICDALARSGAVDVIVVDSVAALTPKAEIEGEIGDSHMGLAARMMSQAMRKLA
GNLKQSNTLLIFINQIRMKIGVMFGNPETTTGGNALKFYASVRLDIRRIGAVKEGDNVVG
SETRVKVVKNKIAAPFKQAEFQILYGEGINFYGELVDLGVKEKLIEKAGAWYSYNGEKIG
QGKANATTWLKENPATAKEIEKRVRELLLSNQNATPDFAVDDS--EGVAETNEDF--
>Salmonella_enterica_subsp._enterica_serovar_Typhimurium_str._798__complete_genome
MAIDENKQKALAAALGQIEKQFGKGSIMRLGEDRSMDVETISTGSLSLDIALGAGGLPMG
RIVEIYGPESSGKTTLTLQVIAAAQREGKTCAFIDAEHALDPVYARKLGVDIDNLLCSQP
DTGEQALEICDALARSGAVDVIVVDSVAALTPKAEIEGEIGDSHMGLAARMMSQAMRKLA
GNLKQSNTLLIFINQIRMKIGVMFGNPETTTGGNALKFYASVRLDIRRIGAVKEGDNVVG
SETRVKVVKNKIAAPFKQAEFQILYGEGINFYGELVDLGVKEKLIEKAGAWYSYNGEKIG
QGKANATTWLKENPATAKEIEKRVRELLLSNQNATPDFAVDDS--EGVAETNEDF--
>Salmonella_enterica_subsp._enterica_strain_CFSA12_chromosome__complete_genome
MAIDENKQKALAAALGQIEKQFGKGSIMRLGEDRSMDVETISTGSLSLDIALGAGGLPMG
RIVEIYGPESSGKTTLTLQVIAAAQREGKTCAFIDAEHALDPVYARKLGVDIDNLLCSQP
DTGEQALEICDALARSGAVDVIVVDSVAALTPKAEIEGEIGDSHMGLAARMMSQAMRKLA
GNLKQSNTLLIFINQIRMKIGVMFGNPETTTGGNALKFYASVRLDIRRIGAVKEGDNVVG
SETRVKVVKNKIAAPFKQAEFQILYGEGINFYGELVDLGVKEKLIEKAGAWYSYNGEKIG
QGKANATTWLKENPATAKEIEKRVRELLLSNQNATPDFAVDDS--EGVAETNEDF--
>Salmonella_enterica_subsp._enterica_serovar_Enteritidis_str._EC20121177__complete_genome
MAIDENKQKALAAALGQIEKQFGKGSIMRLGEDRSMDVETISTGSLSLDIALGAGGLPMG
RIVEIYGPESSGKTTLTLQVIAAAQREGKTCAFIDAEHALDPVYARKLGVDIDNLLCSQP
DTGEQALEICDALARSGAVDVIVVDSVAALTPKAEIEGEIGDSHMGLAARMMSQAMRKLA
GNLKQSNTLLIFINQIRMKIGVMFGNPETTTGGNALKFYASVRLDIRRIGAVKEGDNVVG
SETRVKVVKNKIAAPFKQAEFQILYGEGINFYGELVDLGVKEKLIEKAGAWYSYNGEKIG
QGKANATTWLKENPATAKEIEKRVRELLLSNQNATPDFAVDDS--EGVAETNEDF--
>Salmonella_enterica_subsp._enterica_serovar_Schwarzengrund_strain_9355_chromosome__complete_genome
MAIDENKQKALAAALGQIEKQFGKGSIMRLGEDRSMDVETISTGSLSLDIALGAGGLPMG
RIVEIYGPESSGKTTLTLQVIAAAQREGKTCAFIDAEHALDPVYARKLGVDIDNLLCSQP
DTGEQALEICDALARSGAVDVIVVDSVAALTPKAEIEGEIGDSHMGLAARMMSQAMRKLA
GNLKQSNTLLIFINQIRMKIGVMFGNPETTTGGNALKFYASVRLDIRRIGAVKEGDNVVG
SETRVKVVKNKIAAPFKQAEFQILYGEGINFYGELVDLGVKEKLIEKAGAWYSYNGEKIG
QGKANATTWLKENPATAKEIEKRVRELLLSNQNATPDFAVDDS--EGVAETNEDF--
>Salmonella_enterica_subsp._enterica_serovar_Bareilly_str._CFSAN000228_chromosome__complete_genome
MAIDENKQKALAAALGQIEKQFGKGSIMRLGEDRSMDVETISTGSLSLDIALGAGGLPMG
RIVEIYGPESSGKTTLTLQVIAAAQREGKTCAFIDAEHALDPVYARKLGVDIDNLLCSQP
DTGEQALEICDALARSGAVDVIVVDSVAALTPKAEIEGEIGDSHMGLAARMMSQAMRKLA
GNLKQSNTLLIFINQIRMKIGVMFGNPETTTGGNALKFYASVRLDIRRIGAVKEGDNVVG
SETRVKVVKNKIAAPFKQAEFQILYGEGINFYGELVDLGVKEKLIEKAGAWYSYNGEKIG
QGKANATTWLKENPATAKEIEKRVRELLLSNQNATPDFAVDDS--EGVAETNEDF--
>Salmonella_enterica_subsp._enterica_serovar_Typhimurium_strain_SO3__complete_genome
MAIDENKQKALAAALGQIEKQFGKGSIMRLGEDRSMDVETISTGSLSLDIALGAGGLPMG
RIVEIYGPESSGKTTLTLQVIAAAQREGKTCAFIDAEHALDPVYARKLGVDIDNLLCSQP
DTGEQALEICDALARSGAVDVIVVDSVAALTPKAEIEGEIGDSHMGLAARMMSQAMRKLA
GNLKQSNTLLIFINQIRMKIGVMFGNPETTTGGNALKFYASVRLDIRRIGAVKEGDNVVG
SETRVKVVKNKIAAPFKQAEFQILYGEGINFYGELVDLGVKEKLIEKAGAWYSYNGEKIG
QGKANATTWLKENPATAKEIEKRVRELLLSNQNATPDFAVDDS--EGVAETNEDF--
>Salmonella_enterica_subsp._enterica_serovar_Infantis_strain_CVM44454__complete_genome
MAIDENKQKALAAALGQIEKQFGKGSIMRLGEDRSMDVETISTGSLSLDIALGAGGLPMG
RIVEIYGPESSGKTTLTLQVIAAAQREGKTCAFIDAEHALDPVYARKLGVDIDNLLCSQP
DTGEQALEICDALARSGAVDVIVVDSVAALTPKAEIEGEIGDSHMGLAARMMSQAMRKLA
GNLKQSNTLLIFINQIRMKIGVMFGNPETTTGGNALKFYASVRLDIRRIGAVKEGDNVVG
SETRVKVVKNKIAAPFKQAEFQILYGEGINFYGELVDLGVKEKLIEKAGAWYSYNGEKIG
QGKANATTWLKENPATAKEIEKRVRELLLSNQNATPDFAVDDS--EGVAETNEDF--
>Salmonella_enterica_subsp._enterica_serovar_Typhimurium_strain_E2840153550_chromosome__complete_genome
MAIDENKQKALAAALGQIEKQFGKGSIMRLGEDRSMDVETISTGSLSLDIALGAGGLPMG
RIVEIYGPESSGKTTLTLQVIAAAQREGKTCAFIDAEHALDPVYARKLGVDIDNLLCSQP
DTGEQALEICDALARSGAVDVIVVDSVAALTPKAEIEGEIGDSHMGLAARMMSQAMRKLA
GNLKQSNTLLIFINQIRMKIGVMFGNPETTTGGNALKFYASVRLDIRRIGAVKEGDNVVG
SETRVKVVKNKIAAPFKQAEFQILYGEGINFYGELVDLGVKEKLIEKAGAWYSYNGEKIG
QGKANATTWLKENPATAKEIEKRVRELLLSNQNATPDFAVDDS--EGVAETNEDF--
>Salmonella_enterica_subsp._enterica_serovar_Worthington_strain_7101.67_chromosome__complete_genome
MAIDENKQKALAAALGQIEKQFGKGSIMRLGEDRSMDVETISTGSLSLDIALGAGGLPMG
RIVEIYGPESSGKTTLTLQVIAAAQREGKTCAFIDAEHALDPVYARKLGVDIDNLLCSQP
DTGEQALEICDALARSGAVDVIVVDSVAALTPKAEIEGEIGDSHMGLAARMMSQAMRKLA
GNLKQSNTLLIFINQIRMKIGVMFGNPETTTGGNALKFYASVRLDIRRIGAVKEGDNVVG
SETRVKVVKNKIAAPFKQAEFQILYGEGINFYGELVDLGVKEKLIEKAGAWYSYNGEKIG
QGKANATTWLKENPATAKEIEKRVRELLLSNQNATPDFAVDDS--EGVAETNEDF--
>Salmonella_enterica_subsp._enterica_serovar_Senftenberg_str._361154004_chromosome__complete_genome
MAIDENKQKALAAALGQIEKQFGKGSIMRLGEDRSMDVETISTGSLSLDIALGAGGLPMG
RIVEIYGPESSGKTTLTLQVIAAAQREGKTCAFIDAEHALDPVYARKLGVDIDNLLCSQP
DTGEQALEICDALARSGAVDVIVVDSVAALTPKAEIEGEIGDSHMGLAARMMSQAMRKLA
GNLKQSNTLLIFINQIRMKIGVMFGNPETTTGGNALKFYASVRLDIRRIGAVKEGDNVVG
SETRVKVVKNKIAAPFKQAEFQILYGEGINFYGELVDLGVKEKLIEKAGAWYSYNGEKIG
QGKANATTWLKENPATAKEIEKRVRELLLSNQNATPDFAVDDS--EGVAETNEDF--
>Salmonella_enterica_strain_FDAARGOS_319_chromosome__complete_genome
MAIDENKQKALAAALGQIEKQFGKGSIMRLGEDRSMDVETISTGSLSLDIALGAGGLPMG
RIVEIYGPESSGKTTLTLQVIAAAQREGKTCAFIDAEHALDPVYARKLGVDIDNLLCSQP
DTGEQALEICDALARSGAVDVIVVDSVAALTPKAEIEGEIGDSHMGLAARMMSQAMRKLA
GNLKQSNTLLIFINQIRMKIGVMFGNPETTTGGNALKFYASVRLDIRRIGAVKEGDNVVG
SETRVKVVKNKIAAPFKQAEFQILYGEGINFYGELVDLGVKEKLIEKAGAWYSYNGEKIG
QGKANATTWLKENPATAKEIEKRVRELLLSNQNATPDFAVDDS--EGVAETNEDF--
>Salmonella_enterica_subsp._enterica_serovar_Typhimurium_str._U288__complete_genome
MAIDENKQKALAAALGQIEKQFGKGSIMRLGEDRSMDVETISTGSLSLDIALGAGGLPMG
RIVEIYGPESSGKTTLTLQVIAAAQREGKTCAFIDAEHALDPVYARKLGVDIDNLLCSQP
DTGEQALEICDALARSGAVDVIVVDSVAALTPKAEIEGEIGDSHMGLAARMMSQAMRKLA
GNLKQSNTLLIFINQIRMKIGVMFGNPETTTGGNALKFYASVRLDIRRIGAVKEGDNVVG
SETRVKVVKNKIAAPFKQAEFQILYGEGINFYGELVDLGVKEKLIEKAGAWYSYNGEKIG
QGKANATTWLKENPATAKEIEKRVRELLLSNQNATPDFAVDDS--EGVAETNEDF--
>Salmonella_enterica_subsp._enterica_serovar_Stanleyville_str._CFSAN000624_strain_SARB61_chromosome__complete_genome
MAIDENKQKALAAALGQIEKQFGKGSIMRLGEDRSMDVETISTGSLSLDIALGAGGLPMG
RIVEIYGPESSGKTTLTLQVIAAAQREGKTCAFIDAEHALDPVYARKLGVDIDNLLCSQP
DTGEQALEICDALARSGAVDVIVVDSVAALTPKAEIEGEIGDSHMGLAARMMSQAMRKLA
GNLKQSNTLLIFINQIRMKIGVMFGNPETTTGGNALKFYASVRLDIRRIGAVKEGDNVVG
SETRVKVVKNKIAAPFKQAEFQILYGEGINFYGELVDLGVKEKLIEKAGAWYSYNGEKIG
QGKANATTWLKENPATAKEIEKRVRELLLSNQNATPDFAVDDS--EGVAETNEDF--
>Salmonella_enterica_subsp._enterica_serovar_Newport_str._Levine_1__complete_genome
MAIDENKQKALAAALGQIEKQFGKGSIMRLGEDRSMDVETISTGSLSLDIALGAGGLPMG
RIVEIYGPESSGKTTLTLQVIAAAQREGKTCAFIDAEHALDPVYARKLGVDIDNLLCSQP
DTGEQALEICDALARSGAVDVIVVDSVAALTPKAEIEGEIGDSHMGLAARMMSQAMRKLA
GNLKQSNTLLIFINQIRMKIGVMFGNPETTTGGNALKFYASVRLDIRRIGAVKEGDNVVG
SETRVKVVKNKIAAPFKQAEFQILYGEGINFYGELVDLGVKEKLIEKAGAWYSYNGEKIG
QGKANATTWLKENPATAKEIEKRVRELLLSNQNATPDFAVDDS--EGVAETNEDF--
>Salmonella_enterica_subsp._enterica_serovar_Enteritidis_str._SA19980677__complete_genome
MAIDENKQKALAAALGQIEKQFGKGSIMRLGEDRSMDVETISTGSLSLDIALGAGGLPMG
RIVEIYGPESSGKTTLTLQVIAAAQREGKTCAFIDAEHALDPVYARKLGVDIDNLLCSQP
DTGEQALEICDALARSGAVDVIVVDSVAALTPKAEIEGEIGDSHMGLAARMMSQAMRKLA
GNLKQSNTLLIFINQIRMKIGVMFGNPETTTGGNALKFYASVRLDIRRIGAVKEGDNVVG
SETRVKVVKNKIAAPFKQAEFQILYGEGINFYGELVDLGVKEKLIEKAGAWYSYNGEKIG
QGKANATTWLKENPATAKEIEKRVRELLLSNQNATPDFAVDDS--EGVAETNEDF--
>Salmonella_enterica_subsp._enterica_serovar_Saintpaul_str._SARA26_chromosome__complete_genome
MAIDENKQKALAAALGQIEKQFGKGSIMRLGEDRSMDVETISTGSLSLDIALGAGGLPMG
RIVEIYGPESSGKTTLTLQVIAAAQREGKTCAFIDAEHALDPVYARKLGVDIDNLLCSQP
DTGEQALEICDALARSGAVDVIVVDSVAALTPKAEIEGEIGDSHMGLAARMMSQAMRKLA
GNLKQSNTLLIFINQIRMKIGVMFGNPETTTGGNALKFYASVRLDIRRIGAVKEGDNVVG
SETRVKVVKNKIAAPFKQAEFQILYGEGINFYGELVDLGVKEKLIEKAGAWYSYNGEKIG
QGKANATTWLKENPATAKEIEKRVRELLLSNQNATPDFAVDDS--EGVAETNEDF--
>Salmonella_enterica_subsp._enterica_serovar_1_4_[5]_12_i_-_strain_PNCS014881_chromosome__complete_genome
MAIDENKQKALAAALGQIEKQFGKGSIMRLGEDRSMDVETISTGSLSLDIALGAGGLPMG
RIVEIYGPESSGKTTLTLQVIAAAQREGKTCAFIDAEHALDPVYARKLGVDIDNLLCSQP
DTGEQALEICDALARSGAVDVIVVDSVAALTPKAEIEGEIGDSHMGLAARMMSQAMRKLA
GNLKQSNTLLIFINQIRMKIGVMFGNPETTTGGNALKFYASVRLDIRRIGAVKEGDNVVG
SETRVKVVKNKIAAPFKQAEFQILYGEGINFYGELVDLGVKEKLIEKAGAWYSYNGEKIG
QGKANATTWLKENPATAKEIEKRVRELLLSNQNATPDFAVDDS--EGVAETNEDF--
>Salmonella_enterica_subsp._enterica_strain_AD19_chromosome__complete_genome
MAIDENKQKALAAALGQIEKQFGKGSIMRLGEDRSMDVETISTGSLSLDIALGAGGLPMG
RIVEIYGPESSGKTTLTLQVIAAAQREGKTCAFIDAEHALDPVYARKLGVDIDNLLCSQP
DTGEQALEICDALARSGAVDVIVVDSVAALTPKAEIEGEIGDSHMGLAARMMSQAMRKLA
GNLKQSNTLLIFINQIRMKIGVMFGNPETTTGGNALKFYASVRLDIRRIGAVKEGDNVVG
SETRVKVVKNKIAAPFKQAEFQILYGEGINFYGELVDLGVKEKLIEKAGAWYSYNGEKIG
QGKANATTWLKENPATAKEIEKRVRELLLSNQNATPDFAVDDS--EGVAETNEDF--
>Salmonella_enterica_subsp._enterica_serovar_Derby_strain_Sa64_chromosome__complete_genome
MAIDENKQKALAAALGQIEKQFGKGSIMRLGEDRSMDVETISTGSLSLDIALGAGGLPMG
RIVEIYGPESSGKTTLTLQVIAAAQREGKTCAFIDAEHALDPVYARKLGVDIDNLLCSQP
DTGEQALEICDALARSGAVDVIVVDSVAALTPKAEIEGEIGDSHMGLAARMMSQAMRKLA
GNLKQSNTLLIFINQIRMKIGVMFGNPETTTGGNALKFYASVRLDIRRIGAVKEGDNVVG
SETRVKVVKNKIAAPFKQAEFQILYGEGINFYGELVDLGVKEKLIEKAGAWYSYNGEKIG
QGKANATTWLKENPATAKEIEKRVRELLLSNQNATPDFAVDDS--EGVAETNEDF--
>Salmonella_enterica_strain_FDAARGOS_320_chromosome__complete_genome
MAIDENKQKALAAALGQIEKQFGKGSIMRLGEDRSMDVETISTGSLSLDIALGAGGLPMG
RIVEIYGPESSGKTTLTLQVIAAAQREGKTCAFIDAEHALDPVYARKLGVDIDNLLCSQP
DTGEQALEICDALARSGAVDVIVVDSVAALTPKAEIEGEIGDSHMGLAARMMSQAMRKLA
GNLKQSNTLLIFINQIRMKIGVMFGNPETTTGGNALKFYASVRLDIRRIGAVKEGDNVVG
SETRVKVVKNKIAAPFKQAEFQILYGEGINFYGELVDLGVKEKLIEKAGAWYSYNGEKIG
QGKANATTWLKENPATAKEIEKRVRELLLSNQNATPDFAVDDS--EGVAETNEDF--
>Salmonella_enterica_strain_FSW0104_chromosome__complete_genome
MAIDENKQKALAAALGQIEKQFGKGSIMRLGEDRSMDVETISTGSLSLDIALGAGGLPMG
RIVEIYGPESSGKTTLTLQVIAAAQREGKTCAFIDAEHALDPVYARKLGVDIDNLLCSQP
DTGEQALEICDALARSGAVDVIVVDSVAALTPKAEIEGEIGDSHMGLAARMMSQAMRKLA
GNLKQSNTLLIFINQIRMKIGVMFGNPETTTGGNALKFYASVRLDIRRIGAVKEGDNVVG
SETRVKVVKNKIAAPFKQAEFQILYGEGINFYGELVDLGVKEKLIEKAGAWYSYNGEKIG
QGKANATTWLKENPATAKEIEKRVRELLLSNQNATPDFAVDDS--EGVAETNEDF--
>Salmonella_enterica_subsp._enterica_serovar_Enteritidis_strain_OLF-SE1-1019-1__complete_genome
MAIDENKQKALAAALGQIEKQFGKGSIMRLGEDRSMDVETISTGSLSLDIALGAGGLPMG
RIVEIYGPESSGKTTLTLQVIAAAQREGKTCAFIDAEHALDPVYARKLGVDIDNLLCSQP
DTGEQALEICDALARSGAVDVIVVDSVAALTPKAEIEGEIGDSHMGLAARMMSQAMRKLA
GNLKQSNTLLIFINQIRMKIGVMFGNPETTTGGNALKFYASVRLDIRRIGAVKEGDNVVG
SETRVKVVKNKIAAPFKQAEFQILYGEGINFYGELVDLGVKEKLIEKAGAWYSYNGEKIG
QGKANATTWLKENPATAKEIEKRVRELLLSNQNATPDFAVDDS--EGVAETNEDF--
>Salmonella_enterica_subsp._enterica_serovar_Bareilly_str._CFSAN001115_chromosome__complete_genome
MAIDENKQKALAAALGQIEKQFGKGSIMRLGEDRSMDVETISTGSLSLDIALGAGGLPMG
RIVEIYGPESSGKTTLTLQVIAAAQREGKTCAFIDAEHALDPVYARKLGVDIDNLLCSQP
DTGEQALEICDALARSGAVDVIVVDSVAALTPKAEIEGEIGDSHMGLAARMMSQAMRKLA
GNLKQSNTLLIFINQIRMKIGVMFGNPETTTGGNALKFYASVRLDIRRIGAVKEGDNVVG
SETRVKVVKNKIAAPFKQAEFQILYGEGINFYGELVDLGVKEKLIEKAGAWYSYNGEKIG
QGKANATTWLKENPATAKEIEKRVRELLLSNQNATPDFAVDDS--EGVAETNEDF--
>Salmonella_enterica_strain_CFSAN045764_chromosome__complete_genome
MAIDENKQKALAAALGQIEKQFGKGSIMRLGEDRSMDVETISTGSLSLDIALGAGGLPMG
RIVEIYGPESSGKTTLTLQVIAAAQREGKTCAFIDAEHALDPVYARKLGVDIDNLLCSQP
DTGEQALEICDALARSGAVDVIVVDSVAALTPKAEIEGEIGDSHMGLAARMMSQAMRKLA
GNLKQSNTLLIFINQIRMKIGVMFGNPETTTGGNALKFYASVRLDIRRIGAVKEGDNVVG
SETRVKVVKNKIAAPFKQAEFQILYGEGINFYGELVDLGVKEKLIEKAGAWYSYNGEKIG
QGKANATTWLKENPATAKEIEKRVRELLLSNQNATPDFAVDDS--EGVAETNEDF--
>Salmonella_enterica_subsp._enterica_serovar_Typhimurium_strain_VNP20009__complete_genome
MAIDENKQKALAAALGQIEKQFGKGSIMRLGEDRSMDVETISTGSLSLDIALGAGGLPMG
RIVEIYGPESSGKTTLTLQVIAAAQREGKTCAFIDAEHALDPVYARKLGVDIDNLLCSQP
DTGEQALEICDALARSGAVDVIVVDSVAALTPKAEIEGEIGDSHMGLAARMMSQAMRKLA
GNLKQSNTLLIFINQIRMKIGVMFGNPETTTGGNALKFYASVRLDIRRIGAVKEGDNVVG
SETRVKVVKNKIAAPFKQAEFQILYGEGINFYGELVDLGVKEKLIEKAGAWYSYNGEKIG
QGKANATTWLKENPATAKEIEKRVRELLLSNQNATPDFAVDDS--EGVAETNEDF--
>Salmonella_enterica_subsp._enterica_serovar_Pullorum_str._S06004__complete_genome
MAIDENKQKALAAALGQIEKQFGKGSIMRLGEDRSMDVETISTGSLSLDIALGAGGLPMG
RIVEIYGPESSGKTTLTLQVIAAAQREGKTCAFIDAEHALDPVYARKLGVDIDNLLCSQP
DTGEQALEICDALARSGAVDVIVVDSVAALTPKAEIEGEIGDSHMGLAARMMSQAMRKLA
GNLKQSNTLLIFINQIRMKIGVMFGNPETTTGGNALKFYASVRLDIRRIGAVKEGDNVVG
SETRVKVVKNKIAAPFKQAEFQILYGEGINFYGELVDLGVKEKLIEKAGAWYSYNGEKIG
QGKANATTWLKENPATAKEIEKRVRELLLSNQNATPDFAVDDS--EGVAETNEDF--
>Salmonella_enterica_subsp._enterica_serovar_Typhimurium_str._USDA-ARS-USMARC-1810_chromosome__complete_genome
MAIDENKQKALAAALGQIEKQFGKGSIMRLGEDRSMDVETISTGSLSLDIALGAGGLPMG
RIVEIYGPESSGKTTLTLQVIAAAQREGKTCAFIDAEHALDPVYARKLGVDIDNLLCSQP
DTGEQALEICDALARSGAVDVIVVDSVAALTPKAEIEGEIGDSHMGLAARMMSQAMRKLA
GNLKQSNTLLIFINQIRMKIGVMFGNPETTTGGNALKFYASVRLDIRRIGAVKEGDNVVG
SETRVKVVKNKIAAPFKQAEFQILYGEGINFYGELVDLGVKEKLIEKAGAWYSYNGEKIG
QGKANATTWLKENPATAKEIEKRVRELLLSNQNATPDFAVDDS--EGVAETNEDF--
>Salmonella_enterica_subsp._enterica_serovar_Enteritidis_str._SA19970769__complete_genome
MAIDENKQKALAAALGQIEKQFGKGSIMRLGEDRSMDVETISTGSLSLDIALGAGGLPMG
RIVEIYGPESSGKTTLTLQVIAAAQREGKTCAFIDAEHALDPVYARKLGVDIDNLLCSQP
DTGEQALEICDALARSGAVDVIVVDSVAALTPKAEIEGEIGDSHMGLAARMMSQAMRKLA
GNLKQSNTLLIFINQIRMKIGVMFGNPETTTGGNALKFYASVRLDIRRIGAVKEGDNVVG
SETRVKVVKNKIAAPFKQAEFQILYGEGINFYGELVDLGVKEKLIEKAGAWYSYNGEKIG
QGKANATTWLKENPATAKEIEKRVRELLLSNQNATPDFAVDDS--EGVAETNEDF--
>Salmonella_enterica_subsp._enterica_serovar_Anatum_str._USDA-ARS-USMARC-1765_chromosome__complete_genome
MAIDENKQKALAAALGQIEKQFGKGSIMRLGEDRSMDVETISTGSLSLDIALGAGGLPMG
RIVEIYGPESSGKTTLTLQVIAAAQREGKTCAFIDAEHALDPVYARKLGVDIDNLLCSQP
DTGEQALEICDALARSGAVDVIVVDSVAALTPKAEIEGEIGDSHMGLAARMMSQAMRKLA
GNLKQSNTLLIFINQIRMKIGVMFGNPETTTGGNALKFYASVRLDIRRIGAVKEGDNVVG
SETRVKVVKNKIAAPFKQAEFQILYGEGINFYGELVDLGVKEKLIEKAGAWYSYNGEKIG
QGKANATTWLKENPATAKEIEKRVRELLLSNQNATPDFAVDDS--EGVAETNEDF--
>Salmonella_enterica_subsp._enterica_strain_ST1539_chromosome__complete_genome
MAIDENKQKALAAALGQIEKQFGKGSIMRLGEDRSMDVETISTGSLSLDIALGAGGLPMG
RIVEIYGPESSGKTTLTLQVIAAAQREGKTCAFIDAEHALDPVYARKLGVDIDNLLCSQP
DTGEQALEICDALARSGAVDVIVVDSVAALTPKAEIEGEIGDSHMGLAARMMSQAMRKLA
GNLKQSNTLLIFINQIRMKIGVMFGNPETTTGGNALKFYASVRLDIRRIGAVKEGDNVVG
SETRVKVVKNKIAAPFKQAEFQILYGEGINFYGELVDLGVKEKLIEKAGAWYSYNGEKIG
QGKANATTWLKENPATAKEIEKRVRELLLSNQNATPDFAVDDS--EGVAETNEDF--
>Salmonella_enterica_subsp._enterica_serovar_Enteritidis_str._EC20120200__complete_genome
MAIDENKQKALAAALGQIEKQFGKGSIMRLGEDRSMDVETISTGSLSLDIALGAGGLPMG
RIVEIYGPESSGKTTLTLQVIAAAQREGKTCAFIDAEHALDPVYARKLGVDIDNLLCSQP
DTGEQALEICDALARSGAVDVIVVDSVAALTPKAEIEGEIGDSHMGLAARMMSQAMRKLA
GNLKQSNTLLIFINQIRMKIGVMFGNPETTTGGNALKFYASVRLDIRRIGAVKEGDNVVG
SETRVKVVKNKIAAPFKQAEFQILYGEGINFYGELVDLGVKEKLIEKAGAWYSYNGEKIG
QGKANATTWLKENPATAKEIEKRVRELLLSNQNATPDFAVDDS--EGVAETNEDF--
>Salmonella_enterica_subsp._enterica_serovar_Enteritidis_strain_OLF-SE7-100819__complete_genome
MAIDENKQKALAAALGQIEKQFGKGSIMRLGEDRSMDVETISTGSLSLDIALGAGGLPMG
RIVEIYGPESSGKTTLTLQVIAAAQREGKTCAFIDAEHALDPVYARKLGVDIDNLLCSQP
DTGEQALEICDALARSGAVDVIVVDSVAALTPKAEIEGEIGDSHMGLAARMMSQAMRKLA
GNLKQSNTLLIFINQIRMKIGVMFGNPETTTGGNALKFYASVRLDIRRIGAVKEGDNVVG
SETRVKVVKNKIAAPFKQAEFQILYGEGINFYGELVDLGVKEKLIEKAGAWYSYNGEKIG
QGKANATTWLKENPATAKEIEKRVRELLLSNQNATPDFAVDDS--EGVAETNEDF--
>Salmonella_enterica_subsp._enterica_serovar_Typhimurium_strain_FDAARGOS_321_chromosome__complete_genome
MAIDENKQKALAAALGQIEKQFGKGSIMRLGEDRSMDVETISTGSLSLDIALGAGGLPMG
RIVEIYGPESSGKTTLTLQVIAAAQREGKTCAFIDAEHALDPVYARKLGVDIDNLLCSQP
DTGEQALEICDALARSGAVDVIVVDSVAALTPKAEIEGEIGDSHMGLAARMMSQAMRKLA
GNLKQSNTLLIFINQIRMKIGVMFGNPETTTGGNALKFYASVRLDIRRIGAVKEGDNVVG
SETRVKVVKNKIAAPFKQAEFQILYGEGINFYGELVDLGVKEKLIEKAGAWYSYNGEKIG
QGKANATTWLKENPATAKEIEKRVRELLLSNQNATPDFAVDDS--EGVAETNEDF--
>Salmonella_enterica_subsp._enterica_serovar_Chester_str._ATCC_11997__complete_genome
MAIDENKQKALAAALGQIEKQFGKGSIMRLGEDRSMDVETISTGSLSLDIALGAGGLPMG
RIVEIYGPESSGKTTLTLQVIAAAQREGKTCAFIDAEHALDPVYARKLGVDIDNLLCSQP
DTGEQALEICDALARSGAVDVIVVDSVAALTPKAEIEGEIGDSHMGLAARMMSQAMRKLA
GNLKQSNTLLIFINQIRMKIGVMFGNPETTTGGNALKFYASVRLDIRRIGAVKEGDNVVG
SETRVKVVKNKIAAPFKQAEFQILYGEGINFYGELVDLGVKEKLIEKAGAWYSYNGEKIG
QGKANATTWLKENPATAKEIEKRVRELLLSNQNATPDFAVDDS--EGVAETNEDF--
>Salmonella_enterica_subsp._enterica_serovar_Typhi_strain_343077_285138_chromosome__complete_genome
MAIDENKQKALAAALGQIEKQFGKGSIMRLGEDRSMDVETISTGSLSLDIALGAGGLPMG
RIVEIYGPESSGKTTLTLQVIAAAQREGKTCAFIDAEHALDPVYARKLGVDIDNLLCSQP
DTGEQALEICDALARSGAVDVIVVDSVAALTPKAEIEGEIGDSHMGLAARMMSQAMRKLA
GNLKQSNTLLIFINQIRMKIGVMFGNPETTTGGNALKFYASVRLDIRRIGAVKEGDNVVG
SETRVKVVKNKIAAPFKQAEFQILYGEGINFYGELVDLGVKEKLIEKAGAWYSYNGEKIG
QGKANATTWLKENPATAKEIEKRVRELLLSNQNATPDFAVDDS--EGVAETNEDF--
>Salmonella_enterica_subsp._enterica_serovar_Typhimurium_strain_14028_chromosome__complete_genome
MAIDENKQKALAAALGQIEKQFGKGSIMRLGEDRSMDVETISTGSLSLDIALGAGGLPMG
RIVEIYGPESSGKTTLTLQVIAAAQREGKTCAFIDAEHALDPVYARKLGVDIDNLLCSQP
DTGEQALEICDALARSGAVDVIVVDSVAALTPKAEIEGEIGDSHMGLAARMMSQAMRKLA
GNLKQSNTLLIFINQIRMKIGVMFGNPETTTGGNALKFYASVRLDIRRIGAVKEGDNVVG
SETRVKVVKNKIAAPFKQAEFQILYGEGINFYGELVDLGVKEKLIEKAGAWYSYNGEKIG
QGKANATTWLKENPATAKEIEKRVRELLLSNQNATPDFAVDDS--EGVAETNEDF--
>Salmonella_enterica_strain_FDAARGOS_313_chromosome__complete_genome
MAIDENKQKALAAALGQIEKQFGKGSIMRLGEDRSMDVETISTGSLSLDIALGAGGLPMG
RIVEIYGPESSGKTTLTLQVIAAAQREGKTCAFIDAEHALDPVYARKLGVDIDNLLCSQP
DTGEQALEICDALARSGAVDVIVVDSVAALTPKAEIEGEIGDSHMGLAARMMSQAMRKLA
GNLKQSNTLLIFINQIRMKIGVMFGNPETTTGGNALKFYASVRLDIRRIGAVKEGDNVVG
SETRVKVVKNKIAAPFKQAEFQILYGEGINFYGELVDLGVKEKLIEKAGAWYSYNGEKIG
QGKANATTWLKENPATAKEIEKRVRELLLSNQNATPDFAVDDS--EGVAETNEDF--
>Salmonella_enterica_strain_FDAARGOS_317_chromosome__complete_genome
MAIDENKQKALAAALGQIEKQFGKGSIMRLGEDRSMDVETISTGSLSLDIALGAGGLPMG
RIVEIYGPESSGKTTLTLQVIAAAQREGKTCAFIDAEHALDPVYARKLGVDIDNLLCSQP
DTGEQALEICDALARSGAVDVIVVDSVAALTPKAEIEGEIGDSHMGLAARMMSQAMRKLA
GNLKQSNTLLIFINQIRMKIGVMFGNPETTTGGNALKFYASVRLDIRRIGAVKEGDNVVG
SETRVKVVKNKIAAPFKQAEFQILYGEGINFYGELVDLGVKEKLIEKAGAWYSYNGEKIG
QGKANATTWLKENPATAKEIEKRVRELLLSNQNATPDFAVDDS--EGVAETNEDF--
>Salmonella_enterica_subsp._enterica_serovar_Typhimurium_strain_NC983_chromosome__complete_genome
MAIDENKQKALAAALGQIEKQFGKGSIMRLGEDRSMDVETISTGSLSLDIALGAGGLPMG
RIVEIYGPESSGKTTLTLQVIAAAQREGKTCAFIDAEHALDPVYARKLGVDIDNLLCSQP
DTGEQALEICDALARSGAVDVIVVDSVAALTPKAEIEGEIGDSHMGLAARMMSQAMRKLA
GNLKQSNTLLIFINQIRMKIGVMFGNPETTTGGNALKFYASVRLDIRRIGAVKEGDNVVG
SETRVKVVKNKIAAPFKQAEFQILYGEGINFYGELVDLGVKEKLIEKAGAWYSYNGEKIG
QGKANATTWLKENPATAKEIEKRVRELLLSNQNATPDFAVDDS--EGVAETNEDF--
>Salmonella_enterica_subsp._enterica_serovar_Anatum_str._USDA-ARS-USMARC-1736_chromosome__complete_genome
MAIDENKQKALAAALGQIEKQFGKGSIMRLGEDRSMDVETISTGSLSLDIALGAGGLPMG
RIVEIYGPESSGKTTLTLQVIAAAQREGKTCAFIDAEHALDPVYARKLGVDIDNLLCSQP
DTGEQALEICDALARSGAVDVIVVDSVAALTPKAEIEGEIGDSHMGLAARMMSQAMRKLA
GNLKQSNTLLIFINQIRMKIGVMFGNPETTTGGNALKFYASVRLDIRRIGAVKEGDNVVG
SETRVKVVKNKIAAPFKQAEFQILYGEGINFYGELVDLGVKEKLIEKAGAWYSYNGEKIG
QGKANATTWLKENPATAKEIEKRVRELLLSNQNATPDFAVDDS--EGVAETNEDF--
>Salmonella_enterica_subsp._enterica_serovar_Paratyphi_B_str._SPB7__complete_genome
MAIDENKQKALAAALGQIEKQFGKGSIMRLGEDRSMDVETISTGSLSLDIALGAGGLPMG
RIVEIYGPESSGKTTLTLQVIAAAQREGKTCAFIDAEHALDPVYARKLGVDIDNLLCSQP
DTGEQALEICDALARSGAVDVIVVDSVAALTPKAEIEGEIGDSHMGLAARMMSQAMRKLA
GNLKQSNTLLIFINQIRMKIGVMFGNPETTTGGNALKFYASVRLDIRRIGAVKEGDNVVG
SETRVKVVKNKIAAPFKQAEFQILYGEGINFYGELVDLGVKEKLIEKAGAWYSYNGEKIG
QGKANATTWLKENPATAKEIEKRVRELLLSNQNATPDFAVDDS--EGVAETNEDF--
>Salmonella_enterica_subsp._enterica_serovar_Montevideo_strain_FCC0123_chromosome__complete_genome
MAIDENKQKALAAALGQIEKQFGKGSIMRLGEDRSMDVETISTGSLSLDIALGAGGLPMG
RIVEIYGPESSGKTTLTLQVIAAAQREGKTCAFIDAEHALDPVYARKLGVDIDNLLCSQP
DTGEQALEICDALARSGAVDVIVVDSVAALTPKAEIEGEIGDSHMGLAARMMSQAMRKLA
GNLKQSNTLLIFINQIRMKIGVMFGNPETTTGGNALKFYASVRLDIRRIGAVKEGDNVVG
SETRVKVVKNKIAAPFKQAEFQILYGEGINFYGELVDLGVKEKLIEKAGAWYSYNGEKIG
QGKANATTWLKENPATAKEIEKRVRELLLSNQNATPDFAVDDS--EGVAETNEDF--
>Salmonella_enterica_strain_CFSAN045763_chromosome__complete_genome
MAIDENKQKALAAALGQIEKQFGKGSIMRLGEDRSMDVETISTGSLSLDIALGAGGLPMG
RIVEIYGPESSGKTTLTLQVIAAAQREGKTCAFIDAEHALDPVYARKLGVDIDNLLCSQP
DTGEQALEICDALARSGAVDVIVVDSVAALTPKAEIEGEIGDSHMGLAARMMSQAMRKLA
GNLKQSNTLLIFINQIRMKIGVMFGNPETTTGGNALKFYASVRLDIRRIGAVKEGDNVVG
SETRVKVVKNKIAAPFKQAEFQILYGEGINFYGELVDLGVKEKLIEKAGAWYSYNGEKIG
QGKANATTWLKENPATAKEIEKRVRELLLSNQNATPDFAVDDS--EGVAETNEDF--
>Salmonella_enterica_subsp._enterica_serovar_Djakarta_str._S-1087_chromosome__complete_genome
MAIDENKQKALAAALGQIEKQFGKGSIMRLGEDRSMDVETISTGSLSLDIALGAGGLPMG
RIVEIYGPESSGKTTLTLQVIAAAQREGKTCAFIDAEHALDPVYARKLGVDIDNLLCSQP
DTGEQALEICDALARSGAVDVIVVDSVAALTPKAEIEGEIGDSHMGLAARMMSQAMRKLA
GNLKQSNTLLIFINQIRMKIGVMFGNPETTTGGNALKFYASVRLDIRRIGAVKEGDNVVG
SETRVKVVKNKIAAPFKQAEFQILYGEGINFYGELVDLGVKEKLIEKAGAWYSYNGEKIG
QGKANATTWLKENPATAKEIEKRVRELLLSNQNATPDFAVDDS--EGVAETNEDF--
>Salmonella_enterica_subsp._enterica_serovar_Newport_str._USDA-ARS-USMARC-1924_chromosome__complete_genome
MAIDENKQKALAAALGQIEKQFGKGSIMRLGEDRSMDVETISTGSLSLDIALGAGGLPMG
RIVEIYGPESSGKTTLTLQVIAAAQREGKTCAFIDAEHALDPVYARKLGVDIDNLLCSQP
DTGEQALEICDALARSGAVDVIVVDSVAALTPKAEIEGEIGDSHMGLAARMMSQAMRKLA
GNLKQSNTLLIFINQIRMKIGVMFGNPETTTGGNALKFYASVRLDIRRIGAVKEGDNVVG
SETRVKVVKNKIAAPFKQAEFQILYGEGINFYGELVDLGVKEKLIEKAGAWYSYNGEKIG
QGKANATTWLKENPATAKEIEKRVRELLLSNQNATPDFAVDDS--EGVAETNEDF--
>Salmonella_enterica_strain_CFSAN096147_chromosome__complete_genome
MAIDENKQKALAAALGQIEKQFGKGSIMRLGEDRSMDVETISTGSLSLDIALGAGGLPMG
RIVEIYGPESSGKTTLTLQVIAAAQREGKTCAFIDAEHALDPVYARKLGVDIDNLLCSQP
DTGEQALEICDALARSGAVDVIVVDSVAALTPKAEIEGEIGDSHMGLAARMMSQAMRKLA
GNLKQSNTLLIFINQIRMKIGVMFGNPETTTGGNALKFYASVRLDIRRIGAVKEGDNVVG
SETRVKVVKNKIAAPFKQAEFQILYGEGINFYGELVDLGVKEKLIEKAGAWYSYNGEKIG
QGKANATTWLKENPATAKEIEKRVRELLLSNQNATPDFAVDDS--EGVAETNEDF--
>Salmonella_enterica_subsp._enterica_serovar_Albany_strain_sg_wt5_chromosome__complete_genome
MAIDENKQKALAAALGQIEKQFGKGSIMRLGEDRSMDVETISTGSLSLDIALGAGGLPMG
RIVEIYGPESSGKTTLTLQVIAAAQREGKTCAFIDAEHALDPVYARKLGVDIDNLLCSQP
DTGEQALEICDALARSGAVDVIVVDSVAALTPKAEIEGEIGDSHMGLAARMMSQAMRKLA
GNLKQSNTLLIFINQIRMKIGVMFGNPETTTGGNALKFYASVRLDIRRIGAVKEGDNVVG
SETRVKVVKNKIAAPFKQAEFQILYGEGINFYGELVDLGVKEKLIEKAGAWYSYNGEKIG
QGKANATTWLKENPATAKEIEKRVRELLLSNQNATPDFAVDDS--EGVAETNEDF--
>Salmonella_enterica_subsp._enterica_serovar_Typhi_strain_343078_256191_chromosome__complete_genome
MAIDENKQKALAAALGQIEKQFGKGSIMRLGEDRSMDVETISTGSLSLDIALGAGGLPMG
RIVEIYGPESSGKTTLTLQVIAAAQREGKTCAFIDAEHALDPVYARKLGVDIDNLLCSQP
DTGEQALEICDALARSGAVDVIVVDSVAALTPKAEIEGEIGDSHMGLAARMMSQAMRKLA
GNLKQSNTLLIFINQIRMKIGVMFGNPETTTGGNALKFYASVRLDIRRIGAVKEGDNVVG
SETRVKVVKNKIAAPFKQAEFQILYGEGINFYGELVDLGVKEKLIEKAGAWYSYNGEKIG
QGKANATTWLKENPATAKEIEKRVRELLLSNQNATPDFAVDDS--EGVAETNEDF--
>Salmonella_enterica_subsp._enterica_strain_15-SA01028_chromosome__complete_genome
MAIDENKQKALAAALGQIEKQFGKGSIMRLGEDRSMDVETISTGSLSLDIALGAGGLPMG
RIVEIYGPESSGKTTLTLQVIAAAQREGKTCAFIDAEHALDPVYARKLGVDIDNLLCSQP
DTGEQALEICDALARSGAVDVIVVDSVAALTPKAEIEGEIGDSHMGLAARMMSQAMRKLA
GNLKQSNTLLIFINQIRMKIGVMFGNPETTTGGNALKFYASVRLDIRRIGAVKEGDNVVG
SETRVKVVKNKIAAPFKQAEFQILYGEGINFYGELVDLGVKEKLIEKAGAWYSYNGEKIG
QGKANATTWLKENPATAKEIEKRVRELLLSNQNATPDFAVDDS--EGVAETNEDF--
>Salmonella_enterica_subsp._enterica_strain_CFSAN087304_chromosome__complete_genome
MAIDENKQKALAAALGQIEKQFGKGSIMRLGEDRSMDVETISTGSLSLDIALGAGGLPMG
RIVEIYGPESSGKTTLTLQVIAAAQREGKTCAFIDAEHALDPVYARKLGVDIDNLLCSQP
DTGEQALEICDALARSGAVDVIVVDSVAALTPKAEIEGEIGDSHMGLAARMMSQAMRKLA
GNLKQSNTLLIFINQIRMKIGVMFGNPETTTGGNALKFYASVRLDIRRIGAVKEGDNVVG
SETRVKVVKNKIAAPFKQAEFQILYGEGINFYGELVDLGVKEKLIEKAGAWYSYNGEKIG
QGKANATTWLKENPATAKEIEKRVRELLLSNQNATPDFAVDDS--EGVAETNEDF--
>Salmonella_enterica_subsp._enterica_serovar_Stanleyville_strain_RSE39_chromosome__complete_genome
MAIDENKQKALAAALGQIEKQFGKGSIMRLGEDRSMDVETISTGSLSLDIALGAGGLPMG
RIVEIYGPESSGKTTLTLQVIAAAQREGKTCAFIDAEHALDPVYARKLGVDIDNLLCSQP
DTGEQALEICDALARSGAVDVIVVDSVAALTPKAEIEGEIGDSHMGLAARMMSQAMRKLA
GNLKQSNTLLIFINQIRMKIGVMFGNPETTTGGNALKFYASVRLDIRRIGAVKEGDNVVG
SETRVKVVKNKIAAPFKQAEFQILYGEGINFYGELVDLGVKEKLIEKAGAWYSYNGEKIG
QGKANATTWLKENPATAKEIEKRVRELLLSNQNATPDFAVDDS--EGVAETNEDF--
>Salmonella_enterica_subsp._enterica_serovar_Typhimurium_strain_ATCC_13311__complete_genome
MAIDENKQKALAAALGQIEKQFGKGSIMRLGEDRSMDVETISTGSLSLDIALGAGGLPMG
RIVEIYGPESSGKTTLTLQVIAAAQREGKTCAFIDAEHALDPVYARKLGVDIDNLLCSQP
DTGEQALEICDALARSGAVDVIVVDSVAALTPKAEIEGEIGDSHMGLAARMMSQAMRKLA
GNLKQSNTLLIFINQIRMKIGVMFGNPETTTGGNALKFYASVRLDIRRIGAVKEGDNVVG
SETRVKVVKNKIAAPFKQAEFQILYGEGINFYGELVDLGVKEKLIEKAGAWYSYNGEKIG
QGKANATTWLKENPATAKEIEKRVRELLLSNQNATPDFAVDDS--EGVAETNEDF--
>Salmonella_enterica_subsp._enterica_serovar_Newport_str._USDA-ARS-USMARC-1926_chromosome__complete_genome
MAIDENKQKALAAALGQIEKQFGKGSIMRLGEDRSMDVETISTGSLSLDIALGAGGLPMG
RIVEIYGPESSGKTTLTLQVIAAAQREGKTCAFIDAEHALDPVYARKLGVDIDNLLCSQP
DTGEQALEICDALARSGAVDVIVVDSVAALTPKAEIEGEIGDSHMGLAARMMSQAMRKLA
GNLKQSNTLLIFINQIRMKIGVMFGNPETTTGGNALKFYASVRLDIRRIGAVKEGDNVVG
SETRVKVVKNKIAAPFKQAEFQILYGEGINFYGELVDLGVKEKLIEKAGAWYSYNGEKIG
QGKANATTWLKENPATAKEIEKRVRELLLSNQNATPDFAVDDS--EGVAETNEDF--
>Salmonella_enterica_subsp._enterica_serovar_Newport_str._CVM_N18486__complete_genome
MAIDENKQKALAAALGQIEKQFGKGSIMRLGEDRSMDVETISTGSLSLDIALGAGGLPMG
RIVEIYGPESSGKTTLTLQVIAAAQREGKTCAFIDAEHALDPVYARKLGVDIDNLLCSQP
DTGEQALEICDALARSGAVDVIVVDSVAALTPKAEIEGEIGDSHMGLAARMMSQAMRKLA
GNLKQSNTLLIFINQIRMKIGVMFGNPETTTGGNALKFYASVRLDIRRIGAVKEGDNVVG
SETRVKVVKNKIAAPFKQAEFQILYGEGINFYGELVDLGVKEKLIEKAGAWYSYNGEKIG
QGKANATTWLKENPATAKEIEKRVRELLLSNQNATPDFAVDDS--EGVAETNEDF--
>Salmonella_enterica_subsp._enterica_serovar_Heidelberg_strain_5_chromosome__complete_genome
MAIDENKQKALAAALGQIEKQFGKGSIMRLGEDRSMDVETISTGSLSLDIALGAGGLPMG
RIVEIYGPESSGKTTLTLQVIAAAQREGKTCAFIDAEHALDPVYARKLGVDIDNLLCSQP
DTGEQALEICDALARSGAVDVIVVDSVAALTPKAEIEGEIGDSHMGLAARMMSQAMRKLA
GNLKQSNTLLIFINQIRMKIGVMFGNPETTTGGNALKFYASVRLDIRRIGAVKEGDNVVG
SETRVKVVKNKIAAPFKQAEFQILYGEGINFYGELVDLGVKEKLIEKAGAWYSYNGEKIG
QGKANATTWLKENPATAKEIEKRVRELLLSNQNATPDFAVDDS--EGVAETNEDF--
>Salmonella_enterica_subsp._enterica_serovar_Newport_str._CDC_2009K-1331_chromosome__complete_genome
MAIDENKQKALAAALGQIEKQFGKGSIMRLGEDRSMDVETISTGSLSLDIALGAGGLPMG
RIVEIYGPESSGKTTLTLQVIAAAQREGKTCAFIDAEHALDPVYARKLGVDIDNLLCSQP
DTGEQALEICDALARSGAVDVIVVDSVAALTPKAEIEGEIGDSHMGLAARMMSQAMRKLA
GNLKQSNTLLIFINQIRMKIGVMFGNPETTTGGNALKFYASVRLDIRRIGAVKEGDNVVG
SETRVKVVKNKIAAPFKQAEFQILYGEGINFYGELVDLGVKEKLIEKAGAWYSYNGEKIG
QGKANATTWLKENPATAKEIEKRVRELLLSNQNATPDFAVDDS--EGVAETNEDF--
>Salmonella_enterica_subsp._enterica_serovar_Typhimurium_str._T000240_DNA__complete_genome
MAIDENKQKALAAALGQIEKQFGKGSIMRLGEDRSMDVETISTGSLSLDIALGAGGLPMG
RIVEIYGPESSGKTTLTLQVIAAAQREGKTCAFIDAEHALDPVYARKLGVDIDNLLCSQP
DTGEQALEICDALARSGAVDVIVVDSVAALTPKAEIEGEIGDSHMGLAARMMSQAMRKLA
GNLKQSNTLLIFINQIRMKIGVMFGNPETTTGGNALKFYASVRLDIRRIGAVKEGDNVVG
SETRVKVVKNKIAAPFKQAEFQILYGEGINFYGELVDLGVKEKLIEKAGAWYSYNGEKIG
QGKANATTWLKENPATAKEIEKRVRELLLSNQNATPDFAVDDS--EGVAETNEDF--
>Salmonella_enterica_subsp._enterica_strain_0803_MR1_chromosome__complete_genome
MAIDENKQKALAAALGQIEKQFGKGSIMRLGEDRSMDVETISTGSLSLDIALGAGGLPMG
RIVEIYGPESSGKTTLTLQVIAAAQREGKTCAFIDAEHALDPVYARKLGVDIDNLLCSQP
DTGEQALEICDALARSGAVDVIVVDSVAALTPKAEIEGEIGDSHMGLAARMMSQAMRKLA
GNLKQSNTLLIFINQIRMKIGVMFGNPETTTGGNALKFYASVRLDIRRIGAVKEGDNVVG
SETRVKVVKNKIAAPFKQAEFQILYGEGINFYGELVDLGVKEKLIEKAGAWYSYNGEKIG
QGKANATTWLKENPATAKEIEKRVRELLLSNQNATPDFAVDDS--EGVAETNEDF--
>Salmonella_enterica_subsp._enterica_serovar_Enteritidis_str._P125109_complete_genome
MAIDENKQKALAAALGQIEKQFGKGSIMRLGEDRSMDVETISTGSLSLDIALGAGGLPMG
RIVEIYGPESSGKTTLTLQVIAAAQREGKTCAFIDAEHALDPVYARKLGVDIDNLLCSQP
DTGEQALEICDALARSGAVDVIVVDSVAALTPKAEIEGEIGDSHMGLAARMMSQAMRKLA
GNLKQSNTLLIFINQIRMKIGVMFGNPETTTGGNALKFYASVRLDIRRIGAVKEGDNVVG
SETRVKVVKNKIAAPFKQAEFQILYGEGINFYGELVDLGVKEKLIEKAGAWYSYNGEKIG
QGKANATTWLKENPATAKEIEKRVRELLLSNQNATPDFAVDDS--EGVAETNEDF--
>Salmonella_enterica_subsp._enterica_serovar_Cerro_strain_87__complete_genome
MAIDENKQKALAAALGQIEKQFGKGSIMRLGEDRSMDVETISTGSLSLDIALGAGGLPMG
RIVEIYGPESSGKTTLTLQVIAAAQREGKTCAFIDAEHALDPVYARKLGVDIDNLLCSQP
DTGEQALEICDALARSGAVDVIVVDSVAALTPKAEIEGEIGDSHMGLAARMMSQAMRKLA
GNLKQSNTLLIFINQIRMKIGVMFGNPETTTGGNALKFYASVRLDIRRIGAVKEGDNVVG
SETRVKVVKNKIAAPFKQAEFQILYGEGINFYGELVDLGVKEKLIEKAGAWYSYNGEKIG
QGKANATTWLKENPATAKEIEKRVRELLLSNQNATPDFAVDDS--EGVAETNEDF--
>Salmonella_enterica_subsp._enterica_serovar_Borreze_str._SA20041063_chromosome__complete_genome
MAIDENKQKALAAALGQIEKQFGKGSIMRLGEDRSMDVETISTGSLSLDIALGAGGLPMG
RIVEIYGPESSGKTTLTLQVIAAAQREGKTCAFIDAEHALDPVYARKLGVDIDNLLCSQP
DTGEQALEICDALARSGAVDVIVVDSVAALTPKAEIEGEIGDSHMGLAARMMSQAMRKLA
GNLKQSNTLLIFINQIRMKIGVMFGNPETTTGGNALKFYASVRLDIRRIGAVKEGDNVVG
SETRVKVVKNKIAAPFKQAEFQILYGEGINFYGELVDLGVKEKLIEKAGAWYSYNGEKIG
QGKANATTWLKENPATAKEIEKRVRELLLSNQNATPDFAVDDS--EGVAETNEDF--
>Salmonella_enterica_subsp._enterica_serovar_Newport_str._CDC_2012K-0938_chromosome__complete_genome
MAIDENKQKALAAALGQIEKQFGKGSIMRLGEDRSMDVETISTGSLSLDIALGAGGLPMG
RIVEIYGPESSGKTTLTLQVIAAAQREGKTCAFIDAEHALDPVYARKLGVDIDNLLCSQP
DTGEQALEICDALARSGAVDVIVVDSVAALTPKAEIEGEIGDSHMGLAARMMSQAMRKLA
GNLKQSNTLLIFINQIRMKIGVMFGNPETTTGGNALKFYASVRLDIRRIGAVKEGDNVVG
SETRVKVVKNKIAAPFKQAEFQILYGEGINFYGELVDLGVKEKLIEKAGAWYSYNGEKIG
QGKANATTWLKENPATAKEIEKRVRELLLSNQNATPDFAVDDS--EGVAETNEDF--
>Salmonella_enterica_subsp._enterica_strain_17437230_chromosome__complete_genome
MAIDENKQKALAAALGQIEKQFGKGSIMRLGEDRSMDVETISTGSLSLDIALGAGGLPMG
RIVEIYGPESSGKTTLTLQVIAAAQREGKTCAFIDAEHALDPVYARKLGVDIDNLLCSQP
DTGEQALEICDALARSGAVDVIVVDSVAALTPKAEIEGEIGDSHMGLAARMMSQAMRKLA
GNLKQSNTLLIFINQIRMKIGVMFGNPETTTGGNALKFYASVRLDIRRIGAVKEGDNVVG
SETRVKVVKNKIAAPFKQAEFQILYGEGINFYGELVDLGVKEKLIEKAGAWYSYNGEKIG
QGKANATTWLKENPATAKEIEKRVRELLLSNQNATPDFAVDDS--EGVAETNEDF--
>Salmonella_enterica_subsp._enterica_serovar_Brandenburg_strain_SA20113174_chromosome__complete_genome
MAIDENKQKALAAALGQIEKQFGKGSIMRLGEDRSMDVETISTGSLSLDIALGAGGLPMG
RIVEIYGPESSGKTTLTLQVIAAAQREGKTCAFIDAEHALDPVYARKLGVDIDNLLCSQP
DTGEQALEICDALARSGAVDVIVVDSVAALTPKAEIEGEIGDSHMGLAARMMSQAMRKLA
GNLKQSNTLLIFINQIRMKIGVMFGNPETTTGGNALKFYASVRLDIRRIGAVKEGDNVVG
SETRVKVVKNKIAAPFKQAEFQILYGEGINFYGELVDLGVKEKLIEKAGAWYSYNGEKIG
QGKANATTWLKENPATAKEIEKRVRELLLSNQNATPDFAVDDS--EGVAETNEDF--
>Salmonella_enterica_subsp._enterica_serovar_Typhimurium_strain_11A0003616_chromosome__complete_genome
MAIDENKQKALAAALGQIEKQFGKGSIMRLGEDRSMDVETISTGSLSLDIALGAGGLPMG
RIVEIYGPESSGKTTLTLQVIAAAQREGKTCAFIDAEHALDPVYARKLGVDIDNLLCSQP
DTGEQALEICDALARSGAVDVIVVDSVAALTPKAEIEGEIGDSHMGLAARMMSQAMRKLA
GNLKQSNTLLIFINQIRMKIGVMFGNPETTTGGNALKFYASVRLDIRRIGAVKEGDNVVG
SETRVKVVKNKIAAPFKQAEFQILYGEGINFYGELVDLGVKEKLIEKAGAWYSYNGEKIG
QGKANATTWLKENPATAKEIEKRVRELLLSNQNATPDFAVDDS--EGVAETNEDF--
>Salmonella_enterica_subsp._enterica_serovar_Heidelberg_strain_CE-R2-11-0435_chromosome__complete_genome
MAIDENKQKALAAALGQIEKQFGKGSIMRLGEDRSMDVETISTGSLSLDIALGAGGLPMG
RIVEIYGPESSGKTTLTLQVIAAAQREGKTCAFIDAEHALDPVYARKLGVDIDNLLCSQP
DTGEQALEICDALARSGAVDVIVVDSVAALTPKAEIEGEIGDSHMGLAARMMSQAMRKLA
GNLKQSNTLLIFINQIRMKIGVMFGNPETTTGGNALKFYASVRLDIRRIGAVKEGDNVVG
SETRVKVVKNKIAAPFKQAEFQILYGEGINFYGELVDLGVKEKLIEKAGAWYSYNGEKIG
QGKANATTWLKENPATAKEIEKRVRELLLSNQNATPDFAVDDS--EGVAETNEDF--
>Salmonella_enterica_subsp._enterica_serovar_Muenster_strain_PJM1_chromosome__complete_genome
MAIDENKQKALAAALGQIEKQFGKGSIMRLGEDRSMDVETISTGSLSLDIALGAGGLPMG
RIVEIYGPESSGKTTLTLQVIAAAQREGKTCAFIDAEHALDPVYARKLGVDIDNLLCSQP
DTGEQALEICDALARSGAVDVIVVDSVAALTPKAEIEGEIGDSHMGLAARMMSQAMRKLA
GNLKQSNTLLIFINQIRMKIGVMFGNPETTTGGNALKFYASVRLDIRRIGAVKEGDNVVG
SETRVKVVKNKIAAPFKQAEFQILYGEGINFYGELVDLGVKEKLIEKAGAWYSYNGEKIG
QGKANATTWLKENPATAKEIEKRVRELLLSNQNATPDFAVDDS--EGVAETNEDF--
>Salmonella_enterica_subsp._enterica_serovar_Enteritidis_strain_OLF-SE9-10012__complete_genome
MAIDENKQKALAAALGQIEKQFGKGSIMRLGEDRSMDVETISTGSLSLDIALGAGGLPMG
RIVEIYGPESSGKTTLTLQVIAAAQREGKTCAFIDAEHALDPVYARKLGVDIDNLLCSQP
DTGEQALEICDALARSGAVDVIVVDSVAALTPKAEIEGEIGDSHMGLAARMMSQAMRKLA
GNLKQSNTLLIFINQIRMKIGVMFGNPETTTGGNALKFYASVRLDIRRIGAVKEGDNVVG
SETRVKVVKNKIAAPFKQAEFQILYGEGINFYGELVDLGVKEKLIEKAGAWYSYNGEKIG
QGKANATTWLKENPATAKEIEKRVRELLLSNQNATPDFAVDDS--EGVAETNEDF--
>Salmonella_enterica_subsp._enterica_serovar_Bergen_str._ST350_chromosome__complete_genome
MAIDENKQKALAAALGQIEKQFGKGSIMRLGEDRSMDVETISTGSLSLDIALGAGGLPMG
RIVEIYGPESSGKTTLTLQVIAAAQREGKTCAFIDAEHALDPVYARKLGVDIDNLLCSQP
DTGEQALEICDALARSGAVDVIVVDSVAALTPKAEIEGEIGDSHMGLAARMMSQAMRKLA
GNLKQSNTLLIFINQIRMKIGVMFGNPETTTGGNALKFYASVRLDIRRIGAVKEGDNVVG
SETRVKVVKNKIAAPFKQAEFQILYGEGINFYGELVDLGVKEKLIEKAGAWYSYNGEKIG
QGKANATTWLKENPATAKEIEKRVRELLLSNQNATPDFAVDDS--EGVAETNEDF--
>Salmonella_enterica_subsp._enterica_serovar_Paratyphi_A_strain_CMCC_50503__complete_genome
MAIDENKQKALAAAMGQIEKQFGKGSIMRLGEDRSMDVETISTGSLSLDIALGAGGLPMG
RIVEIYGPESSGKTTLTLQVIAAAQREGKTCAFIDAEHALDPVYARKLGVDIDNLLCSQP
DTGEQALEICDALARSGAVDVIVVDSVAALTPKAEIEGEIGDSHMGLAARMMSQAMRKLA
GNLKQSNTLLIFINQIRMKIGVMFGNPETTTGGNALKFYASVRLDIRRIGAVKEGDNVVG
SETRVKVVKNKIAAPFKQAEFQILYGEGINFYGELVDLGVKEKLIEKAGAWYSYNGEKIG
QGKANATTWLKENPATAKEIEKRVRELLLSNQNATPDFAVDDS--EGVAETNEDF--
>Salmonella_enterica_subsp._enterica_serovar_Paratyphi_A_strain_CMCC_50973__complete_genome
MAIDENKQKALAAAMGQIEKQFGKGSIMRLGEDRSMDVETISTGSLSLDIALGAGGLPMG
RIVEIYGPESSGKTTLTLQVIAAAQREGKTCAFIDAEHALDPVYARKLGVDIDNLLCSQP
DTGEQALEICDALARSGAVDVIVVDSVAALTPKAEIEGEIGDSHMGLAARMMSQAMRKLA
GNLKQSNTLLIFINQIRMKIGVMFGNPETTTGGNALKFYASVRLDIRRIGAVKEGDNVVG
SETRVKVVKNKIAAPFKQAEFQILYGEGINFYGELVDLGVKEKLIEKAGAWYSYNGEKIG
QGKANATTWLKENPATAKEIEKRVRELLLSNQNATPDFAVDDS--EGVAETNEDF--
>Salmonella_enterica_subsp._enterica_serovar_Paratyphi_A_strain_FDAARGOS_368_chromosome__complete_genome
MAIDENKQKALAAAMGQIEKQFGKGSIMRLGEDRSMDVETISTGSLSLDIALGAGGLPMG
RIVEIYGPESSGKTTLTLQVIAAAQREGKTCAFIDAEHALDPVYARKLGVDIDNLLCSQP
DTGEQALEICDALARSGAVDVIVVDSVAALTPKAEIEGEIGDSHMGLAARMMSQAMRKLA
GNLKQSNTLLIFINQIRMKIGVMFGNPETTTGGNALKFYASVRLDIRRIGAVKEGDNVVG
SETRVKVVKNKIAAPFKQAEFQILYGEGINFYGELVDLGVKEKLIEKAGAWYSYNGEKIG
QGKANATTWLKENPATAKEIEKRVRELLLSNQNATPDFAVDDS--EGVAETNEDF--
>Salmonella_enterica_subsp._enterica_serovar_Paratyphi_A_str._ATCC_11511__complete_genome
MAIDENKQKALAAAMGQIEKQFGKGSIMRLGEDRSMDVETISTGSLSLDIALGAGGLPMG
RIVEIYGPESSGKTTLTLQVIAAAQREGKTCAFIDAEHALDPVYARKLGVDIDNLLCSQP
DTGEQALEICDALARSGAVDVIVVDSVAALTPKAEIEGEIGDSHMGLAARMMSQAMRKLA
GNLKQSNTLLIFINQIRMKIGVMFGNPETTTGGNALKFYASVRLDIRRIGAVKEGDNVVG
SETRVKVVKNKIAAPFKQAEFQILYGEGINFYGELVDLGVKEKLIEKAGAWYSYNGEKIG
QGKANATTWLKENPATAKEIEKRVRELLLSNQNATPDFAVDDS--EGVAETNEDF--
>Salmonella_enterica_subsp._enterica_serovar_Paratyphi_A_str._ATCC_9150__complete_genome
MAIDENKQKALAAAMGQIEKQFGKGSIMRLGEDRSMDVETISTGSLSLDIALGAGGLPMG
RIVEIYGPESSGKTTLTLQVIAAAQREGKTCAFIDAEHALDPVYARKLGVDIDNLLCSQP
DTGEQALEICDALARSGAVDVIVVDSVAALTPKAEIEGEIGDSHMGLAARMMSQAMRKLA
GNLKQSNTLLIFINQIRMKIGVMFGNPETTTGGNALKFYASVRLDIRRIGAVKEGDNVVG
SETRVKVVKNKIAAPFKQAEFQILYGEGINFYGELVDLGVKEKLIEKAGAWYSYNGEKIG
QGKANATTWLKENPATAKEIEKRVRELLLSNQNATPDFAVDDS--EGVAETNEDF--
>Salmonella_enterica_subsp._enterica_serovar_Paratyphi_A_str._AKU_12601_complete_genome__strain_AKU_12601
MAIDENKQKALAAAMGQIEKQFGKGSIMRLGEDRSMDVETISTGSLSLDIALGAGGLPMG
RIVEIYGPESSGKTTLTLQVIAAAQREGKTCAFIDAEHALDPVYARKLGVDIDNLLCSQP
DTGEQALEICDALARSGAVDVIVVDSVAALTPKAEIEGEIGDSHMGLAARMMSQAMRKLA
GNLKQSNTLLIFINQIRMKIGVMFGNPETTTGGNALKFYASVRLDIRRIGAVKEGDNVVG
SETRVKVVKNKIAAPFKQAEFQILYGEGINFYGELVDLGVKEKLIEKAGAWYSYNGEKIG
QGKANATTWLKENPATAKEIEKRVRELLLSNQNATPDFAVDDS--EGVAETNEDF--
>Salmonella_enterica_subsp._enterica_strain_CFSA664_chromosome__complete_genome
MAIDENKQKALAAALGQIEKQFGKGSIMRLGEDRSMDVETISTGSLSLDIALGAGGLPMG
RIVEIYGPESSGKTTLTLQVIAAAQREGKTCAFIDAEHALDPVYARKLGVDIDNLLCSQP
DTGEQALEICDALARSGAVDVIVVDSVAALTPKAEIEGEIGDSHMGLAARMMSQAMRKLA
GNLKQSNTLLIFINQIRMKIGVMFGNPETTTGGNALKFYASVRLDIRRIGAVKEGDNVVG
SETRVKVVKNKIAAPFKQAEFQILYGEGINFYGELVDLGVKEKLIEKAGAWYSYNGEKIG
QGKANATTWLKENPATAKEIEKRVRELLLSNQNATPDFAVDDS--EGVAETNEDF--
>Salmonella_enterica_subsp._enterica_serovar_Typhi_strain_311189_217186_chromosome__complete_genome
MAIDENKQKALAAALGQIEKQFGKGSIMRLGEDRSMDVETISTGSLSLDIALGAGGLPMG
RIVEIYGPESSGKTTLTLQVIAAAQREGKTCAFIDAEHALDPVYARKLGVDIDNLLCSQP
DTGEQALEICDALARSGAVDVIVVDSVAALTPKAEIEGEIGDSHMGLAARMMSQAMRKLA
GNLKQSNTLLIFINQIRMKIGVMFGNPETTTGGNALKFYASVRLDIRRIGAVKEGDNVVG
SETRVKVVKNKIAAPFKQAEFQILYGEGINFYGELVDLGVKEKLIEKAGAWYSYNGEKIG
QGKANATTWLKENPATAKEIEKRVRELLLSNQNATPDFAVDDS--EGVAETNEDF--
>Salmonella_enterica_subsp._enterica_serovar_Heidelberg_str._CFSAN002064__complete_genome
MAIDENKQKALAAALGQIEKQFGKGSIMRLGEDRSMDVETISTGSLSLDIALGAGGLPMG
RIVEIYGPESSGKTTLTLQVIAAAQREGKTCAFIDAEHALDPVYARKLGVDIDNLLCSQP
DTGEQALEICDALARSGAVDVIVVDSVAALTPKAEIEGEIGDSHMGLAARMMSQAMRKLA
GNLKQSNTLLIFINQIRMKIGVMFGNPETTTGGNALKFYASVRLDIRRIGAVKEGDNVVG
SETRVKVVKNKIAAPFKQAEFQILYGEGINFYGELVDLGVKEKLIEKAGAWYSYNGEKIG
QGKANATTWLKENPATAKEIEKRVRELLLSNQNATPDFAVDDS--EGVAETNEDF--
>Salmonella_enterica_subsp._enterica_serovar_Enteritidis_str._EC20090641__complete_genome
MAIDENKQKALAAALGQIEKQFGKGSIMRLGEDRSMDVETISTGSLSLDIALGAGGLPMG
RIVEIYGPESSGKTTLTLQVIAAAQREGKTCAFIDAEHALDPVYARKLGVDIDNLLCSQP
DTGEQALEICDALARSGAVDVIVVDSVAALTPKAEIEGEIGDSHMGLAARMMSQAMRKLA
GNLKQSNTLLIFINQIRMKIGVMFGNPETTTGGNALKFYASVRLDIRRIGAVKEGDNVVG
SETRVKVVKNKIAAPFKQAEFQILYGEGINFYGELVDLGVKEKLIEKAGAWYSYNGEKIG
QGKANATTWLKENPATAKEIEKRVRELLLSNQNATPDFAVDDS--EGVAETNEDF--
>Salmonella_enterica_subsp._enterica_serovar_Newport_str._USMARC-S3124.1__complete_genome
MAIDENKQKALAAALGQIEKQFGKGSIMRLGEDRSMDVETISTGSLSLDIALGAGGLPMG
RIVEIYGPESSGKTTLTLQVIAAAQREGKTCAFIDAEHALDPVYARKLGVDIDNLLCSQP
DTGEQALEICDALARSGAVDVIVVDSVAALTPKAEIEGEIGDSHMGLAARMMSQAMRKLA
GNLKQSNTLLIFINQIRMKIGVMFGNPETTTGGNALKFYASVRLDIRRIGAVKEGDNVVG
SETRVKVVKNKIAAPFKQAEFQILYGEGINFYGELVDLGVKEKLIEKAGAWYSYNGEKIG
QGKANATTWLKENPATAKEIEKRVRELLLSNQNATPDFAVDDS--EGVAETNEDF--
>Salmonella_enterica_subsp._enterica_serovar_Typhimurium_str._D23580_complete_genome
MAIDENKQKALAAALGQIEKQFGKGSIMRLGEDRSMDVETISTGSLSLDIALGAGGLPMG
RIVEIYGPESSGKTTLTLQVIAAAQREGKTCAFIDAEHALDPVYARKLGVDIDNLLCSQP
DTGEQALEICDALARSGAVDVIVVDSVAALTPKAEIEGEIGDSHMGLAARMMSQAMRKLA
GNLKQSNTLLIFINQIRMKIGVMFGNPETTTGGNALKFYASVRLDIRRIGAVKEGDNVVG
SETRVKVVKNKIAAPFKQAEFQILYGEGINFYGELVDLGVKEKLIEKAGAWYSYNGEKIG
QGKANATTWLKENPATAKEIEKRVRELLLSNQNATPDFAVDDS--EGVAETNEDF--
>Salmonella_enterica_subsp._enterica_serovar_Newport_str._CVM_21538__complete_genome
MAIDENKQKALAAALGQIEKQFGKGSIMRLGEDRSMDVETISTGSLSLDIALGAGGLPMG
RIVEIYGPESSGKTTLTLQVIAAAQREGKTCAFIDAEHALDPVYARKLGVDIDNLLCSQP
DTGEQALEICDALARSGAVDVIVVDSVAALTPKAEIEGEIGDSHMGLAARMMSQAMRKLA
GNLKQSNTLLIFINQIRMKIGVMFGNPETTTGGNALKFYASVRLDIRRIGAVKEGDNVVG
SETRVKVVKNKIAAPFKQAEFQILYGEGINFYGELVDLGVKEKLIEKAGAWYSYNGEKIG
QGKANATTWLKENPATAKEIEKRVRELLLSNQNATPDFAVDDS--EGVAETNEDF--
>Salmonella_enterica_subsp._enterica_serovar_Hadar_strain_12-2388_chromosome__complete_genome
MAIDENKQKALAAALGQIEKQFGKGSIMRLGEDRSMDVETISTGSLSLDIALGAGGLPMG
RIVEIYGPESSGKTTLTLQVIAAAQREGKTCAFIDAEHALDPVYARKLGVDIDNLLCSQP
DTGEQALEICDALARSGAVDVIVVDSVAALTPKAEIEGEIGDSHMGLAARMMSQAMRKLA
GNLKQSNTLLIFINQIRMKIGVMFGNPETTTGGNALKFYASVRLDIRRIGAVKEGDNVVG
SETRVKVVKNKIAAPFKQAEFQILYGEGINFYGELVDLGVKEKLIEKAGAWYSYNGEKIG
QGKANATTWLKENPATAKEIEKRVRELLLSNQNATPDFAVDDS--EGVAETNEDF--
>Salmonella_enterica_subsp._enterica_serovar_Typhimurium_strain_FORC_015__complete_genome
MAIDENKQKALAAALGQIEKQFGKGSIMRLGEDRSMDVETISTGSLSLDIALGAGGLPMG
RIVEIYGPESSGKTTLTLQVIAAAQREGKTCAFIDAEHALDPVYARKLGVDIDNLLCSQP
DTGEQALEICDALARSGAVDVIVVDSVAALTPKAEIEGEIGDSHMGLAARMMSQAMRKLA
GNLKQSNTLLIFINQIRMKIGVMFGNPETTTGGNALKFYASVRLDIRRIGAVKEGDNVVG
SETRVKVVKNKIAAPFKQAEFQILYGEGINFYGELVDLGVKEKLIEKAGAWYSYNGEKIG
QGKANATTWLKENPATAKEIEKRVRELLLSNQNATPDFAVDDS--EGVAETNEDF--
>Salmonella_enterica_strain_S61394_chromosome__complete_genome
MAIDENKQKALAAALGQIEKQFGKGSIMRLGEDRSMDVETISTGSLSLDIALGAGGLPMG
RIVEIYGPESSGKTTLTLQVIAAAQREGKTCAFIDAEHALDPVYARKLGVDIDNLLCSQP
DTGEQALEICDALARSGAVDVIVVDSVAALTPKAEIEGEIGDSHMGLAARMMSQAMRKLA
GNLKQSNTLLIFINQIRMKIGVMFGNPETTTGGNALKFYASVRLDIRRIGAVKEGDNVVG
SETRVKVVKNKIAAPFKQAEFQILYGEGINFYGELVDLGVKEKLIEKAGAWYSYNGEKIG
QGKANATTWLKENPATAKEIEKRVRELLLSNQNATPDFAVDDS--EGVAETNEDF--
>Salmonella_enterica_subsp._enterica_strain_1344399_chromosome__complete_genome
MAIDENKQKALAAALGQIEKQFGKGSIMRLGEDRSMDVETISTGSLSLDIALGAGGLPMG
RIVEIYGPESSGKTTLTLQVIAAAQREGKTCAFIDAEHALDPVYARKLGVDIDNLLCSQP
DTGEQALEICDALARSGAVDVIVVDSVAALTPKAEIEGEIGDSHMGLAARMMSQAMRKLA
GNLKQSNTLLIFINQIRMKIGVMFGNPETTTGGNALKFYASVRLDIRRIGAVKEGDNVVG
SETRVKVVKNKIAAPFKQAEFQILYGEGINFYGELVDLGVKEKLIEKAGAWYSYNGEKIG
QGKANATTWLKENPATAKEIEKRVRELLLSNQNATPDFAVDDS--EGVAETNEDF--
>Salmonella_enterica_strain_S44712_chromosome__complete_genome
MAIDENKQKALAAALGQIEKQFGKGSIMRLGEDRSMDVETISTGSLSLDIALGAGGLPMG
RIVEIYGPESSGKTTLTLQVIAAAQREGKTCAFIDAEHALDPVYARKLGVDIDNLLCSQP
DTGEQALEICDALARSGAVDVIVVDSVAALTPKAEIEGEIGDSHMGLAARMMSQAMRKLA
GNLKQSNTLLIFINQIRMKIGVMFGNPETTTGGNALKFYASVRLDIRRIGAVKEGDNVVG
SETRVKVVKNKIAAPFKQAEFQILYGEGINFYGELVDLGVKEKLIEKAGAWYSYNGEKIG
QGKANATTWLKENPATAKEIEKRVRELLLSNQNATPDFAVDDS--EGVAETNEDF--
>Salmonella_enterica_subsp._enterica_serovar_Indiana_strain_JT_01_chromosome__complete_genome
MAIDENKQKALAAALGQIEKQFGKGSIMRLGEDRSMDVETISTGSLSLDIALGAGGLPMG
RIVEIYGPESSGKTTLTLQVIAAAQREGKTCAFIDAEHALDPVYARKLGVDIDNLLCSQP
DTGEQALEICDALARSGAVDVIVVDSVAALTPKAEIEGEIGDSHMGLAARMMSQAMRKLA
GNLKQSNTLLIFINQIRMKIGVMFGNPETTTGGNALKFYASVRLDIRRIGAVKEGDNVVG
SETRVKVVKNKIAAPFKQAEFQILYGEGINFYGELVDLGVKEKLIEKAGAWYSYNGEKIG
QGKANATTWLKENPATAKEIEKRVRELLLSNQNATPDFAVDDS--EGVAETNEDF--
>Salmonella_enterica_subsp._enterica_serovar_Tennessee_str._TXSC_TXSC08-19__complete_genome
MAIDENKQKALAAALGQIEKQFGKGSIMRLGEDRSMDVETISTGSLSLDIALGAGGLPMG
RIVEIYGPESSGKTTLTLQVIAAAQREGKTCAFIDAEHALDPVYARKLGVDIDNLLCSQP
DTGEQALEICDALARSGAVDVIVVDSVAALTPKAEIEGEIGDSHMGLAARMMSQAMRKLA
GNLKQSNTLLIFINQIRMKIGVMFGNPETTTGGNALKFYASVRLDIRRIGAVKEGDNVVG
SETRVKVVKNKIAAPFKQAEFQILYGEGINFYGELVDLGVKEKLIEKAGAWYSYNGEKIG
QGKANATTWLKENPATAKEIEKRVRELLLSNQNATPDFAVDDS--EGVAETNEDF--
>Salmonella_enterica_subsp._enterica_serovar_Newport_str._CVM_22462__complete_genome
MAIDENKQKALAAALGQIEKQFGKGSIMRLGEDRSMDVETISTGSLSLDIALGAGGLPMG
RIVEIYGPESSGKTTLTLQVIAAAQREGKTCAFIDAEHALDPVYARKLGVDIDNLLCSQP
DTGEQALEICDALARSGAVDVIVVDSVAALTPKAEIEGEIGDSHMGLAARMMSQAMRKLA
GNLKQSNTLLIFINQIRMKIGVMFGNPETTTGGNALKFYASVRLDIRRIGAVKEGDNVVG
SETRVKVVKNKIAAPFKQAEFQILYGEGINFYGELVDLGVKEKLIEKAGAWYSYNGEKIG
QGKANATTWLKENPATAKEIEKRVRELLLSNQNATPDFAVDDS--EGVAETNEDF--
>Salmonella_enterica_subsp._enterica_serovar_Agona_strain_USDA-ARS-USMARC-76333_chromosome__complete_genome
MAIDENKQKALAAALGQIEKQFGKGSIMRLGEDRSMDVETISTGSLSLDIALGAGGLPMG
RIVEIYGPESSGKTTLTLQVIAAAQREGKTCAFIDAEHALDPVYARKLGVDIDNLLCSQP
DTGEQALEICDALARSGAVDVIVVDSVAALTPKAEIEGEIGDSHMGLAARMMSQAMRKLA
GNLKQSNTLLIFINQIRMKIGVMFGNPETTTGGNALKFYASVRLDIRRIGAVKEGDNVVG
SETRVKVVKNKIAAPFKQAEFQILYGEGINFYGELVDLGVKEKLIEKAGAWYSYNGEKIG
QGKANATTWLKENPATAKEIEKRVRELLLSNQNATPDFAVDDS--EGVAETNEDF--
>Salmonella_enterica_subsp._enterica_serovar_Enteritidis_str._EC20121178__complete_genome
MAIDENKQKALAAALGQIEKQFGKGSIMRLGEDRSMDVETISTGSLSLDIALGAGGLPMG
RIVEIYGPESSGKTTLTLQVIAAAQREGKTCAFIDAEHALDPVYARKLGVDIDNLLCSQP
DTGEQALEICDALARSGAVDVIVVDSVAALTPKAEIEGEIGDSHMGLAARMMSQAMRKLA
GNLKQSNTLLIFINQIRMKIGVMFGNPETTTGGNALKFYASVRLDIRRIGAVKEGDNVVG
SETRVKVVKNKIAAPFKQAEFQILYGEGINFYGELVDLGVKEKLIEKAGAWYSYNGEKIG
QGKANATTWLKENPATAKEIEKRVRELLLSNQNATPDFAVDDS--EGVAETNEDF--
>Salmonella_enterica_subsp._enterica_serovar_Bareilly_str._CFSAN000963_chromosome__complete_genome
MAIDENKQKALAAALGQIEKQFGKGSIMRLGEDRSMDVETISTGSLSLDIALGAGGLPMG
RIVEIYGPESSGKTTLTLQVIAAAQREGKTCAFIDAEHALDPVYARKLGVDIDNLLCSQP
DTGEQALEICDALARSGAVDVIVVDSVAALTPKAEIEGEIGDSHMGLAARMMSQAMRKLA
GNLKQSNTLLIFINQIRMKIGVMFGNPETTTGGNALKFYASVRLDIRRIGAVKEGDNVVG
SETRVKVVKNKIAAPFKQAEFQILYGEGINFYGELVDLGVKEKLIEKAGAWYSYNGEKIG
QGKANATTWLKENPATAKEIEKRVRELLLSNQNATPDFAVDDS--EGVAETNEDF--
>Salmonella_enterica_subsp._enterica_serovar_Enteritidis_strain_OLF-SE5-1104-2__complete_genome
MAIDENKQKALAAALGQIEKQFGKGSIMRLGEDRSMDVETISTGSLSLDIALGAGGLPMG
RIVEIYGPESSGKTTLTLQVIAAAQREGKTCAFIDAEHALDPVYARKLGVDIDNLLCSQP
DTGEQALEICDALARSGAVDVIVVDSVAALTPKAEIEGEIGDSHMGLAARMMSQAMRKLA
GNLKQSNTLLIFINQIRMKIGVMFGNPETTTGGNALKFYASVRLDIRRIGAVKEGDNVVG
SETRVKVVKNKIAAPFKQAEFQILYGEGINFYGELVDLGVKEKLIEKAGAWYSYNGEKIG
QGKANATTWLKENPATAKEIEKRVRELLLSNQNATPDFAVDDS--EGVAETNEDF--
>Salmonella_enterica_subsp._enterica_serovar_1_4_[5]_12_i_-_strain_PNCS007098_chromosome__complete_genome
MAIDENKQKALAAALGQIEKQFGKGSIMRLGEDRSMDVETISTGSLSLDIALGAGGLPMG
RIVEIYGPESSGKTTLTLQVIAAAQREGKTCAFIDAEHALDPVYARKLGVDIDNLLCSQP
DTGEQALEICDALARSGAVDVIVVDSVAALTPKAEIEGEIGDSHMGLAARMMSQAMRKLA
GNLKQSNTLLIFINQIRMKIGVMFGNPETTTGGNALKFYASVRLDIRRIGAVKEGDNVVG
SETRVKVVKNKIAAPFKQAEFQILYGEGINFYGELVDLGVKEKLIEKAGAWYSYNGEKIG
QGKANATTWLKENPATAKEIEKRVRELLLSNQNATPDFAVDDS--EGVAETNEDF--
>Salmonella_enterica_subsp._enterica_serovar_Stanley_strain_sg_wt8_chromosome__complete_genome
MAIDENKQKALAAALGQIEKQFGKGSIMRLGEDRSMDVETISTGSLSLDIALGAGGLPMG
RIVEIYGPESSGKTTLTLQVIAAAQREGKTCAFIDAEHALDPVYARKLGVDIDNLLCSQP
DTGEQALEICDALARSGAVDVIVVDSVAALTPKAEIEGEIGDSHMGLAARMMSQAMRKLA
GNLKQSNTLLIFINQIRMKIGVMFGNPETTTGGNALKFYASVRLDIRRIGAVKEGDNVVG
SETRVKVVKNKIAAPFKQAEFQILYGEGINFYGELVDLGVKEKLIEKAGAWYSYNGEKIG
QGKANATTWLKENPATAKEIEKRVRELLLSNQNATPDFAVDDS--EGVAETNEDF--
>Salmonella_enterica_subsp._enterica_serovar_Krefeld_str._SA20030536_chromosome__complete_genome
MAIDENKQKALAAALGQIEKQFGKGSIMRLGEDRSMDVETISTGSLSLDIALGAGGLPMG
RIVEIYGPESSGKTTLTLQVIAAAQREGKTCAFIDAEHALDPVYARKLGVDIDNLLCSQP
DTGEQALEICDALARSGAVDVIVVDSVAALTPKAEIEGEIGDSHMGLAARMMSQAMRKLA
GNLKQSNTLLIFINQIRMKIGVMFGNPETTTGGNALKFYASVRLDIRRIGAVKEGDNVVG
SETRVKVVKNKIAAPFKQAEFQILYGEGINFYGELVDLGVKEKLIEKAGAWYSYNGEKIG
QGKANATTWLKENPATAKEIEKRVRELLLSNQNATPDFAVDDS--EGVAETNEDF--
>Salmonella_enterica_subsp._enterica_serovar_Typhimurium_str._14028S_substr._JY996_chromosome__complete_genome
MAIDENKQKALAAALGQIEKQFGKGSIMRLGEDRSMDVETISTGSLSLDIALGAGGLPMG
RIVEIYGPESSGKTTLTLQVIAAAQREGKTCAFIDAEHALDPVYARKLGVDIDNLLCSQP
DTGEQALEICDALARSGAVDVIVVDSVAALTPKAEIEGEIGDSHMGLAARMMSQAMRKLA
GNLKQSNTLLIFINQIRMKIGVMFGNPETTTGGNALKFYASVRLDIRRIGAVKEGDNVVG
SETRVKVVKNKIAAPFKQAEFQILYGEGINFYGELVDLGVKEKLIEKAGAWYSYNGEKIG
QGKANATTWLKENPATAKEIEKRVRELLLSNQNATPDFAVDDS--EGVAETNEDF--
>Salmonella_enterica_subsp._enterica_serovar_Typhi_strain_WGS1146_chromosome__complete_genome
MAIDENKQKALAAALGQIEKQFGKGSIMRLGEDRSMDVETISTGSLSLDIALGAGGLPMG
RIVEIYGPESSGKTTLTLQVIAAAQREGKTCAFIDAEHALDPVYARKLGVDIDNLLCSQP
DTGEQALEICDALARSGAVDVIVVDSVAALTPKAEIEGEIGDSHMGLAARMMSQAMRKLA
GNLKQSNTLLIFINQIRMKIGVMFGNPETTTGGNALKFYASVRLDIRRIGAVKEGDNVVG
SETRVKVVKNKIAAPFKQAEFQILYGEGINFYGELVDLGVKEKLIEKAGAWYSYNGEKIG
QGKANATTWLKENPATAKEIEKRVRELLLSNQNATPDFAVDDS--EGVAETNEDF--
>Salmonella_enterica_subsp._enterica_serovar_Enteritidis_strain_OLF-SE11-10058__complete_genome
MAIDENKQKALAAALGQIEKQFGKGSIMRLGEDRSMDVETISTGSLSLDIALGAGGLPMG
RIVEIYGPESSGKTTLTLQVIAAAQREGKTCAFIDAEHALDPVYARKLGVDIDNLLCSQP
DTGEQALEICDALARSGAVDVIVVDSVAALTPKAEIEGEIGDSHMGLAARMMSQAMRKLA
GNLKQSNTLLIFINQIRMKIGVMFGNPETTTGGNALKFYASVRLDIRRIGAVKEGDNVVG
SETRVKVVKNKIAAPFKQAEFQILYGEGINFYGELVDLGVKEKLIEKAGAWYSYNGEKIG
QGKANATTWLKENPATAKEIEKRVRELLLSNQNATPDFAVDDS--EGVAETNEDF--
>Salmonella_enterica_subsp._enterica_serovar_Anatum_str._USDA-ARS-USMARC-1677__complete_genome
MAIDENKQKALAAALGQIEKQFGKGSIMRLGEDRSMDVETISTGSLSLDIALGAGGLPMG
RIVEIYGPESSGKTTLTLQVIAAAQREGKTCAFIDAEHALDPVYARKLGVDIDNLLCSQP
DTGEQALEICDALARSGAVDVIVVDSVAALTPKAEIEGEIGDSHMGLAARMMSQAMRKLA
GNLKQSNTLLIFINQIRMKIGVMFGNPETTTGGNALKFYASVRLDIRRIGAVKEGDNVVG
SETRVKVVKNKIAAPFKQAEFQILYGEGINFYGELVDLGVKEKLIEKAGAWYSYNGEKIG
QGKANATTWLKENPATAKEIEKRVRELLLSNQNATPDFAVDDS--EGVAETNEDF--
>Salmonella_enterica_subsp._enterica_serovar_Bareilly_str._CFSAN000191_chromosome__complete_genome
MAIDENKQKALAAALGQIEKQFGKGSIMRLGEDRSMDVETISTGSLSLDIALGAGGLPMG
RIVEIYGPESSGKTTLTLQVIAAAQREGKTCAFIDAEHALDPVYARKLGVDIDNLLCSQP
DTGEQALEICDALARSGAVDVIVVDSVAALTPKAEIEGEIGDSHMGLAARMMSQAMRKLA
GNLKQSNTLLIFINQIRMKIGVMFGNPETTTGGNALKFYASVRLDIRRIGAVKEGDNVVG
SETRVKVVKNKIAAPFKQAEFQILYGEGINFYGELVDLGVKEKLIEKAGAWYSYNGEKIG
QGKANATTWLKENPATAKEIEKRVRELLLSNQNATPDFAVDDS--EGVAETNEDF--
>Salmonella_enterica_subsp._enterica_serovar_Apapa_str._SA20060561_chromosome__complete_genome
MAIDENKQKALAAALGQIEKQFGKGSIMRLGEDRSMDVETISTGSLSLDIALGAGGLPMG
RIVEIYGPESSGKTTLTLQVIAAAQREGKTCAFIDAEHALDPVYARKLGVDIDNLLCSQP
DTGEQALEICDALARSGAVDVIVVDSVAALTPKAEIEGEICDSHMSLAARMMSQAMRKLA
GNLKQSNTLLIFINQIRMKIGVMFGNPETTTGGNALKFYASVRLDIRRIGAVKEGDNVVG
SETRVKVVKNKIAAPFKQAEFQILYGEGINFYGELVDLGVKEKLIEKAGAWYSYNGEKIG
QGKANATTWLKENPATAKEIEKRVRELLLSNQNATPDFAVDDS--EGVAETNEDF--
>Salmonella_enterica_subsp._enterica_serovar_Typhi_strain_343076_241106_chromosome__complete_genome
MAIDENKQKALAAALGQIEKQFGKGSIMRLGEDRSMDVETISTGSLSLDIALGAGGLPMG
RIVEIYGPESSGKTTLTLQVIAAAQREGKTCAFIDAEHALDPVYARKLGVDIDNLLCSQP
DTGEQALEICDALARSGAVDVIVVDSVAALTPKAEIEGEIGDSHMGLAARMMSQAMRKLA
GNLKQSNTLLIFINQIRMKIGVMFGNPETTTGGNALKFYASVRLDIRRIGAVKEGDNVVG
SETRVKVVKNKIAAPFKQAEFQILYGEGINFYGELVDLGVKEKLIEKAGAWYSYNGEKIG
QGKANATTWLKENPATAKEIEKRVRELLLSNQNATPDFAVDDS--EGVAETNEDF--
>Salmonella_enterica_subsp._enterica_serovar_Agona_strain_USDA-ARS-USMARC-76334_chromosome__complete_genome
MAIDENKQKALAAALGQIEKQFGKGSIMRLGEDRSMDVETISTGSLSLDIALGAGGLPMG
RIVEIYGPESSGKTTLTLQVIAAAQREGKTCAFIDAEHALDPVYARKLGVDIDNLLCSQP
DTGEQALEICDALARSGAVDVIVVDSVAALTPKAEIEGEIGDSHMGLAARMMSQAMRKLA
GNLKQSNTLLIFINQIRMKIGVMFGNPETTTGGNALKFYASVRLDIRRIGAVKEGDNVVG
SETRVKVVKNKIAAPFKQAEFQILYGEGINFYGELVDLGVKEKLIEKAGAWYSYNGEKIG
QGKANATTWLKENPATAKEIEKRVRELLLSNQNATPDFAVDDS--EGVAETNEDF--
>Salmonella_enterica_subsp._enterica_serovar_Typhimurium_str._CDC_2011K-0870__complete_genome
MAIDENKQKALAAALGQIEKQFGKGSIMRLGEDRSMDVETISTGSLSLDIALGAGGLPMG
RIVEIYGPESSGKTTLTLQVIAAAQREGKTCAFIDAEHALDPVYARKLGVDIDNLLCSQP
DTGEQALEICDALARSGAVDVIVVDSVAALTPKAEIEGEIGDSHMGLAARMMSQAMRKLA
GNLKQSNTLLIFINQIRMKIGVMFGNPETTTGGNALKFYASVRLDIRRIGAVKEGDNVVG
SETRVKVVKNKIAAPFKQAEFQILYGEGINFYGELVDLGVKEKLIEKAGAWYSYNGEKIG
QGKANATTWLKENPATAKEIEKRVRELLLSNQNATPDFAVDDS--EGVAETNEDF--
>Salmonella_enterica_subsp._enterica_serovar_Minnesota_str._ATCC_49284__complete_genome
MAIDENKQKALAAALGQIEKQFGKGSIMRLGEDRSMDVETISTGSLSLDIALGAGGLPMG
RIVEIYGPESSGKTTLTLQVIAAAQREGKTCAFIDAEHALDPVYARKLGVDIDNLLCSQP
DTGEQALEICDALARSGAVDVIVVDSVAALTPKAEIEGEIGDSHMGLAARMMSQAMRKLA
GNLKQSNTLLIFINQIRMKIGVMFGNPETTTGGNALKFYASVRLDIRRIGAVKEGDNVVG
SETRVKVVKNKIAAPFKQAEFQILYGEGINFYGELVDLGVKEKLIEKAGAWYSYNGEKIG
QGKANATTWLKENPATAKEIEKRVRELLLSNQNATPDFAVDDS--EGVAETNEDF--
>Salmonella_enterica_subsp._enterica_serovar_Typhi_str._Ty21a__complete_genome
MAIDENKQKALAAALGQIEKQFGKGSIMRLGEDRSMDVETISTGSLSLDIALGAGGLPMG
RIVEIYGPESSGKTTLTLQVIAAAQREGKTCAFIDAEHALDPVYARKLGVDIDNLLCSQP
DTGEQALEICDALARSGAVDVIVVDSVAALTPKAEIEGEIGDSHMGLAARMMSQAMRKLA
GNLKQSNTLLIFINQIRMKIGVMFGNPETTTGGNALKFYASVRLDIRRIGAVKEGDNVVG
SETRVKVVKNKIAAPFKQAEFQILYGEGINFYGELVDLGVKEKLIEKAGAWYSYNGEKIG
QGKANATTWLKENPATAKEIEKRVRELLLSNQNATPDFAVDDS--EGVAETNEDF--
>Salmonella_enterica_subsp._enterica_serovar_4_[5]_12_i_-_strain_USDA15WA-1_chromosome__complete_genome
MAIDENKQKALAAALGQIEKQFGKGSIMRLGEDRSMDVETISTGSLSLDIALGAGGLPMG
RIVEIYGPESSGKTTLTLQVIAAAQREGKTCAFIDAEHALDPVYARKLGVDIDNLLCSQP
DTGEQALEICDALARSGAVDVIVVDSVAALTPKAEIEGEIGDSHMGLAARMMSQAMRKLA
GNLKQSNTLLIFINQIRMKIGVMFGNPETTTGGNALKFYASVRLDIRRIGAVKEGDNVVG
SETRVKVVKNKIAAPFKQAEFQILYGEGINFYGELVDLGVKEKLIEKAGAWYSYNGEKIG
QGKANATTWLKENPATAKEIEKRVRELLLSNQNATPDFAVDDS--EGVAETNEDF--
>Salmonella_enterica_subsp._enterica_serovar_Typhimurium_str._14028S__complete_genome
MAIDENKQKALAAALGQIEKQFGKGSIMRLGEDRSMDVETISTGSLSLDIALGAGGLPMG
RIVEIYGPESSGKTTLTLQVIAAAQREGKTCAFIDAEHALDPVYARKLGVDIDNLLCSQP
DTGEQALEICDALARSGAVDVIVVDSVAALTPKAEIEGEIGDSHMGLAARMMSQAMRKLA
GNLKQSNTLLIFINQIRMKIGVMFGNPETTTGGNALKFYASVRLDIRRIGAVKEGDNVVG
SETRVKVVKNKIAAPFKQAEFQILYGEGINFYGELVDLGVKEKLIEKAGAWYSYNGEKIG
QGKANATTWLKENPATAKEIEKRVRELLLSNQNATPDFAVDDS--EGVAETNEDF--
>Salmonella_enterica_subsp._enterica_serovar_Enteritidis_str._EC20110359__complete_genome
MAIDENKQKALAAALGQIEKQFGKGSIMRLGEDRSMDVETISTGSLSLDIALGAGGLPMG
RIVEIYGPESSGKTTLTLQVIAAAQREGKTCAFIDAEHALDPVYARKLGVDIDNLLCSQP
DTGEQALEICDALARSGAVDVIVVDSVAALTPKAEIEGEIGDSHMGLAARMMSQAMRKLA
GNLKQSNTLLIFINQIRMKIGVMFGNPETTTGGNALKFYASVRLDIRRIGAVKEGDNVVG
SETRVKVVKNKIAAPFKQAEFQILYGEGINFYGELVDLGVKEKLIEKAGAWYSYNGEKIG
QGKANATTWLKENPATAKEIEKRVRELLLSNQNATPDFAVDDS--EGVAETNEDF--
>Salmonella_enterica_subsp._enterica_strain_G0203B005471_chromosome__complete_genome
MAIDENKQKALAAALGQIEKQFGKGSIMRLGEDRSMDVETISTGSLSLDIALGAGGLPMG
RIVEIYGPESSGKTTLTLQVIAAAQREGKTCAFIDAEHALDPVYARKLGVDIDNLLCSQP
DTGEQALEICDALARSGAVDVIVVDSVAALTPKAEIEGEIGDSHMGLAARMMSQAMRKLA
GNLKQSNTLLIFINQIRMKIGVMFGNPETTTGGNALKFYASVRLDIRRIGAVKEGDNVVG
SETRVKVVKNKIAAPFKQAEFQILYGEGINFYGELVDLGVKEKLIEKAGAWYSYNGEKIG
QGKANATTWLKENPATAKEIEKRVRELLLSNQNATPDFAVDDS--EGVAETNEDF--
>Salmonella_enterica_subsp._enterica_serovar_Senftenberg_strain_SA20130280_chromosome__complete_genome
MAIDENKQKALAAALGQIEKQFGKGSIMRLGEDRSMDVETISTGSLSLDIALGAGGLPMG
RIVEIYGPESSGKTTLTLQVIAAAQREGKTCAFIDAEHALDPVYARKLGVDIDNLLCSQP
DTGEQALEICDALARSGAVDVIVVDSVAALTPKAEIEGEIGDSHMGLAARMMSQAMRKLA
GNLKQSNTLLIFINQIRMKIGVMFGNPETTTGGNALKFYASVRLDIRRIGAVKEGDNVVG
SETRVKVVKNKIAAPFKQAEFQILYGEGINFYGELVDLGVKEKLIEKAGAWYSYNGEKIG
QGKANATTWLKENPATAKEIEKRVRELLLSNQNATPDFAVDDS--EGVAETNEDF--
>Salmonella_enterica_subsp._enterica_serovar_Enteritidis_strain_Durban__complete_genome
MAIDENKQKALAAALGQIEKQFGKGSIMRLGEDRSMDVETISTGSLSLDIALGAGGLPMG
RIVEIYGPESSGKTTLTLQVIAAAQREGKTCAFIDAEHALDPVYARKLGVDIDNLLCSQP
DTGEQALEICDALARSGAVDVIVVDSVAALTPKAEIEGEIGDSHMGLAARMMSQAMRKLA
GNLKQSNTLLIFINQIRMKIGVMFGNPETTTGGNALKFYASVRLDIRRIGAVKEGDNVVG
SETRVKVVKNKIAAPFKQAEFQILYGEGINFYGELVDLGVKEKLIEKAGAWYSYNGEKIG
QGKANATTWLKENPATAKEIEKRVRELLLSNQNATPDFAVDDS--EGVAETNEDF--
>Salmonella_enterica_subsp._enterica_serovar_Senftenberg_strain_775W_chromosome__complete_genome
MAIDENKQKALAAALGQIEKQFGKGSIMRLGEDRSMDVETISTGSLSLDIALGAGGLPMG
RIVEIYGPESSGKTTLTLQVIAAAQREGKTCAFIDAEHALDPVYARKLGVDIDNLLCSQP
DTGEQALEICDALARSGAVDVIVVDSVAALTPKAEIEGEIGDSHMGLAARMMSQAMRKLA
GNLKQSNTLLIFINQIRMKIGVMFGNPETTTGGNALKFYASVRLDIRRIGAVKEGDNVVG
SETRVKVVKNKIAAPFKQAEFQILYGEGINFYGELVDLGVKEKLIEKAGAWYSYNGEKIG
QGKANATTWLKENPATAKEIEKRVRELLLSNQNATPDFAVDDS--EGVAETNEDF--
>Salmonella_enterica_subsp._enterica_strain_10C0786144_chromosome__complete_genome
MAIDENKQKALAAALGQIEKQFGKGSIMRLGEDRSMDVETISTGSLSLDIALGAGGLPMG
RIVEIYGPESSGKTTLTLQVIAAAQREGKTCAFIDAEHALDPVYARKLGVDIDNLLCSQP
DTGEQALEICDALARSGAVDVIVVDSVAALTPKAEIEGEIGDSHMGLAARMMSQAMRKLA
GNLKQSNTLLIFINQIRMKIGVMFGNPETTTGGNALKFYASVRLDIRRIGAVKEGDNVVG
SETRVKVVKNKIAAPFKQAEFQILYGEGINFYGELVDLGVKEKLIEKAGAWYSYNGEKIG
QGKANATTWLKENPATAKEIEKRVRELLLSNQNATPDFAVDDS--EGVAETNEDF--
>Salmonella_enterica_subsp._enterica_serovar_Enteritidis_strain_SEE2__complete_genome
MAIDENKQKALAAALGQIEKQFGKGSIMRLGEDRSMDVETISTGSLSLDIALGAGGLPMG
RIVEIYGPESSGKTTLTLQVIAAAQREGKTCAFIDAEHALDPVYARKLGVDIDNLLCSQP
DTGEQALEICDALARSGAVDVIVVDSVAALTPKAEIEGEIGDSHMGLAARMMSQAMRKLA
GNLKQSNTLLIFINQIRMKIGVMFGNPETTTGGNALKFYASVRLDIRRIGAVKEGDNVVG
SETRVKVVKNKIAAPFKQAEFQILYGEGINFYGELVDLGVKEKLIEKAGAWYSYNGEKIG
QGKANATTWLKENPATAKEIEKRVRELLLSNQNATPDFAVDDS--EGVAETNEDF--
>Salmonella_enterica_subsp._enterica_serovar_Senftenberg_strain_N17-509_chromosome__complete_genome
MAIDENKQKALAAALGQIEKQFGKGSIMRLGEDRSMDVETISTGSLSLDIALGAGGLPMG
RIVEIYGPESSGKTTLTLQVIAAAQREGKTCAFIDAEHALDPVYARKLGVDIDNLLCSQP
DTGEQALEICDALARSGAVDVIVVDSVAALTPKAEIEGEIGDSHMGLAARMMSQAMRKLA
GNLKQSNTLLIFINQIRMKIGVMFGNPETTTGGNALKFYASVRLDIRRIGAVKEGDNVVG
SETRVKVVKNKIAAPFKQAEFQILYGEGINFYGELVDLGVKEKLIEKAGAWYSYNGEKIG
QGKANATTWLKENPATAKEIEKRVRELLLSNQNATPDFAVDDS--EGVAETNEDF--
>Salmonella_enterica_subsp._enterica_serovar_Newport_str._USDA-ARS-USMARC-1923_chromosome__complete_genome
MAIDENKQKALAAALGQIEKQFGKGSIMRLGEDRSMDVETISTGSLSLDIALGAGGLPMG
RIVEIYGPESSGKTTLTLQVIAAAQREGKTCAFIDAEHALDPVYARKLGVDIDNLLCSQP
DTGEQALEICDALARSGAVDVIVVDSVAALTPKAEIEGEIGDSHMGLAARMMSQAMRKLA
GNLKQSNTLLIFINQIRMKIGVMFGNPETTTGGNALKFYASVRLDIRRIGAVKEGDNVVG
SETRVKVVKNKIAAPFKQAEFQILYGEGINFYGELVDLGVKEKLIEKAGAWYSYNGEKIG
QGKANATTWLKENPATAKEIEKRVRELLLSNQNATPDFAVDDS--EGVAETNEDF--
>Salmonella_enterica_subsp._enterica_serovar_Typhimurium_strain_22495_chromosome__complete_genome
MAIDENKQKALAAALGQIEKQFGKGSIMRLGEDRSMDVETISTGSLSLDIALGAGGLPMG
RIVEIYGPESSGKTTLTLQVIAAAQREGKTCAFIDAEHALDPVYARKLGVDIDNLLCSQP
DTGEQALEICDALARSGAVDVIVVDSVAALTPKAEIEGEIGDSHMGLAARMMSQAMRKLA
GNLKQSNTLLIFINQIRMKIGVMFGNPETTTGGNALKFYASVRLDIRRIGAVKEGDNVVG
SETRVKVVKNKIAAPFKQAEFQILYGEGINFYGELVDLGVKEKLIEKAGAWYSYNGEKIG
QGKANATTWLKENPATAKEIEKRVRELLLSNQNATPDFAVDDS--EGVAETNEDF--
>Salmonella_enterica_subsp._enterica_serovar_Wandsworth_str._SA20092095_chromosome__complete_genome
MAIDENKQKALAAALGQIEKQFGKGSIMRLGEDRSMDVETISTGSLSLDIALGAGGLPMG
RIVEIYGPESSGKTTLTLQVIAAAQREGKTCAFIDAEHALDPVYARKLGVDIDNLLCSQP
DTGEQALEICDALARSGAVDVIVVDSVAALTPKAEIEGEIGDSHMGLAARMMSQAMRKLA
GNLKQSNTLLIFINQIRMKIGVMFGNPETTTGGNALKFYASVRLDIRRIGAVKEGDNVVG
SETRVKVVKNKIAAPFKQAEFQILYGEGINFYGELVDLGVKEKLIEKAGAWYSYNGEKIG
QGKANATTWLKENPATAKEIEKRVRELLLSNQNATPDFAVDDS--EGVAETNEDF--
>Salmonella_enterica_subsp._enterica_serovar_Thompson_strain_CFSAN000738__complete_genome
MAIDENKQKALAAALGQIEKQFGKGSIMRLGEDRSMDVETISTGSLSLDIALGAGGLPMG
RIVEIYGPESSGKTTLTLQVIAAAQREGKTCAFIDAEHALDPVYARKLGVDIDNLLCSQP
DTGEQALEICDALARSGAVDVIVVDSVAALTPKAEIEGEIGDSHMGLAARMMSQAMRKLA
GNLKQSNTLLIFINQIRMKIGVMFGNPETTTGGNALKFYASVRLDIRRIGAVKEGDNVVG
SETRVKVVKNKIAAPFKQAEFQILYGEGINFYGELVDLGVKEKLIEKAGAWYSYNGEKIG
QGKANATTWLKENPATAKEIEKRVRELLLSNQNATPDFAVDDS--EGVAETNEDF--
>Salmonella_enterica_subsp._enterica_serovar_Typhimurium_strain_SO2__complete_genome
MAIDENKQKALAAALGQIEKQFGKGSIMRLGEDRSMDVETISTGSLSLDIALGAGGLPMG
RIVEIYGPESSGKTTLTLQVIAAAQREGKTCAFIDAEHALDPVYARKLGVDIDNLLCSQP
DTGEQALEICDALARSGAVDVIVVDSVAALTPKAEIEGEIGDSHMGLAARMMSQAMRKLA
GNLKQSNTLLIFINQIRMKIGVMFGNPETTTGGNALKFYASVRLDIRRIGAVKEGDNVVG
SETRVKVVKNKIAAPFKQAEFQILYGEGINFYGELVDLGVKEKLIEKAGAWYSYNGEKIG
QGKANATTWLKENPATAKEIEKRVRELLLSNQNATPDFAVDDS--EGVAETNEDF--
>Salmonella_enterica_subsp._enterica_serovar_Anatum_str._USDA-ARS-USMARC-1766__complete_genome
MAIDENKQKALAAALGQIEKQFGKGSIMRLGEDRSMDVETISTGSLSLDIALGAGGLPMG
RIVEIYGPESSGKTTLTLQVIAAAQREGKTCAFIDAEHALDPVYARKLGVDIDNLLCSQP
DTGEQALEICDALARSGAVDVIVVDSVAALTPKAEIEGEIGDSHMGLAARMMSQAMRKLA
GNLKQSNTLLIFINQIRMKIGVMFGNPETTTGGNALKFYASVRLDIRRIGAVKEGDNVVG
SETRVKVVKNKIAAPFKQAEFQILYGEGINFYGELVDLGVKEKLIEKAGAWYSYNGEKIG
QGKANATTWLKENPATAKEIEKRVRELLLSNQNATPDFAVDDS--EGVAETNEDF--
>Salmonella_enterica_strain_MAC15_chromosome__complete_genome
MAIDENKQKALAAALGQIEKQFGKGSIMRLGEDRSMDVETISTGSLSLDIALGAGGLPMG
RIVEIYGPESSGKTTLTLQVIAAAQREGKTCAFIDAEHALDPVYARKLGVDIDNLLCSQP
DTGEQALEICDALARSGAVDVIVVDSVAALTPKAEIEGEIGDSHMGLAARMMSQAMRKLA
GNLKQSNTLLIFINQIRMKIGVMFGNPETTTGGNALKFYASVRLDIRRIGAVKEGDNVVG
SETRVKVVKNKIAAPFKQAEFQILYGEGINFYGELVDLGVKEKLIEKAGAWYSYNGEKIG
QGKANATTWLKENPATAKEIEKRVRELLLSNQNATPDFAVDDS--EGVAETNEDF--
>Salmonella_enterica_subsp._enterica_serovar_Thompson_str._ATCC_8391__complete_genome
MAIDENKQKALAAALGQIEKQFGKGSIMRLGEDRSMDVETISTGSLSLDIALGAGGLPMG
RIVEIYGPESSGKTTLTLQVIAAAQREGKTCAFIDAEHALDPVYARKLGVDIDNLLCSQP
DTGEQALEICDALARSGAVDVIVVDSVAALTPKAEIEGEIGDSHMGLAARMMSQAMRKLA
GNLKQSNTLLIFINQIRMKIGVMFGNPETTTGGNALKFYASVRLDIRRIGAVKEGDNVVG
SETRVKVVKNKIAAPFKQAEFQILYGEGINFYGELVDLGVKEKLIEKAGAWYSYNGEKIG
QGKANATTWLKENPATAKEIEKRVRELLLSNQNATPDFAVDDS--EGVAETNEDF--
>Salmonella_enterica_subsp._enterica_serovar_Senftenberg_SL180013_DNA__complete_genome
MAIDENKQKALAAALGQIEKQFGKGSIMRLGEDRSMDVETISTGSLSLDIALGAGGLPMG
RIVEIYGPESSGKTTLTLQVIAAAQREGKTCAFIDAEHALDPVYARKLGVDIDNLLCSQP
DTGEQALEICDALARSGAVDVIVVDSVAALTPKAEIEGEIGDSHMGLAARMMSQAMRKLA
GNLKQSNTLLIFINQIRMKIGVMFGNPETTTGGNALKFYASVRLDIRRIGAVKEGDNVVG
SETRVKVVKNKIAAPFKQAEFQILYGEGINFYGELVDLGVKEKLIEKAGAWYSYNGEKIG
QGKANATTWLKENPATAKEIEKRVRELLLSNQNATPDFAVDDS--EGVAETNEDF--
>Salmonella_enterica_strain_FORC_030__complete_genome
MAIDENKQKALAAALGQIEKQFGKGSIMRLGEDRSMDVETISTGSLSLDIALGAGGLPMG
RIVEIYGPESSGKTTLTLQVIAAAQREGKTCAFIDAEHALDPVYARKLGVDIDNLLCSQP
DTGEQALEICDALARSGAVDVIVVDSVAALTPKAEIEGEIGDSHMGLAARMMSQAMRKLA
GNLKQSNTLLIFINQIRMKIGVMFGNPETTTGGNALKFYASVRLDIRRIGAVKEGDNVVG
SETRVKVVKNKIAAPFKQAEFQILYGEGINFYGELVDLGVKEKLIEKAGAWYSYNGEKIG
QGKANATTWLKENPATAKEIEKRVRELLLSNQNATPDFAVDDS--EGVAETNEDF--
>Salmonella_enterica_subsp._enterica_serovar_Typhimurium_strain_SO21_chromosome__complete_genome
MAIDENKQKALAAALGQIEKQFGKGSIMRLGEDRSMDVETISTGSLSLDIALGAGGLPMG
RIVEIYGPESSGKTTLTLQVIAAAQREGKTCAFIDAEHALDPVYARKLGVDIDNLLCSQP
DTGEQALEICDALARSGAVDVIVVDSVAALTPKAEIEGEIGDSHMGLAARMMSQAMRKLA
GNLKQSNTLLIFINQIRMKIGVMFGNPETTTGGNALKFYASVRLDIRRIGAVKEGDNVVG
SETRVKVVKNKIAAPFKQAEFQILYGEGINFYGELVDLGVKEKLIEKAGAWYSYNGEKIG
QGKANATTWLKENPATAKEIEKRVRELLLSNQNATPDFAVDDS--EGVAETNEDF--
>Salmonella_enterica_subsp._enterica_serovar_Newport_str._USDA-ARS-USMARC-1925_chromosome__complete_genome
MAIDENKQKALAAALGQIEKQFGKGSIMRLGEDRSMDVETISTGSLSLDIALGAGGLPMG
RIVEIYGPESSGKTTLTLQVIAAAQREGKTCAFIDAEHALDPVYARKLGVDIDNLLCSQP
DTGEQALEICDALARSGAVDVIVVDSVAALTPKAEIEGEIGDSHMGLAARMMSQAMRKLA
GNLKQSNTLLIFINQIRMKIGVMFGNPETTTGGNALKFYASVRLDIRRIGAVKEGDNVVG
SETRVKVVKNKIAAPFKQAEFQILYGEGINFYGELVDLGVKEKLIEKAGAWYSYNGEKIG
QGKANATTWLKENPATAKEIEKRVRELLLSNQNATPDFAVDDS--EGVAETNEDF--
>Salmonella_enterica_strain_CFSAN005645_chromosome__complete_genome
MAIDENKQKALAAALGQIEKQFGKGSIMRLGEDRSMDVETISTGSLSLDIALGAGGLPMG
RIVEIYGPESSGKTTLTLQVIAAAQREGKTCAFIDAEHALDPVYARKLGVDIDNLLCSQP
DTGEQALEICDALARSGAVDVIVVDSVAALTPKAEIEGEIGDSHMGLAARMMSQAMRKLA
GNLKQSNTLLIFINQIRMKIGVMFGNPETTTGGNALKFYASVRLDIRRIGAVKEGDNVVG
SETRVKVVKNKIAAPFKQAEFQILYGEGINFYGELVDLGVKEKLIEKAGAWYSYNGEKIG
QGKANATTWLKENPATAKEIEKRVRELLLSNQNATPDFAVDDS--EGVAETNEDF--
>Salmonella_enterica_subsp._enterica_serovar_Moscow_str._S-1843_chromosome__complete_genome
MAIDENKQKALAAALGQIEKQFGKGSIMRLGEDRSMDVETISTGSLSLDIALGAGGLPMG
RIVEIYGPESSGKTTLTLQVIAAAQREGKTCAFIDAEHALDPVYARKLGVDIDNLLCSQP
DTGEQALEICDALARSGAVDVIVVDSVAALTPKAEIEGEIGDSHMGLAARMMSQAMRKLA
GNLKQSNTLLIFINQIRMKIGVMFGNPETTTGGNALKFYASVRLDIRRIGAVKEGDNVVG
SETRVKVVKNKIAAPFKQAEFQILYGEGINFYGELVDLGVKEKLIEKAGAWYSYNGEKIG
QGKANATTWLKENPATAKEIEKRVRELLLSNQNATPDFAVDDS--EGVAETNEDF--
>Salmonella_enterica_subsp._enterica_serovar_Enteritidis_str._18569__complete_genome
MAIDENKQKALAAALGQIEKQFGKGSIMRLGEDRSMDVETISTGSLSLDIALGAGGLPMG
RIVEIYGPESSGKTTLTLQVIAAAQREGKTCAFIDAEHALDPVYARKLGVDIDNLLCSQP
DTGEQALEICDALARSGAVDVIVVDSVAALTPKAEIEGEIGDSHMGLAARMMSQAMRKLA
GNLKQSNTLLIFINQIRMKIGVMFGNPETTTGGNALKFYASVRLDIRRIGAVKEGDNVVG
SETRVKVVKNKIAAPFKQAEFQILYGEGINFYGELVDLGVKEKLIEKAGAWYSYNGEKIG
QGKANATTWLKENPATAKEIEKRVRELLLSNQNATPDFAVDDS--EGVAETNEDF--
>Salmonella_enterica_subsp._enterica_strain_12C0807861_chromosome__complete_genome
MAIDENKQKALAAALGQIEKQFGKGSIMRLGEDRSMDVETISTGSLSLDIALGAGGLPMG
RIVEIYGPESSGKTTLTLQVIAAAQREGKTCAFIDAEHALDPVYARKLGVDIDNLLCSQP
DTGEQALEICDALARSGAVDVIVVDSVAALTPKAEIEGEIGDSHMGLAARMMSQAMRKLA
GNLKQSNTLLIFINQIRMKIGVMFGNPETTTGGNALKFYASVRLDIRRIGAVKEGDNVVG
SETRVKVVKNKIAAPFKQAEFQILYGEGINFYGELVDLGVKEKLIEKAGAWYSYNGEKIG
QGKANATTWLKENPATAKEIEKRVRELLLSNQNATPDFAVDDS--EGVAETNEDF--
>Salmonella_enterica_subsp._enterica_serovar_1_4_[5]_12_i_-_strain_PNCS007087_chromosome__complete_genome
MAIDENKQKALAAALGQIEKQFGKGSIMRLGEDRSMDVETISTGSLSLDIALGAGGLPMG
RIVEIYGPESSGKTTLTLQVIAAAQREGKTCAFIDAEHALDPVYARKLGVDIDNLLCSQP
DTGEQALEICDALARSGAVDVIVVDSVAALTPKAEIEGEIGDSHMGLAARMMSQAMRKLA
GNLKQSNTLLIFINQIRMKIGVMFGNPETTTGGNALKFYASVRLDIRRIGAVKEGDNVVG
SETRVKVVKNKIAAPFKQAEFQILYGEGINFYGELVDLGVKEKLIEKAGAWYSYNGEKIG
QGKANATTWLKENPATAKEIEKRVRELLLSNQNATPDFAVDDS--EGVAETNEDF--
>Salmonella_enterica_subsp._enterica_serovar_Panama_str._ATCC_7378__complete_genome
MAIDENKQKALAAALGQIEKQFGKGSIMRLGEDRSMDVETISTGSLSLDIALGAGGLPMG
RIVEIYGPESSGKTTLTLQVIAAAQREGKTCAFIDAEHALDPVYARKLGVDIDNLLCSQP
DTGEQALEICDALARSGAVDVIVVDSVAALTPKAEIEGEIGDSHMGLAARMMSQAMRKLA
GNLKQSNTLLIFINQIRMKIGVMFGNPETTTGGNALKFYASVRLDIRRIGAVKEGDNVVG
SETRVKVVKNKIAAPFKQAEFQILYGEGINFYGELVDLGVKEKLIEKAGAWYSYNGEKIG
QGKANATTWLKENPATAKEIEKRVRELLLSNQNATPDFAVDDS--EGVAETNEDF--
>Salmonella_enterica_subsp._enterica_serovar_Agona_str._460004_2-1__complete_genome
MAIDENKQKALAAALGQIEKQFGKGSIMRLGEDRSMDVETISTGSLSLDIALGAGGLPMG
RIVEIYGPESSGKTTLTLQVIAAAQREGKTCAFIDAEHALDPVYARKLGVDIDNLLCSQP
DTGEQALEICDALARSGAVDVIVVDSVAALTPKAEIEGEIGDSHMGLAARMMSQAMRKLA
GNLKQSNTLLIFINQIRMKIGVMFGNPETTTGGNALKFYASVRLDIRRIGAVKEGDNVVG
SETRVKVVKNKIAAPFKQAEFQILYGEGINFYGELVDLGVKEKLIEKAGAWYSYNGEKIG
QGKANATTWLKENPATAKEIEKRVRELLLSNQNATPDFAVDDS--EGVAETNEDF--
>Salmonella_enterica_subsp._enterica_serovar_Johannesburg_str._ST203_chromosome__complete_genome
MAIDENKQKALAAALGQIEKQFGKGSIMRLGEDRSMDVETISTGSLSLDIALGAGGLPMG
RIVEIYGPESSGKTTLTLQVIAAAQREGKTCAFIDAEHALDPVYARKLGVDIDNLLCSQP
DTGEQALEICDALARSGAVDVIVVDSVAALTPKAEIEGEIGDSHMGLAARMMSQAMRKLA
GNLKQSNTLLIFINQIRMKIGVMFGNPETTTGGNALKFYASVRLDIRRIGAVKEGDNVVG
SETRVKVVKNKIAAPFKQAEFQILYGEGINFYGELVDLGVKEKLIEKAGAWYSYNGEKIG
QGKANATTWLKENPATAKEIEKRVRELLLSNQNATPDFAVDDS--EGVAETNEDF--
>Salmonella_enterica_subsp._enterica_serovar_Typhimurium_strain_SL26_chromosome__complete_genome
MAIDENKQKALAAALGQIEKQFGKGSIMRLGEDRSMDVETISTGSLSLDIALGAGGLPMG
RIVEIYGPESSGKTTLTLQVIAAAQREGKTCAFIDAEHALDPVYARKLGVDIDNLLCSQP
DTGEQALEICDALARSGAVDVIVVDSVAALTPKAEIEGEIGDSHMGLAARMMSQAMRKLA
GNLKQSNTLLIFINQIRMKIGVMFGNPETTTGGNALKFYASVRLDIRRIGAVKEGDNVVG
SETRVKVVKNKIAAPFKQAEFQILYGEGINFYGELVDLGVKEKLIEKAGAWYSYNGEKIG
QGKANATTWLKENPATAKEIEKRVRELLLSNQNATPDFAVDDS--EGVAETNEDF--
>Salmonella_enterica_subsp._enterica_strain_CFSA1096_chromosome__complete_genome
MAIDENKQKALAAALGQIEKQFGKGSIMRLGEDRSMDVETISTGSLSLDIALGAGGLPMG
RIVEIYGPESSGKTTLTLQVIAAAQREGKTCAFIDAEHALDPVYARKLGVDIDNLLCSQP
DTGEQALEICDALARSGAVDVIVVDSVAALTPKAEIEGEIGDSHMGLAARMMSQAMRKLA
GNLKQSNTLLIFINQIRMKIGVMFGNPETTTGGNALKFYASVRLDIRRIGAVKEGDNVVG
SETRVKVVKNKIAAPFKQAEFQILYGEGINFYGELVDLGVKEKLIEKAGAWYSYNGEKIG
QGKANATTWLKENPATAKEIEKRVRELLLSNQNATPDFAVDDS--EGVAETNEDF--
>Salmonella_enterica_subsp._enterica_serovar_Quebec_str._S-1267_chromosome__complete_genome
MAIDENKQKALAAALGQIEKQFGKGSIMRLGEDRSMDVETISTGSLSLDIALGAGGLPMG
RIVEIYGPESSGKTTLTLQVIAAAQREGKTCAFIDAEHALDPVYARKLGVDIDNLLCSQP
DTGEQALEICDALARSGAVDVIVVDSVAALTPKAEIEGEIGDSHMGLAARMMSQAMRKLA
GNLKQSNTLLIFINQIRMKIGVMFGNPETTTGGNALKFYASVRLDIRRIGAVKEGDNVVG
SETRVKVVKNKIAAPFKQAEFQILYGEGINFYGELVDLGVKEKLIEKAGAWYSYNGEKIG
QGKANATTWLKENPATAKEIEKRVRELLLSNQNATPDFAVDDS--EGVAETNEDF--
>Salmonella_enterica_subsp._enterica_serovar_Muenster_str._0315_strain_315_chromosome__complete_genome
MAIDENKQKALAAALGQIEKQFGKGSIMRLGEDRSMDVETISTGSLSLDIALGAGGLPMG
RIVEIYGPESSGKTTLTLQVIAAAQREGKTCAFIDAEHALDPVYARKLGVDIDNLLCSQP
DTGEQALEICDALARSGAVDVIVVDSVAALTPKAEIEGEIGDSHMGLAARMMSQAMRKLA
GNLKQSNTLLIFINQIRMKIGVMFGNPETTTGGNALKFYASVRLDIRRIGAVKEGDNVVG
SETRVKVVKNKIAAPFKQAEFQILYGEGINFYGELVDLGVKEKLIEKAGAWYSYNGEKIG
QGKANATTWLKENPATAKEIEKRVRELLLSNQNATPDFAVDDS--EGVAETNEDF--
>Salmonella_enterica_strain_FDAARGOS_70_chromosome__complete_genome
MAIDENKQKALAAALGQIEKQFGKGSIMRLGEDRSMDVETISTGSLSLDIALGAGGLPMG
RIVEIYGPESSGKTTLTLQVIAAAQREGKTCAFIDAEHALDPVYARKLGVDIDNLLCSQP
DTGEQALEICDALARSGAVDVIVVDSVAALTPKAEIEGEIGDSHMGLAARMMSQAMRKLA
GNLKQSNTLLIFINQIRMKIGVMFGNPETTTGGNALKFYASVRLDIRRIGAVKEGDNVVG
SETRVKVVKNKIAAPFKQAEFQILYGEGINFYGELVDLGVKEKLIEKAGAWYSYNGEKIG
QGKANATTWLKENPATAKEIEKRVRELLLSNQNATPDFAVDDS--EGVAETNEDF--
>Salmonella_enterica_subsp._enterica_serovar_Newport_str._CVM_N1543__complete_genome
MAIDENKQKALAAALGQIEKQFGKGSIMRLGEDRSMDVETISTGSLSLDIALGAGGLPMG
RIVEIYGPESSGKTTLTLQVIAAAQREGKTCAFIDAEHALDPVYARKLGVDIDNLLCSQP
DTGEQALEICDALARSGAVDVIVVDSVAALTPKAEIEGEIGDSHMGLAARMMSQAMRKLA
GNLKQSNTLLIFINQIRMKIGVMFGNPETTTGGNALKFYASVRLDIRRIGAVKEGDNVVG
SETRVKVVKNKIAAPFKQAEFQILYGEGINFYGELVDLGVKEKLIEKAGAWYSYNGEKIG
QGKANATTWLKENPATAKEIEKRVRELLLSNQNATPDFAVDDS--EGVAETNEDF--
>Salmonella_enterica_subsp._enterica_serovar_Gallinarum_str._287
MAIDENKQKALAAALGQIEKQFGKGSIMRLGEDRSMDVETISTGSLSLDIALGAGGLPMG
RIVEIYGPESSGKTTLTLQVIAAAQREGKTCAFIDAEHALDPVYARKLGVDIDNLLCSQP
DTGEQALEICDALARSGAVDVIVVDSVAALTPKAEIEGEIGDSHMGLAARMMSQAMRKLA
GNLKQSNTLLIFINQIRMKIGVMFGNPETTTGGNALKFYASVRLDIRRIGAVKEGDNVVG
SETRVKVVKNKIAAPFKQAEFQILYGEGINFYGELVDLGVKEKLIEKAGAWYSYNGEKIG
QGKANATTWLKENPATAKEIEKRVRELLLSNQNATPDFAVDDS--EGVAETNEDF--
>Salmonella_enterica_subsp._enterica_serovar_Anatum_str._USDA-ARS-USMARC-1676__complete_genome
MAIDENKQKALAAALGQIEKQFGKGSIMRLGEDRSMDVETISTGSLSLDIALGAGGLPMG
RIVEIYGPESSGKTTLTLQVIAAAQREGKTCAFIDAEHALDPVYARKLGVDIDNLLCSQP
DTGEQALEICDALARSGAVDVIVVDSVAALTPKAEIEGEIGDSHMGLAARMMSQAMRKLA
GNLKQSNTLLIFINQIRMKIGVMFGNPETTTGGNALKFYASVRLDIRRIGAVKEGDNVVG
SETRVKVVKNKIAAPFKQAEFQILYGEGINFYGELVDLGVKEKLIEKAGAWYSYNGEKIG
QGKANATTWLKENPATAKEIEKRVRELLLSNQNATPDFAVDDS--EGVAETNEDF--
>Salmonella_enterica_subsp._enterica_serovar_Agona_strain_USDA-ARS-USMARC-76336_chromosome__complete_genome
MAIDENKQKALAAALGQIEKQFGKGSIMRLGEDRSMDVETISTGSLSLDIALGAGGLPMG
RIVEIYGPESSGKTTLTLQVIAAAQREGKTCAFIDAEHALDPVYARKLGVDIDNLLCSQP
DTGEQALEICDALARSGAVDVIVVDSVAALTPKAEIEGEIGDSHMGLAARMMSQAMRKLA
GNLKQSNTLLIFINQIRMKIGVMFGNPETTTGGNALKFYASVRLDIRRIGAVKEGDNVVG
SETRVKVVKNKIAAPFKQAEFQILYGEGINFYGELVDLGVKEKLIEKAGAWYSYNGEKIG
QGKANATTWLKENPATAKEIEKRVRELLLSNQNATPDFAVDDS--EGVAETNEDF--
>Salmonella_enterica_subsp._enterica_strain_17447945_chromosome__complete_genome
MAIDENKQKALAAALGQIEKQFGKGSIMRLGEDRSMDVETISTGSLSLDIALGAGGLPMG
RIVEIYGPESSGKTTLTLQVIAAAQREGKTCAFIDAEHALDPVYARKLGVDIDNLLCSQP
DTGEQALEICDALARSGAVDVIVVDSVAALTPKAEIEGEIGDSHMGLAARMMSQAMRKLA
GNLKQSNTLLIFINQIRMKIGVMFGNPETTTGGNALKFYASVRLDIRRIGAVKEGDNVVG
SETRVKVVKNKIAAPFKQAEFQILYGEGINFYGELVDLGVKEKLIEKAGAWYSYNGEKIG
QGKANATTWLKENPATAKEIEKRVRELLLSNQNATPDFAVDDS--EGVAETNEDF--
>Salmonella_enterica_subsp._enterica_serovar_Agona_strain_USDA-ARS-USMARC-76338_chromosome__complete_genome
MAIDENKQKALAAALGQIEKQFGKGSIMRLGEDRSMDVETISTGSLSLDIALGAGGLPMG
RIVEIYGPESSGKTTLTLQVIAAAQREGKTCAFIDAEHALDPVYARKLGVDIDNLLCSQP
DTGEQALEICDALARSGAVDVIVVDSVAALTPKAEIEGEIGDSHMGLAARMMSQAMRKLA
GNLKQSNTLLIFINQIRMKIGVMFGNPETTTGGNALKFYASVRLDIRRIGAVKEGDNVVG
SETRVKVVKNKIAAPFKQAEFQILYGEGINFYGELVDLGVKEKLIEKAGAWYSYNGEKIG
QGKANATTWLKENPATAKEIEKRVRELLLSNQNATPDFAVDDS--EGVAETNEDF--
>Salmonella_enterica_subsp._enterica_strain_08-193-2358_chromosome__complete_genome
MAIDENKQKALAAALGQIEKQFGKGSIMRLGEDRSMDVETISTGSLSLDIALGAGGLPMG
RIVEIYGPESSGKTTLTLQVIAAAQREGKTCAFIDAEHALDPVYARKLGVDIDNLLCSQP
DTGEQALEICDALARSGAVDVIVVDSVAALTPKAEIEGEIGDSHMGLAARMMSQAMRKLA
GNLKQSNTLLIFINQIRMKIGVMFGNPETTTGGNALKFYASVRLDIRRIGAVKEGDNVVG
SETRVKVVKNKIAAPFKQAEFQILYGEGINFYGELVDLGVKEKLIEKAGAWYSYNGEKIG
QGKANATTWLKENPATAKEIEKRVRELLLSNQNATPDFAVDDS--EGVAETNEDF--
>Salmonella_enterica_subsp._enterica_serovar_Brandenburg_strain_SA20064858_chromosome__complete_genome
MAIDENKQKALAAALGQIEKQFGKGSIMRLGEDRSMDVETISTGSLSLDIALGAGGLPMG
RIVEIYGPESSGKTTLTLQVIAAAQREGKTCAFIDAEHALDPVYARKLGVDIDNLLCSQP
DTGEQALEICDALARSGAVDVIVVDSVAALTPKAEIEGEIGDSHMGLAARMMSQAMRKLA
GNLKQSNTLLIFINQIRMKIGVMFGNPETTTGGNALKFYASVRLDIRRIGAVKEGDNVVG
SETRVKVVKNKIAAPFKQAEFQILYGEGINFYGELVDLGVKEKLIEKAGAWYSYNGEKIG
QGKANATTWLKENPATAKEIEKRVRELLLSNQNATPDFAVDDS--EGVAETNEDF--
>Salmonella_enterica_subsp._enterica_serovar_Enteritidis_str._EC20111174__complete_genome
MAIDENKQKALAAALGQIEKQFGKGSIMRLGEDRSMDVETISTGSLSLDIALGAGGLPMG
RIVEIYGPESSGKTTLTLQVIAAAQREGKTCAFIDAEHALDPVYARKLGVDIDNLLCSQP
DTGEQALEICDALARSGAVDVIVVDSVAALTPKAEIEGEIGDSHMGLAARMMSQAMRKLA
GNLKQSNTLLIFINQIRMKIGVMFGNPETTTGGNALKFYASVRLDIRRIGAVKEGDNVVG
SETRVKVVKNKIAAPFKQAEFQILYGEGINFYGELVDLGVKEKLIEKAGAWYSYNGEKIG
QGKANATTWLKENPATAKEIEKRVRELLLSNQNATPDFAVDDS--EGVAETNEDF--
>Salmonella_enterica_subsp._enterica_serovar_Anatum_str._CFSAN003961_chromosome__complete_genome
MAIDENKQKALAAALGQIEKQFGKGSIMRLGEDRSMDVETISTGSLSLDIALGAGGLPMG
RIVEIYGPESSGKTTLTLQVIAAAQREGKTCAFIDAEHALDPVYARKLGVDIDNLLCSQP
DTGEQALEICDALARSGAVDVIVVDSVAALTPKAEIEGEIGDSHMGLAARMMSQAMRKLA
GNLKQSNTLLIFINQIRMKIGVMFGNPETTTGGNALKFYASVRLDIRRIGAVKEGDNVVG
SETRVKVVKNKIAAPFKQAEFQILYGEGINFYGELVDLGVKEKLIEKAGAWYSYNGEKIG
QGKANATTWLKENPATAKEIEKRVRELLLSNQNATPDFAVDDS--EGVAETNEDF--
>Salmonella_enterica_subsp._enterica_serovar_Senftenberg_strain_SA20061017_chromosome__complete_genome
MAIDENKQKALAAALGQIEKQFGKGSIMRLGEDRSMDVETISTGSLSLDIALGAGGLPMG
RIVEIYGPESSGKTTLTLQVIAAAQREGKTCAFIDAEHALDPVYARKLGVDIDNLLCSQP
DTGEQALEICDALARSGAVDVIVVDSVAALTPKAEIEGEIGDSHMGLAARMMSQAMRKLA
GNLKQSNTLLIFINQIRMKIGVMFGNPETTTGGNALKFYASVRLDIRRIGAVKEGDNVVG
SETRVKVVKNKIAAPFKQAEFQILYGEGINFYGELVDLGVKEKLIEKAGAWYSYNGEKIG
QGKANATTWLKENPATAKEIEKRVRELLLSNQNATPDFAVDDS--EGVAETNEDF--
>Salmonella_enterica_strain_ATCC_8400_chromosome__complete_genome
MAIDENKQKALAAALGQIEKQFGKGSIMRLGEDRSMDVETISTGSLSLDIALGAGGLPMG
RIVEIYGPESSGKTTLTLQVIAAAQREGKTCAFIDAEHALDPVYARKLGVDIDNLLCSQP
DTGEQALEICDALARSGAVDVIVVDSVAALTPKAEIEGEIGDSHMGLAARMMSQAMRKLA
GNLKQSNTLLIFINQIRMKIGVMFGNPETTTGGNALKFYASVRLDIRRIGAVKEGDNVVG
SETRVKVVKNKIAAPFKQAEFQILYGEGINFYGELVDLGVKEKLIEKAGAWYSYNGEKIG
QGKANATTWLKENPATAKEIEKRVRELLLSNQNATPDFAVDDS--EGVAETNEDF--
>Salmonella_enterica_subsp._enterica_serovar_Typhimurium_strain_B3589_chromosome__complete_genome
MAIDENKQKALAAALGQIEKQFGKGSIMRLGEDRSMDVETISTGSLSLDIALGAGGLPMG
RIVEIYGPESSGKTTLTLQVIAAAQREGKTCAFIDAEHALDPVYARKLGVDIDNLLCSQP
DTGEQALEICDALARSGAVDVIVVDSVAALTPKAEIEGEIGDSHMGLAARMMSQAMRKLA
GNLKQSNTLLIFINQIRMKIGVMFGNPETTTGGNALKFYASVRLDIRRIGAVKEGDNVVG
SETRVKVVKNKIAAPFKQAEFQILYGEGINFYGELVDLGVKEKLIEKAGAWYSYNGEKIG
QGKANATTWLKENPATAKEIEKRVRELLLSNQNATPDFAVDDS--EGVAETNEDF--
>Salmonella_enterica_subsp._enterica_strain_10C0786041_chromosome__complete_genome
MAIDENKQKALAAALGQIEKQFGKGSIMRLGEDRSMDVETISTGSLSLDIALGAGGLPMG
RIVEIYGPESSGKTTLTLQVIAAAQREGKTCAFIDAEHALDPVYARKLGVDIDNLLCSQP
DTGEQALEICDALARSGAVDVIVVDSVAALTPKAEIEGEIGDSHMGLAARMMSQAMRKLA
GNLKQSNTLLIFINQIRMKIGVMFGNPETTTGGNALKFYASVRLDIRRIGAVKEGDNVVG
SETRVKVVKNKIAAPFKQAEFQILYGEGINFYGELVDLGVKEKLIEKAGAWYSYNGEKIG
QGKANATTWLKENPATAKEIEKRVRELLLSNQNATPDFAVDDS--EGVAETNEDF--
>Salmonella_enterica_subsp._enterica_serovar_Typhimurium_strain_FORC88_chromosome__complete_genome
MAIDENKQKALAAALGQIEKQFGKGSIMRLGEDRSMDVETISTGSLSLDIALGAGGLPMG
RIVEIYGPESSGKTTLTLQVIAAAQREGKTCAFIDAEHALDPVYARKLGVDIDNLLCSQP
DTGEQALEICDALARSGAVDVIVVDSVAALTPKAEIEGEIGDSHMGLAARMMSQAMRKLA
GNLKQSNTLLIFINQIRMKIGVMFGNPETTTGGNALKFYASVRLDIRRIGAVKEGDNVVG
SETRVKVVKNKIAAPFKQAEFQILYGEGINFYGELVDLGVKEKLIEKAGAWYSYNGEKIG
QGKANATAWLKENPATAKEIEKRVRELLLSNQNATPDFAVDDS--EGVAETNEDF--
>Salmonella_enterica_subsp._enterica_serovar_Brancaster_strain_sg_ww281_chromosome__complete_genome
MAIDENKQKALAAALGQIEKQFGKGSIMRLGEDRSMDVETISTGSLSLDIALGAGGLPMG
RIVEIYGPESSGKTTLTLQVIAAAQREGKTCAFIDAEHALDPVYARKLGVDIDNLLCSQP
DTGEQALEICDALARSGAVDVIVVDSVAALTPKAEIEGEIGDSHMGLAARMMSQAMRKLA
GNLKQSNTLLIFINQIRMKIGVMFGNPETTTGGNALKFYASVRLDIRRIGAVKEGDNVVG
SETRVKVVKNKIAAPFKQAEFQILYGEGINFYGELVDLGVKEKLIEKAGAWYSYNGEKIG
QGKANATAWLKENPATAKEIEKRVRELLLSNQNATPDFAVDDS--EGVAETNEDF--
>Salmonella_enterica_subsp._enterica_serovar_Mikawasima_strain_RSE13_chromosome__complete_genome
MAIDENKQKALAAALGQIEKQFGKGSIMRLGEDRSMDVETISTGSLSLDIALGAGGLPMG
RIVEIYGPESSGKTTLTLQVIAAAQREGKTCAFIDAEHALDPVYARKLGVDIDNLLCSQP
DTGEQALEICDALARSGAVDVIVVDSVAALTPKAEIEGEIGDSHMGLAARMMSQAMRKLA
GNLKQSNTLLIFINQIRMKIGVMFGNPETTTGGNALKFYASVRLDIRRIGAVKEGDNVVG
SETRVKVVKNKIAAPFKQAEFQILYGEGINFYGELVDLGVKEKLIEKAGAWYSYNGEKIG
QGKANATAWLKENPATAKEIEKRVRELLLSNQNATPDFAVDDS--EGVAETNEDF--
>Salmonella_enterica_subsp._enterica_serovar_Mikawasima_strain_RSE15_chromosome__complete_genome
MAIDENKQKALAAALGQIEKQFGKGSIMRLGEDRSMDVETISTGSLSLDIALGAGGLPMG
RIVEIYGPESSGKTTLTLQVIAAAQREGKTCAFIDAEHALDPVYARKLGVDIDNLLCSQP
DTGEQALEICDALARSGAVDVIVVDSVAALTPKAEIEGEIGDSHMGLAARMMSQAMRKLA
GNLKQSNTLLIFINQIRMKIGVMFGNPETTTGGNALKFYASVRLDIRRIGAVKEGDNVVG
SETRVKVVKNKIAAPFKQAEFQILYGEGINFYGELVDLGVKEKLIEKAGAWYSYNGEKIG
QGKANATAWLKENPATAKEIEKRVRELLLSNQNATPDFAVDDS--EGVAETNEDF--
>Salmonella_enterica_subsp._enterica_strain_12-0523_chromosome__complete_genome
MAIDENKQKALAAALGQIEKQFGKGSIMRLGEDRSMDVETISTGSLSLDIALGAGGLPMG
RIVEIYGPESSGKTTLTLQVIAAAQREGKTCAFIDAEHALDPVYARKLGVDIDNLLCSQP
DTGEQALEICDALARSGAVDVIVVDSVAALTPKAEIEGEIGDSHMGLAARMMSQAMRKLA
GNLKQSNTLLIFINQIRMKIGVMFGNPETTTGGNALKFYASVRLDIRRIGAVKEGDNVVG
SETRVKVVKNKIAAPFKQAEFQILYGEGINFYGELVDLGVKEKLIEKAGAWYSYNGEKIG
QGKANATAWLKENPATAKEIEKRVRELLLSNQNATPDFAVDDS--EGVAETNEDF--
>Salmonella_enterica_subsp._enterica_serovar_Corvallis_strain_12-01738_chromosome__complete_genome
MAIDENKQKALAAALGQIEKQFGKGSIMRLGEDRSMDVETISTGSLSLDIALGAGGLPMG
RIVEIYGPESSGKTTLTLQVIAAAQREGKTCAFIDAEHALDPVYARKLGVDIDNLLCSQP
DTGEQALEICDALARSGAVDVIVVDSVAALTPKAEIEGEIGDSHMGLAARMMSQAMRKLA
GNLKQSNTLLIFINQIRMKIGVMFGNPETTTGGNALKFYASVRLDIRRIGAVKEGDNVVG
SETRVKVVKNKIAAPFKQAEFQILYGEGINFYGELVDLGVKEKLIEKAGAWYSYNGEKIG
QGKANATTWLKENPATAKEIEKRVRELLLSNQNTTPDFAVDDS--EGVAETNEDF--
>Salmonella_enterica_subsp._enterica_serovar_Saintpaul_strain_FDAARGOS_373_chromosome__complete_genome
MAIDENKQKALAAALGQIEKQFGKGSIMRLGEDRSMDVETISTGSLSLDIALGAGGLPMG
RIVEIYGPESSGKTTLTLQVIAAAQREGKTCAFIDAEHALDPVYARKLGVDIDNLLCSQP
DTGEQALEICDALARSGAVDVIVVDSVAALTPKAEIEGEIGDSHMGLAARMMSQAMRKLA
GNLKQSNTLLIFINQIRMKIGVMFGNPETTTGGNALKFYASVRLDIRRIGAVKEGDNVVG
SETRVKVVKNKIAAPFKQAEFQILYGEGINFYGELVDLGVKEKLIEKAGAWYSYNGEKIG
QGKANATTWLKENPATAKEIEKRVRELLLSNQNTTPDFAVDDS--EGVAETNEDF--
>Salmonella_enterica_subsp._enterica_serovar_Kentucky_str._SA20030505_chromosome__complete_genome
MAIDENKQKALAAALGQIEKQFGKGSIMRLGEDRSMDVETISTGSLSLDIALGAGGLPMG
RIVEIYGPESSGKTTLTLQVIAAAQREGKTCAFIDAEHALDPVYARKLGVDIDNLLCSQP
DTGEQALEICDALARSGAVDVIVVDSVAALTPKAEIEGEIGDSHMGLAARMMSQAMRKLA
GNLKQSNTLLIFINQIRMKIGVMFGNPETTTGGNALKFYASVRLDIRRIGAVKEGDNVVG
SETRVKVVKNKIAAPFKQAEFQILYGEGINFYGELVDLGVKEKLIEKAGAWYSYNGEKIG
QGKANATTWLKENPATAKEIEKRVRELLLSNQNTTPDFAVDDS--EGVAETNEDF--
>Salmonella_enterica_subsp._enterica_serovar_Goldcoast_strain_Sal-5364_chromosome__complete_genome
MAIDENKQKALAAALGQIEKQFGKGSIMRLGEDRSMDVETISTGSLSLDIALGAGGLPMG
RIVEIYGPESSGKTTLTLQVIAAAQREGKTCAFIDAEHALDPVYARKLGVDIDNLLCSQP
DTGEQALEICDALARSGAVDVIVVDSVAALTPKAEIEGEIGDSHMGLAARMMSQAMRKLA
GNLKQSNTLLIFINQIRMKIGVMFGNPETTTGGNALKFYASVRLDIRRIGAVKEGDNVVG
SETRVKVVKNKIAAPFKQAEFQILYGEGINFYGELVDLGVKEKLIEKAGAWYSYNGEKIG
QGKANATTWLKENPATAKEIEKRVRELLLSNQNTTPDFAVDDS--EGVAETNEDF--
>Salmonella_enterica_subsp._enterica_serovar_Corvallis_strain_AR-0406_chromosome__complete_genome
MAIDENKQKALAAALGQIEKQFGKGSIMRLGEDRSMDVETISTGSLSLDIALGAGGLPMG
RIVEIYGPESSGKTTLTLQVIAAAQREGKTCAFIDAEHALDPVYARKLGVDIDNLLCSQP
DTGEQALEICDALARSGAVDVIVVDSVAALTPKAEIEGEIGDSHMGLAARMMSQAMRKLA
GNLKQSNTLLIFINQIRMKIGVMFGNPETTTGGNALKFYASVRLDIRRIGAVKEGDNVVG
SETRVKVVKNKIAAPFKQAEFQILYGEGINFYGELVDLGVKEKLIEKAGAWYSYNGEKIG
QGKANATTWLKENPATAKEIEKRVRELLLSNQNTTPDFAVDDS--EGVAETNEDF--
>Salmonella_enterica_subsp._enterica_serovar_Goldcoast_strain_R18.0877_chromosome__complete_genome
MAIDENKQKALAAALGQIEKQFGKGSIMRLGEDRSMDVETISTGSLSLDIALGAGGLPMG
RIVEIYGPESSGKTTLTLQVIAAAQREGKTCAFIDAEHALDPVYARKLGVDIDNLLCSQP
DTGEQALEICDALARSGAVDVIVVDSVAALTPKAEIEGEIGDSHMGLAARMMSQAMRKLA
GNLKQSNTLLIFINQIRMKIGVMFGNPETTTGGNALKFYASVRLDIRRIGAVKEGDNVVG
SETRVKVVKNKIAAPFKQAEFQILYGEGINFYGELVDLGVKEKLIEKAGAWYSYNGEKIG
QGKANATTWLKENPATAKEIEKRVRELLLSNQNTTPDFAVDDS--EGVAETNEDF--
>Salmonella_enterica_subsp._enterica_serovar_Bareilly_strain_RSE03_chromosome__complete_genome
MAIDENKQKALAAALGQIEKQFGKGSIMRLGEDRSMDVETISTGSLSLDIALGAGGLPMG
RIVEIYGPESSGKTTLTLQVIAAAQREGKTCAFIDAEHALDPVYARKLGVDIDNLLCSQP
DTGEQALEICDALARSGAVDVIVVDSVAALTPKAEIEGEIGDSHMGLAARMMSQAMRKLA
GNLKQSNTLLIFINQIRMKIGVMFGNPETTTGGNALKFYASVRLDIRRIGAVKEGDNVVG
SETRVKVVKNKIAAPFKQAEFQILYGEGINFYGELVDLGVKEKLIEKAGAWYSYNGEKIG
QGKANATTWLKENPATAKEIEKRVRELLLSNQNTTPDFAVDDS--EGVAETNEDF--
>Salmonella_enterica_strain_SA20080453_chromosome__complete_genome
MAIDENKQKALAAALGQIEKQFGKGSIMRLGEDRSMDVETISTGSLSLDIALGAGGLPMG
RIVEIYGPESSGKTTLTLQVIAAAQREGKTCAFIDAEHALDPVYARKLGVDIDNLLCSQP
DTGEQALEICDALARSGAVDVIVVDSVAALTPKAEIEGEIGDSHMGLAARMMSQAMRKLA
GNLKQSNTLLIFINQIRMKIGVMFGNPETTTGGNALKFYASVRLDIRRIGAVKEGDNVVG
SETRVKVVKNKIAAPFKQAEFQILYGEGINFYGELVDLGVKEKLIEKAGAWYSYNGEKIG
QGKANATTWLKENPATAKEIEKKVRELLLSNQNATPDFAVDDS--EGVAETNEDF--
>Salmonella_enterica_subsp._salamae_strain_SA20053897_chromosome__complete_genome
MAIDENKQKALAAALGQIEKQFGKGSIMRLGEDRSMDVETISTGSLSLDIALGAGGLPMG
RIVEIYGPESSGKTTLTLQVIAAAQREGKTCAFIDAEHALDPVYARKLGVDIDNLLCSQP
DTGEQALEICDALARSGAVDVIVVDSVAALTPKAEIEGEIGDSHMGLAARMMSQAMRKLA
GNLKQSNTLLIFINQIRMKIGVMFGNPETTTGGNALKFYASVRLDIRRIGAVKEGDNVVG
SETRVKVVKNKIAAPFKQAEFQILYGEGINFYGELVDLGVKEKLIEKAGAWYSYNGEKIG
QGKANATTWLKENPATAKEIEKKVRELLLSNQNATPDFSVDDS--EGVAETNEDF--
>Salmonella_enterica_subsp._salamae_serovar_42_r_-_strain_RSE09_chromosome__complete_genome
MAIDENKQKALAAALGQIEKQFGKGSIMRLGEDRSMDVETISTGSLSLDIALGAGGLPMG
RIVEIYGPESSGKTTLTLQVIAAAQREGKTCAFIDAEHALDPVYARKLGVDIDNLLCSQP
DTGEQALEICDALARSGAVDVIVVDSVAALTPKAEIEGEIGDSHMGLAARMMSQAMRKLA
GNLKQSNTLLIFINQIRMKIGVMFGNPETTTGGNALKFYASVRLDIRRIGAVKEGDNVVG
SETRVKVVKNKIAAPFKQAEFQILYGEGINFYGELVDLGVKEKLIEKAGAWYSYNGEKIG
QGKANATTWLKENPATAKEIEKKVRELLLSNQNATPDFSVDDS--EGVAETNEDF--
>Salmonella_enterica_subsp._salamae_serovar_42_r_-_strain_RSE42_chromosome__complete_genome
MAIDENKQKALAAALGQIEKQFGKGSIMRLGEDRSMDVETISTGSLSLDIALGAGGLPMG
RIVEIYGPESSGKTTLTLQVIAAAQREGKTCAFIDAEHALDPVYARKLGVDIDNLLCSQP
DTGEQALEICDALARSGAVDVIVVDSVAALTPKAEIEGEIGDSHMGLAARMMSQAMRKLA
GNLKQSNTLLIFINQIRMKIGVMFGNPETTTGGNALKFYASVRLDIRRIGAVKEGDNVVG
SETRVKVVKNKIAAPFKQAEFQILYGEGINFYGELVDLGVKEKLIEKAGAWYSYNGEKIG
QGKANATTWLKENPATAKEIEKKVRELLLSNQNATPDFSVDDS--EGVAETNEDF--
>Salmonella_enterica_subsp._diarizonae_strain_16-SA00356_chromosome__complete_genome
MAIDENKQKALAAALGQIEKQFGKGSIMRLGEDRSMDVETISTGSLSLDIALGAGGLPMG
RIVEIYGPESSGKTTLTLQVIAAAQREGKTCAFIDAEHALDPVYARKLGVDIDNLLCSQP
DTGEQALEICDALARSGAVDVIVVDSVAALTPKAEIEGEIGDSHMGLAARMMSQAMRKLA
GNLKQSNTLLIFINQIRMKIGVMFGNPETTTGGNALKFYASVRLDIRRIGAVKEGDNVVG
SETRVKVVKNKIAAPFKQAEFQILYGEGINFYGELVDLGVKEKLIEKAGAWYSYNGEKIG
QGKANATTWLKENPATAKEIEKKVRELLLSNQNATPDFSVDDS--EGVAETNEDF--
>Salmonella_enterica_subsp._salamae_serovar_42_r_-_strain_RSE36_chromosome__complete_genome
MAIDENKQKALAAALGQIEKQFGKGSIMRLGEDRSMDVETISTGSLSLDIALGAGGLPMG
RIVEIYGPESSGKTTLTLQVIAAAQREGKTCAFIDAEHALDPVYARKLGVDIDNLLCSQP
DTGEQALEICDALARSGAVDVIVVDSVAALTPKAEIEGEIGDSHMGLAARMMSQAMRKLA
GNLKQSNTLLIFINQIRMKIGVMFGNPETTTGGNALKFYASVRLDIRRIGAVKEGDNVVG
SETRVKVVKNKIAAPFKQAEFQILYGEGINFYGELVDLGVKEKLIEKAGAWYSYNGEKIG
QGKANATTWLKENPATAKEIEKKVRELLLSNQNATPDFSVDDS--EGVAETNEDF--
>Salmonella_enterica_subsp._salamae_serovar_56_z10_e_n_x_strain_SA20011914_chromosome__complete_genome
MAIDENKQKALAAALGQIEKQFGKGSIMRLGEDRSMDVETISTGSLSLDIALGAGGLPMG
RIVEIYGPESSGKTTLTLQVIAAAQREGKTCAFIDAEHALDPVYARKLGVDIDNLLCSQP
DTGEQALEICDALARSGAVDVIVVDSVAALTPKAEIEGEIGDSHMGLAARMMSQAMRKLA
GNLKQSNTLLIFINQIRMKIGVMFGNPETTTGGNALKFYASVRLDIRRIGAVKEGDNVVG
SETRVKVVKNKIAAPFKQAEFQILYGEGINFYGELVDLGVKEKLIEKAGAWYSYNGEKIG
QGKANATTWLKENPATAKEIEKKVRELLLSNQNATPDFSVDDS--EGVTETNEDF--
>Salmonella_enterica_subsp._arizonae_serovar_63_g_z51_-_strain_SA19981204_chromosome__complete_genome
MAIDENKQKALAAALGQIEKQFGKGSIMRLGEDRSMDVETISTGSLSLDIALGAGGLPMG
RIVEIYGPESSGKTTLTLQVIAAAQREGKTCAFIDAEHALDPVYARKLGVDIDNLLCSQP
DTGEQALEICDALARSGAVDVIVVDSVAALTPKAEIEGEIGDSHMGLAARMMSQAMRKLA
GNLKQSNTLLIFINQIRMKIGVMFGNPETTTGGNALKFYASVRLDIRRIGAVKEGDNVVG
SETRVKVVKNKIAAPFKQAEFQILYGEGINFYGELVDLGVKEKLIEKAGAWYSYNGEKIG
QGKANATTWLKENPATAKEIEKKVRELLLSNQNSSPDFAVDDS--EGVAETNEDF--
>Salmonella_enterica_subsp._arizonae_strain_SA20100345_chromosome__complete_genome
MAIDENKQKALAAALGQIEKQFGKGSIMRLGEDRSMDVETISTGSLSLDIALGAGGLPMG
RIVEIYGPESSGKTTLTLQVIAAAQREGKTCAFIDAEHALDPVYARKLGVDIDNLLCSQP
DTGEQALEICDALARSGAVDVIVVDSVAALTPKAEIEGEIGDSHMGLAARMMSQAMRKLA
GNLKQSNTLLIFINQIRMKIGVMFGNPETTTGGNALKFYASVRLDIRRIGAVKEGDNVVG
SETRVKVVKNKIAAPFKQAEFQILYGEGINFYGELVDLGVKEKLIEKAGAWYSYNGEKIG
QGKANATTWLKENPATAKEIEKKVRELLLSNQNSSPDFAVDDS--EGVAETNEDF--
>Salmonella_enterica_subsp._arizonae_serovar_62_z36_-_str._RKS2983__complete_genome
MAIDENKQKALAAALGQIEKQFGKGSIMRLGEDRSMDVETISTGSLSLDIALGAGGLPMG
RIVEIYGPESSGKTTLTLQVIAAAQREGKTCAFIDAEHALDPVYARKLGVDIDNLLCSQP
DTGEQALEICDALARSGAVDVIVVDSVAALTPKAEIEGEIGDSHMGLAARMMSQAMRKLA
GNLKQSNTLLIFINQIRMKIGVMFGNPETTTGGNALKFYASVRLDIRRIGAVKEGDNVVG
SETRVKVVKNKIAAPFKQAEFQILYGEGINFYGELVDLGVKEKLIEKAGAWYSYNGEKIG
QGKANATTWLKENPATAKEIEKKVRELLLSNQNSSPDFAVDDS--EGVAETNEDF--
>Salmonella_enterica_subsp._arizonae_serovar_62_z4_z23_--__complete_genome
MAIDENKQKALAAALGQIEKQFGKGSIMRLGEDRSMDVETISTGSLSLDIALGAGGLPMG
RIVEIYGPESSGKTTLTLQVIAAAQREGKTCAFIDAEHALDPVYARKLGVDIDNLLCSQP
DTGEQALEICDALARSGAVDVIVVDSVAALTPKAEIEGEIGDSHMGLAARMMSQAMRKLA
GNLKQSNTLLIFINQIRMKIGVMFGNPETTTGGNALKFYASVRLDIRRIGAVKEGDNVVG
SETRVKVVKNKIAAPFKQAEFQILYGEGINFYGELVDLGVKEKLIEKAGAWYSYNGEKIG
QGKANATTWLKENPATAKEIEKKVRELLLSNQNSSPDFAVDDS--EGVAETNEDF--
>Salmonella_enterica_strain_FDAARGOS_765_chromosome__complete_genome
MAIDENKQKALAAALGQIEKQFGKGSIMRLGEDRSMDVETISTGSLSLDIALGAGGLPMG
RIVEIYGPESSGKTTLTLQVIAAAQREGKTCAFIDAEHALDPVYARKLGVDIDNLLCSQP
DTGEQALEICDALARSGAVDVIVVDSVAALTPKAEIEGEIGDSHMGLAARMMSQAMRKLA
GNLKQSNTLLIFINQIRMKIGVMFGNPETTTGGNALKFYASVRLDIRRIGAVKEGDNVVG
SETRVKVVKNKIAAPFKQAEFQILYGEGINFYGELVDLGVKEKLIEKAGAWYSYNGEKIG
QGKANATTWLKENPATAKEIEKKVRELLLSNQNSSPDFAVDDS--EGVAETNEDF--
>Salmonella_enterica_subsp._diarizonae_strain_11-01853_chromosome__complete_genome
MAIDENKQKALAAALGQIEKQFGKGSIMRLGEDRSMDVETISTGSLSLDIALGAGGLPMG
RIVEIYGPESSGKTTLTLQVIAAAQREGKTCAFIDAEHALDPVYARKLGVDIDNLLCSQP
DTGEQALEICDALARSGAVDVIVVDSVAALTPKAEIEGEIGDSHMGLAARMMSQAMRKLA
GNLKQSNTLLIFINQIRMKIGVMFGNPETTTGGNALKFYASVRLDIRRIGAVKEGDNVVG
SETRVKVVKNKIAAPFKQAEFQILYGEGINFYGELVDLGVKEKLIEKAGAWYSYNGEKIG
QGKANATTWLKENPATAKEIEKKVRELLLSNQDSTPDFAVDDS--EGVAETNEDF--
>Salmonella_enterica_subsp._diarizonae_strain_11-01855__complete_genome
MAIDENKQKALAAALGQIEKQFGKGSIMRLGEDRSMDVETISTGSLSLDIALGAGGLPMG
RIVEIYGPESSGKTTLTLQVIAAAQREGKTCAFIDAEHALDPVYARKLGVDIDNLLCSQP
DTGEQALEICDALARSGAVDVIVVDSVAALTPKAEIEGEIGDSHMGLAARMMSQAMRKLA
GNLKQSNTLLIFINQIRMKIGVMFGNPETTTGGNALKFYASVRLDIRRIGAVKEGDNVVG
SETRVKVVKNKIAAPFKQAEFQILYGEGINFYGELVDLGVKEKLIEKAGAWYSYNGEKIG
QGKANATTWLKENPATAKEIEKKVRELLLSNQDSTPDFAVDDS--EGVAETNEDF--
>Salmonella_enterica_subsp._diarizonae_strain_11-01854_chromosome__complete_genome
MAIDENKQKALAAALGQIEKQFGKGSIMRLGEDRSMDVETISTGSLSLDIALGAGGLPMG
RIVEIYGPESSGKTTLTLQVIAAAQREGKTCAFIDAEHALDPVYARKLGVDIDNLLCSQP
DTGEQALEICDALARSGAVDVIVVDSVAALTPKAEIEGEIGDSHMGLAARMMSQAMRKLA
GNLKQSNTLLIFINQIRMKIGVMFGNPETTTGGNALKFYASVRLDIRRIGAVKEGDNVVG
SETRVKVVKNKIAAPFKQAEFQILYGEGINFYGELVDLGVKEKLIEKAGAWYSYNGEKIG
QGKANATTWLKENPATAKEIEKKVRELLLSNQDSTPDFAVDDS--EGVAETNEDF--
>Salmonella_bongori_NCTC_12419__culture_collection_SGSC_SARC11__complete_genome
MAIDENKQKALAAALGQIEKQFGKGSIMRLGEDRSMDVETISTGSLSLDIALGAGGLPMG
RIVEIYGPESSGKTTLTLQVIAAAQREGKTCAFIDAEHALDPIYARKLGVDIDNLLCSQP
DTGEQALEICDALARSGAVDVIVVDSVAALTPKAEIEGEIGDSHMGLAARMMSQAMRKLA
GNLKQSNTLLIFINQIRMKIGVMFGNPETTTGGNALKFYASVRLDIRRIGAVKEGDNVVG
SETRVKVVKNKIAAPFKQAEFQILYGEGINFYGELVDLGVKEKLIEKAGAWYSYNGEKIG
QGKANATTWLKENPATAKEIEKKVRELLLSNQDSTPDFSVDDS--EGVAETNEDF--
>Salmonella_bongori_N268-08__complete_genome
MAIDENKQKALAAALGQIEKQFGKGSIMRLGEDRSMDVETISTGSLSLDIALGAGGLPMG
RIVEIYGPESSGKTTLTLQVIAAAQREGKTCAFIDAEHALDPIYARKLGVDIDNLLCSQP
DTGEQALEICDALARSGAVDVIVVDSVAALTPKAEIEGEIGDSHMGLAARMMSQAMRKLA
GNLKQSNTLLIFINQIRMKIGVMFGNPETTTGGNALKFYASVRLDIRRIGAVKEGDNVVG
SETRVKVVKNKIAAPFKQAEFQILYGEGINFYGELVDLGVKEKLIEKAGAWYSYNGEKIG
QGKANATTWLKENPATAKEIEKKVRELLLSNQDSTPDFSVDDS--EGVAETNEDF--
>Salmonella_bongori_serovar_48_z41_--_str._RKS3044__complete_genome
MAIDENKQKALAAALGQIEKQFGKGSIMRLGEDRSMDVETISTGSLSLDIALGAGGLPMG
RIVEIYGPESSGKTTLTLQVIAAAQREGKTCAFIDAEHALDPIYARKLGVDIDNLLCSQP
DTGEQALEICDALARSGAVDVIVVDSVAALTPKAEIEGEIGDSHMGLAARMMSQAMRKLA
GNLKQSNTLLIFINQIRMKIGVMFGNPETTTGGNALKFYASVRLDIRRIGAVKEGDNVVG
SETRVKVVKNKIAAPFKQAEFQILYGEGINFYGELVDLGVKEKLIEKAGAWYSYNGEKIG
QGKANATTWLKENPTTAKEIEKKVRELLLSNQDSTPDFSVDDS--EGVAETNEDF--
>Escherichia_coli_strain_CCUG_73778_chromosome__complete_genome
MAIDENKQKALAAALGQIEKQFGKGSIMRLGEDRSMDVETISTGSLSLDIALGAGGLPMG
RIVEIYGPESSGKTTLTLQVIAAAQREGKTCAFIDAEHALDPIYARKLGVDIDNLLCSQP
DTGEQALEICDALARSGAVDVIVVDSVAALTPKAEIEGEIGDSHMGLAARMMSQAMRKLA
GNLKQSNTLLIFINQIRMKIGVMFGNPETTTGGNALKFYASVRLDIRRIGAVKEGENVVG
SETRVKVVKNKIAAPFKQAEFQILYGEGINFYGELVDLGVKEKLIEKAGAWYSYKGEKIG
QGKANATAWLKDNPETAKEIEKKVRELLLSNPNSTPDFSVDDS--EGVAETNEDF--
>Shigella_sonnei_strain_FDAARGOS_524_chromosome__complete_genome
MAIDENKQKALAAALGQIEKQFGKGSIMRLGEDRSMDVETISTGSLSLDIALGAGGLPMG
RIVEIYGPESSGKTTLTLQVIAAAQREGKTCAFIDAEHALDPIYARKLGVDIDNLLCSQP
DTGEQALEICDALARSGAVDVIVVDSVAALTPKAEIEGEIGDSHMGLAARMMSQAMRKLA
GNLKQSNTLLIFINQIRMKIGVMFGNPETTTGGNALKFYASVRLDIRRIGAVKEGENVVG
SETRVKVVKNKIAAPFKQAEFQILYGEGINFYGELVDLGVKEKLIEKAGAWYSYKGEKIG
QGKANATAWLKDNPETAKEIEKKVRELLLSNPNSTPDFSVDDS--EGVAETNEDF--
>Citrobacter_koseri_strain_FDAARGOS_287_chromosome__complete_genome
MAIDENKQKALAAALGQIEKQFGKGSIMRLGEDRSMDVETISTGSLSLDIALGAGGLPMG
RIVEIYGPESSGKTTLTLQVIAAAQREGKTCAFIDAEHALDPIYARKLGVDIDNLLCSQP
DTGEQALEICDALARSGAVDVIVVDSVAALTPKAEIEGEIGDSHMGLAARMMSQAMRKLA
GNLKQSNTLLIFINQIRMKIGVMFGNPETTTGGNALKFYASVRLDIRRIGAVKEGENVVG
SETRVKVVKNKIAAPFKQAEFQILYGEGINFYGELVDLGVKEKLIEKAGAWYSYNGEKIG
QGKANATAWLKENPATAKEIEKKVRELLLSNQDSTPDFSVDDNG-EGVKETNEDF--
>Kosakonia_arachidis_strain_KACC_18508_chromosome__complete_genome
MAIDENKQKALAAALGQIEKQFGKGSIMRLGEDRSMDVETISTGSLSLDIALGAGGLPMG
RIVEIYGPESSGKTTLTLQVIAAAQREGKTCAFIDAEHALDPIYARKLGVDIDNLLCSQP
DTGEQALEICDALARSGAVDVLVVDSVAALTPKAEIEGEIGDSHMGLAARMMSQAMRKLA
GNLKQSNTLLIFINQIRMKIGVMFGNPETTTGGNALKFYASVRLDIRRIGAVKEGDNVIG
SETRVKVVKNKIAAPFKQAEFQILYGEGINFYGELVDLGVKEKLIEKAGAWYSYNGEKIG
QGKANATTWLKENPATAKEIEKKVREILLSNQNSAAQFSVDGNG-EDVEETNEDF--
>Izhakiella_sp._KSNA2_chromosome__complete_genome
MAIDENKQKALAAALGQIEKQFGKGSIMRLGEDRSMDVETISTGSLSLDIALGAGGLPMG
RIVEIYGPESSGKTTLTLQAIAAAQRAGKTCAFIDAEHALDPVYARKLGVDIDNLLCSQP
DTGEQALEICDALARSGAVDVIVVDSVAALTPKAEIEGEIGDSHMGLAARMMSQAMRKLA
GNLKQSNTLLIFINQIRMKIGVMFGNPETTTGGNALKFYASVRLDIRRIGAVKEGENVVG
SETRVKVVKNKVAAPFKQAEFQILYGEGINFHGELVDLGVKHKLIEKAGAWYSYNGDKIG
QGKANASNYLKEHPAVATEIEKKLRELLLSNPDDTPDFTVDDQG-EGVAQTNEDF--
>Buttiauxella_sp._3AFRM03_chromosome__complete_genome
MAIDENKQKALAAALGQIEKQFGKGSIMRLGEDRTMDVETISTGSLSLDIALGAGGLPMG
RIVEIYGPESSGKTTLTLQVIAAAQREGKTCAFIDAEHALDPIYAKKLGVDIDNLLCSQP
DTGEQALEICDALARSGAVDVLVVDSVAALTPKAEIEGEIGDSHMGLAARMMSQAMRKLA
GNLKQSNTLLIFINQIRMKIGVMFGNPETTTGGNALKFYASVRLDIRRIGAVKDGDNVVG
SETRVKVVKNKIAAPFKQAEFQIMYGEGINFYGELVDLGVKHKLIEKAGAWYSYNGEKIG
QGKSNSSNFLKENKPMAVEIEKKLRDMLLNNQDGTPDFVVDDHD-KDVAETKEDF--
>Cronobacter_sakazakii_SP291__complete_genome
MAIDENKQKALAAALGQIEKQFGKGSIMRLGEDRTMDVETISTGSLSLDIALGAGGLPMG
RIVEIYGPESSGKTTLTLQVIAAAQRAGKTCAFIDAEHALDPVYARKLGVDIDNLLCSQP
DTGEQALEICDALARSGAVDVLVVDSVAALTPKAEIEGEIGDSHMGLAARMMSQAMRKLA
GNLKNSNTLLIFINQIRMKIGVMFGNPETTTGGNALKFYASVRLDIRRIGAVKEGEEVVG
SETRVKVVKNKVAAPFKQAEFQILYGEGINFYGELVDLGVKHKLIEKAGAWYSYNGEKIG
QGKANATNFLKENKPMADEIEKKLRDMLLNNQDSTPDFTVDDND-GGVEETNEEF--
>Shimwellia_blattae_DSM_4481_=_NBRC_105725__complete_genome
MAIDENKQKALAAALGQIEKQFGKGSIMRLGEDRTMDVETISTGSLSLDIALGAGGLPMG
RIVEIYGPESSGKTTLTLQVIGAAQREGKTCAFIDAEHALDPVYARKLGVDIDNLLCSQP
DTGEQALEICDALARSGAVDVIVVDSVAALTPKAEIEGEIGDSHMGLAARMMSQAMRKLA
GNLKQSNTLLIFINQIRMKIGVMFGNPETTTGGNALKFYASVRLDIRRIGAVKEGDNVVG
SETRVKVVKNKIAAPFKQAEFQIMYGEGINFYGELVDLGVKHKLIEKAGAWYSYNGEKIG
QGKANASNFLKENKPMATEIEKKLREMLLHNQDSTPDFQVDAYS-ENAPESDENF--
>Cedecea_neteri_strain_SSMD04__complete_genome
MAIDENKQKALAAALGQIEKQFGKGSIMRLGEDRSMDVETISTGSLSLDIALGAGGLPMG
RIVEIYGPESSGKTTLTLQVIAAAQRSGKTCAFIDAEHALDPVYAKKLGVDIDNLLCSQP
DTGEQALEICDALARSGAVDVIIVDSVAALTPKAEIEGEIGDSHMGLAARMMSQAMRKLA
GNLKQSNTLLIFINQIRMKIGVMFGNPETTTGGNALKFYASVRLDIRRIGAVKDGENVVG
SETRVKVVKNKIAAPFKQAEFQILYGEGINFYGELVDLGVKHKLIEKAGAWYSYNGEKIG
QGKANASNFLKENKPMADEIEKKLREMLLNNQDGTPDFTVDDHN-ENAVETNEDF--
>Atlantibacter_hermannii_strain_ATCC_33651_chromosome__complete_genome
MAIDENKQKALAAALGQIEKQFGKGSIMRLGEDRSMDVETISTGSLTLDIALGAGGLPMG
RIVEIYGPESSGKTTLTLQVVAAAQREGKTCAFIDAEHALDPVYARKLGVDIDNLLCSQP
DTGEQALEICDALARSGAVDVIIVDSVAALTPKAEIEGEIGDSHMGLAARMMSQAMRKLA
GNLKQSNTLLIFINQIRMKIGVMFGNPETTTGGNALKFYASVRLDIRRIGAVKEGDEVVG
SETRVKVVKNKIAAPFKQAEFQILYGEGINFYGELVDLGVKHKLIEKAGAWYSYNGEKVG
QGKANATNFLKENTAIAQEIEKKLREQLLHNQDDKPAFSVDEYE-KDESETNEDF--
>Candidatus_Hamiltonella_defensa__Bemisia_tabaci__strain_MEAM1__complete_genome
MIRDENKQKALAAALAQIEKQFGKGSIMRLGEDRSMDVETISTGSLSLDIALGAGGLPMG
RIVEIYGPESSGKTTLTLQVIAAAQREGKVCAFIDAEHALDPVYAKKLGVDIDNLLCSQP
DTGEQALEICDSLTRSGAVDVIIVDSVAALVPKAEIEGEIGDSHMGLAARMMSQAMRKLA
GNLKNANTLLIFINQIRMKIGVMFGNPETTTGGNALKFYASVRLDIRRVGAIKEGEMVIG
NDTRVKVVKNKIAAPFKQADFQILYGEGINTYGELIDLGVKHQLVEKAGSWYSYNGTKIG
QGKSNVTEYLKTNPSIAAELDKILRNKLLNPRFEKDKTALDPLD-KIYHENSTAF--
>Gibbsiella_quercinecans_strain_FRB97__complete_genome
MAIDENKQKALAAALGQIEKQFGKGSIMRLGEDRSMDVETISTGSLSLDIALGAGGLPMG
RIVEIYGPESSGKTTLTLQVIAAAQREGKTCAFIDAEHALDPIYAKKLGVDIDNLLCSQP
DTGEQALEICDALTRSGAVDVIIVDSVAALTPKAEIEGEIGDSHMGLAARMMSQAMRKLA
GNLKNANTLLIFINQIRMKIGVMFGNPETTTGGNALKFYASVRLDIRRIGAIKDGDEVVG
SETRVKVVKNKIAAPFKQAEFQILYGEGINSRGELIDLGVKHKMIEKAGAWYSYNGEKIG
QGKANACNFLKENPAIAAELDKKLRDLLLHNSNEPASATSEGFD-DSEAETSEEF--
>Candidatus_Moranella_endobia_PCVAL__complete_genome
MYIDENKKQALASALVQIEKQFGKGSIMRLGEDRSMDVETISTGSISLDIALGTGGLPMG
RIVEIYGPESSGKTTLALQVIAIAQQENKICAFIDAEHALDPIYAKKLGVDIDNLLCSQP
DNGEQALEICDVLTRSGAVDVIIVDSVAALTPKAEIEGEIGDAHMGLAARMMSQAMRKLT
SNLKNANTLLIFINQIRMKIGVMFGNPETTTGGNALKFYASVRLDIRRIGSVKEGDVVVG
SETRVKVVKNKVAAPFKQAEFQIMYGVGINIIGELVDLGVKHKLIEKAGAWYSYNGENIG
QGKNNAYIFLKEHPALVSELNHRLRNMLMNSVDVTSQIRNLVG--EDVSENNEAL--
>Candidatus_Ishikawaella_capsulata_Mpkobe_DNA__complete_genome
MVIDENKQKALAAALIQIEKQFGKGSIMRLGEDRSMDVETISTGSLSLDIALGVGGLPMG
RIVEIYGPESSGKTTLTLQVIAVAQREGRTCAFIDAEHALDPIYAKTLGVNIDDLLCSQP
DTGEQALEICDALARSGAVDVIIVDSVAALTPKAEIEGEIGDSHMGLAARMMSQAMRKLS
GNLKQSNTLLIFINQIRMKIGVIFGNPETTTGGNALKFYASVRLDIRRIGSIKEGDNIIG
SDTRVKVVKNKVAVPFKQAEFQIMYGKGINIFAELIDVGVKNKLIEKYGSWYSYNGEKIG
QGKINASNFLKENVLIANKIEQQLRNLLFYNKTTCVATEKNQNSKNEISKDNLPFEL
>Candidatus_Tachikawaea_gelatinosa_DNA__complete_genome
MSIEENKEKSLAITLSQIEKQFGKGSIMRLGEDRSMDIETIPTGSLSLDVALGTGGLPMG
RIVEIYGPESSGKTTLTLQVIAEAQKKEKICAFIDAEHALDPIYAKKLGVNINELLCSQP
DTGEQALEICDALTKSGSVDLIVVDSVAALTPKAEIEGEIGDLHIGLTARMMSQAMRKLA
GNLKQFNTLLIFINQIRMKIGVMFGNPETTTGGSALKFYSSVRLDIRRIGAIKDGDSVIG
SETRVKVVKNKVAVPFKQAEFQIMYGKGINKFGEILDLGVKNNLIEKSGVWYSYEEKKIG
QGKNNAIDFLKKNLIITKKIEQILRDKLIN--------IIHDN-----LKT------
>Candidatus_Riesia_pediculicola_USDA__complete_genome
MIINQDKMKSIDLVLDQIEKQFGKGSIMRLGQDRSMKVEAISTGLLSLDVALGVGGLPLG
RIVEIYGPESSGKTTLTLQIISSAQKEKKTCAFIDAEHALDPSYAQKIGVDVDNLLCSQP
DNGEQALEICDALIKSGTVDVIVIDSVAALTPKAEIEGEIGDSHIGLAARMMSQAMRKLA
SNLKNFNVLLIFINQIRMKIGVMFGNSETTTGGNALKFYASIRLDIRKIGSIKNGEEIIG
SSTRVKVVKNKVAVPFKQAEFQILYGEGINIYGEIIDLAVQYKLIEKSGSWYNYQGKQIG
QGKVNVSNYLKSKMDFYRELNEKLRSFLFENR-------------------------
